# Supplementary material for: Skin transcriptome reveals the intrinsic molecular mechanisms underlying hair follicle cycling in Cashmere goats under natural and shortened photoperiod conditions
Source: PubMed Central journal article supplement (PMC5647384; doi:10.1038/s41598-017-13986-w), 2017-10-18
Supplement: 41598_2017_13986_MOESM1_ESM.pdf [file 41598_2017_13986_MOESM1_ESM.pdf]

1 **Skin transcriptome reveals the intrinsic molecular mechanisms underlying hair**  
2 **follicle cycling in Cashmere goats under natural and shortened photoperiod**  
3 **conditions**

4

5 Min Yang<sup>1+</sup>, Shen Song<sup>1,2+</sup>, Kunzhe Dong<sup>1</sup>, XiaoFei Chen<sup>1</sup>, Xuexue Liu<sup>1</sup>, Marhaba  
6 Rouzi<sup>1</sup>, Qianjun Zhao<sup>1</sup>, Xiaohong He<sup>1</sup>, Yabin Pu<sup>1</sup>, Weijun Guan<sup>1</sup>, Yuehui Ma<sup>1\*</sup>, and  
7 Lin Jiang<sup>1\*</sup>

8

9 <sup>1</sup>The Key Laboratory for Farm Animal Genetic Resources and Utilization of Ministry  
10 of Agriculture of China, Institute of Animal Science (IAS), Chinese Academy of  
11 Agricultural Sciences (CAAS), Beijing 100193, China.

12 <sup>2</sup>Department of Animal Genetics and Breeding, China Agricultural University, Beijing  
13 100094, China.

14 <sup>+</sup>These authors contributed equally to this work

15 <sup>\*</sup>Corresponding authors:L.J.(jianglin@caas.cn) and Y.H.M. (yuehui.ma@263.net)

16

17 **Supplementary materials**

18 **Figure S1:** Comparison of the structure of the hair follicle of hair growth cycle

19 **Figure S2:** Comparison of the expression patterns of selected genes detected in

20 RNA-seq (blue lines) and QPCR (red lines) assays showing high correlation between

21 the two methods

22 **Figure S3:** Hierarchical clustering of differentially expressed genes

23 **Figure S4:** The short photoperiod response genes

24 **Figure S5:** The expression localization of *Csdc2* in the Cashmere goat skin

25 **Table S1:** Quantitation of the active secondary follicle of the hair follicle cycle during

26 the different photoperiods of the goat hair follicle cycle.

27 **Table S2:** The number of raw, clean and mapped RNA-seq reads for each sample.

28 **Table S3:** All of DEGs in four transitions and the overlapped genes of transition I and

29 III

30 **Table S4:** The tissue-specific genes expression in goat

31 **Table S5:** The GO terms of each cluster

32 **Table S6:** The short photoperiod response genes of June and the overlapped genes

33 between periodic genes

34 **Table S7:** List of primers used in this study

35

36 **Figure S1:** Comparison of the structure of the hair follicle of hair growth cycle

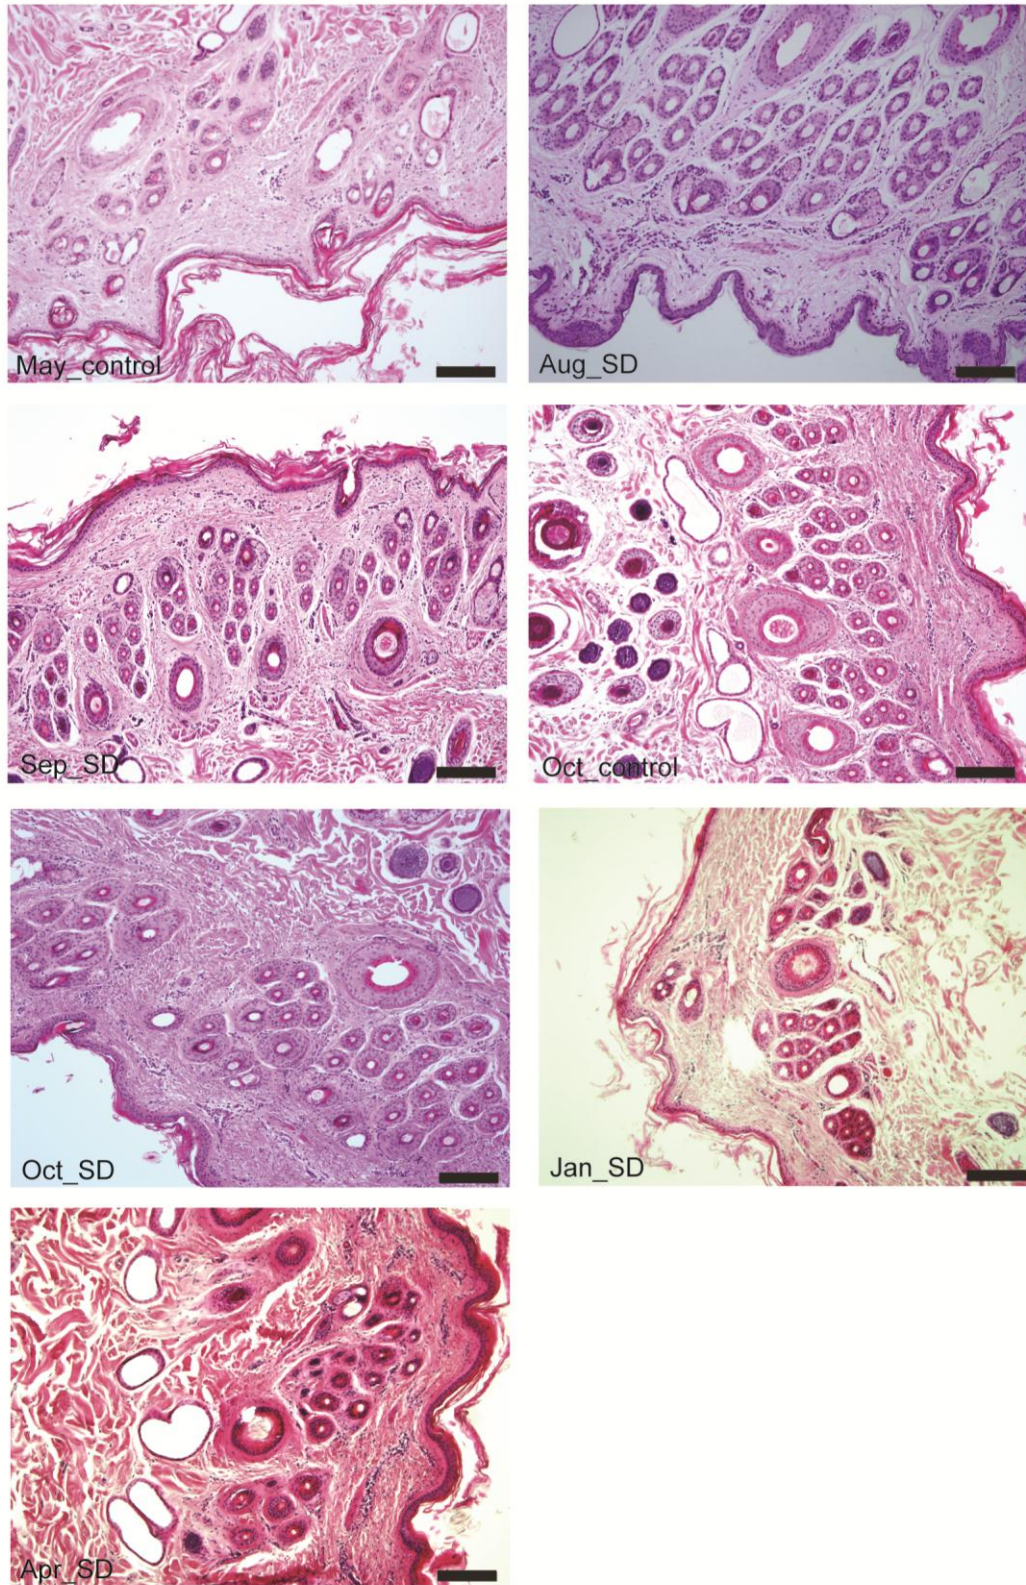

37

38 Scale bars indicate 100 μm.

39 **Figure S2:** Comparison of the expression patterns of selected genes detected in RNA-seq (blue  
 40 lines) and QPCR (red lines) assays showing high correlation between the two methods.

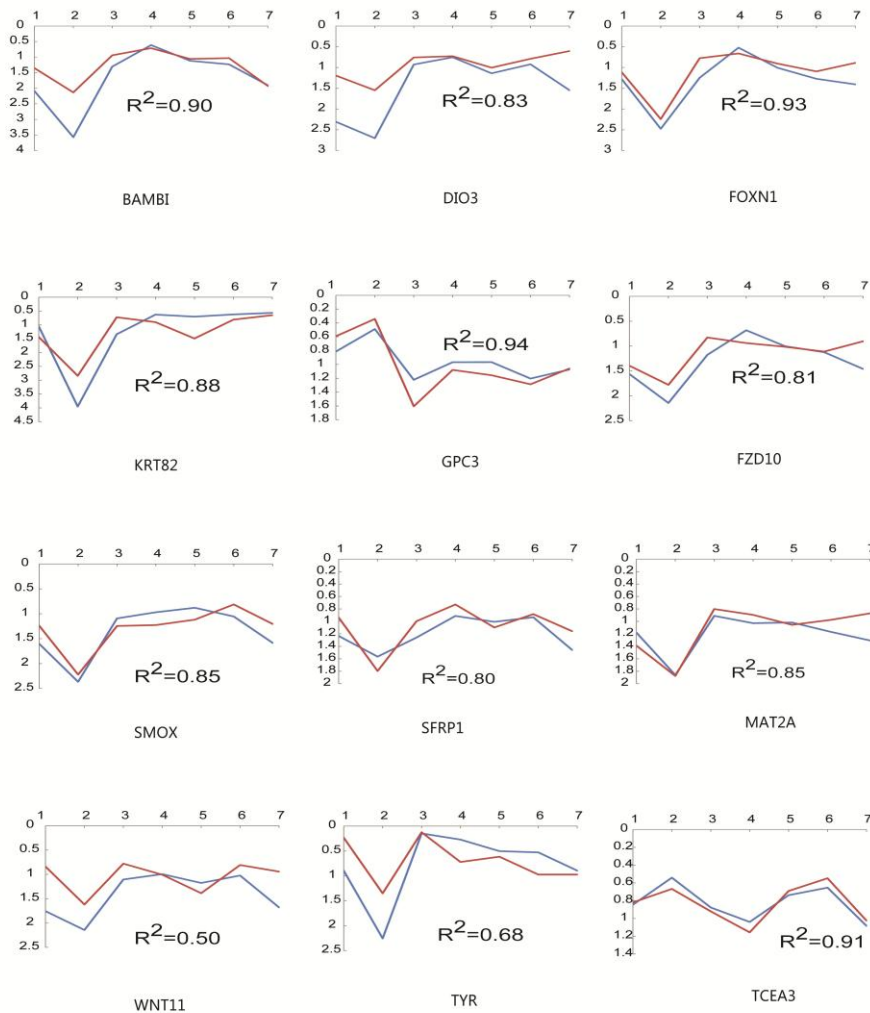

41  
 42 The ratios of the expression changes under natural and short photoperiod groups were calculated  
 43 in different month. The expression levels of the selected genes were normalized against that of  
 44  $\beta$ -actin. The  $R^2$  values (Pearson correlation coefficients) across the different hair follicle  
 45 development time points are shown for each gene. The X-axis 1, 2, 3, 4, 5, 6 and 7 represent May,  
 46 June, August, September, October, January and April, respectively.

47 **Figure S3: Hierarchical clustering of differentially expressed genes**

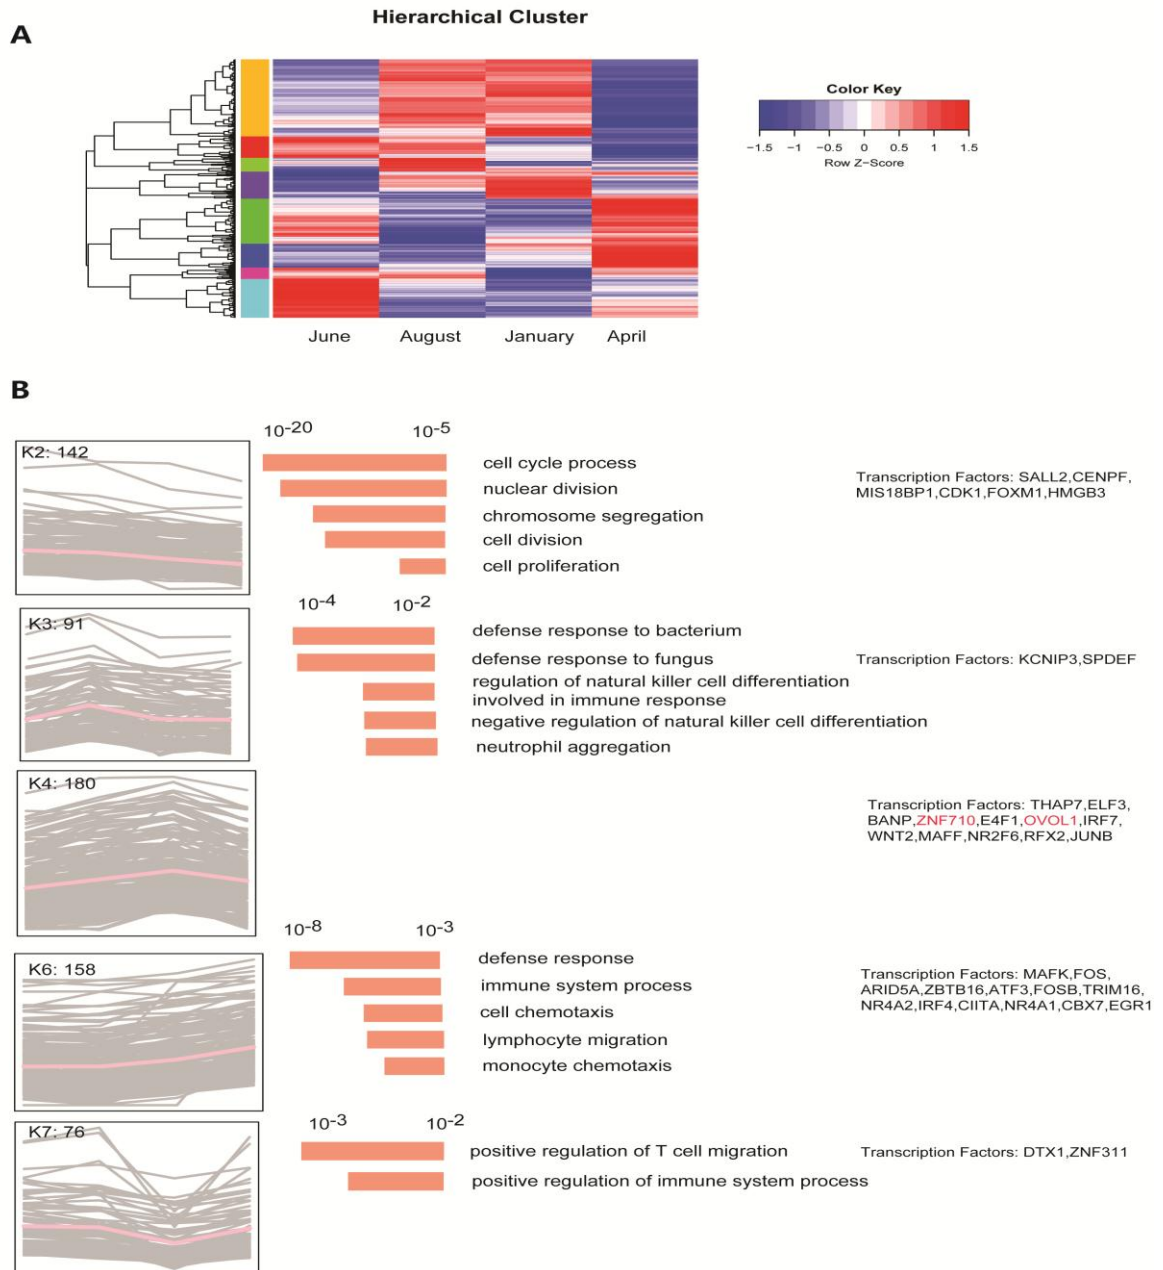

48

49 (A) Eight groups were clustered. (B) Five gene clusters with similar expression trends and  
 50 functional gene annotations. **Left:** The genes were clustered in eight groups based on the relative  
 51 expression with the indicated trends. Each expression trend is shown in the red curves. **Middle:**  
 52 The GO terms associated with the genes in each cluster are listed. Enrichment significance scores  
 53 for each GO term are shown as histograms (orange). **Right:** Previously reported TFs in each

54 cluster are listed; the colorful gene symbols represent the overlapping genes between transitions I

55 and III, with red denoting the up-regulated genes and green denoting the down-regulated genes.

56 Three main clusters (K1, K5, K8) are shown in the **Figure 3**.

57

58 **Figure S4:** The short photoperiod response genes

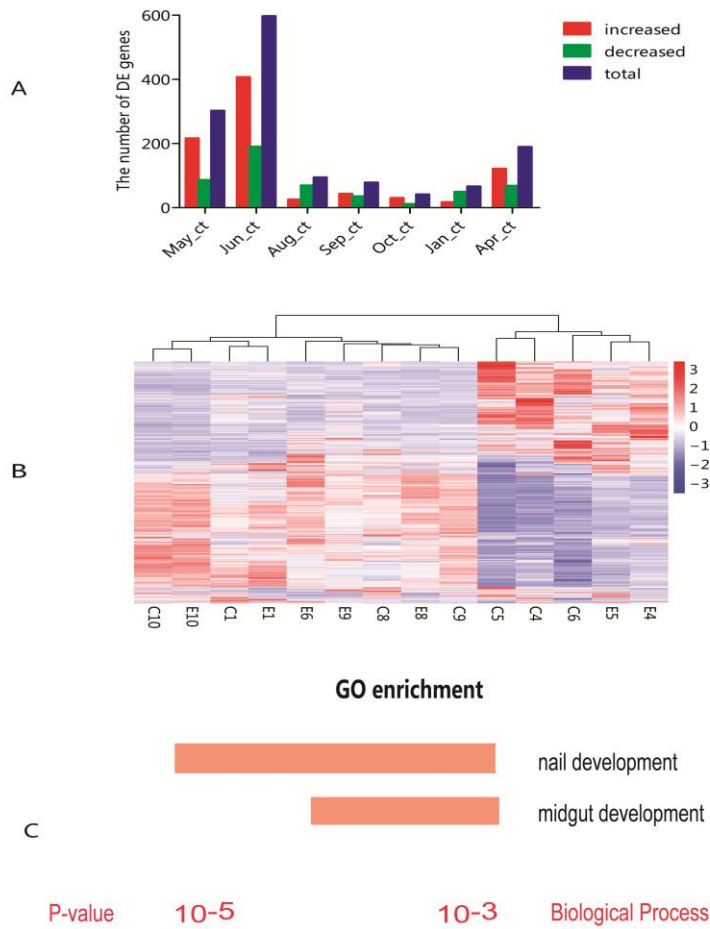

59

60 (A) The numbers of DEGs between test and control groups of different months. (B) The heatmap  
 61 showing the clustering results of the 951 DEGs for test and control groups of different months. (C)  
 62 The GO terms of overlapped genes of periodic and short photoperiod response. Enrichment  
 63 significance scores for each GO term are shown as histograms (orange).

64 **Figure S5:** The expression localization of *Csdc2* in the Cashmere goat skin

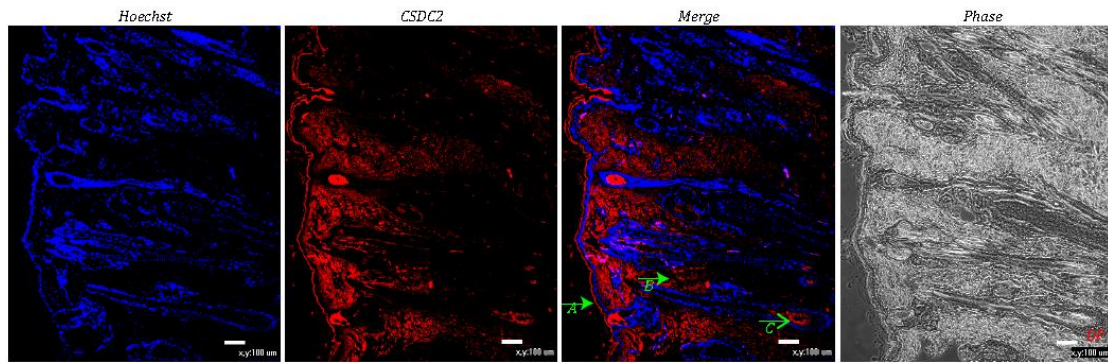

65

66

67 Figure S5. The expression localization of *Csdc2* in the Cashmere goat skin. The skin section was

68 stained with *Csdc2* probe (red), Hoechst (blue). Scale bar = 100 $\mu$ m. The arrows A, B,C

69 represents epidermis, connective tissue and hair shaft. DP, dermal papilla.

70



71 **Table S1:** Quantitation of the active SHFs of the hair follicle cycle during the different  
 72 photoperiods of the goat hair follicle cycle.

| Phases         | Jun        | Jun_SD  | Aug        | Jan        | Apr        |
|----------------|------------|---------|------------|------------|------------|
|                | proanagen  | anagen  | anagen     | catagen    | telogen    |
| ASHF (Mean±SE) | 18.17±1.11 | 62±1.61 | 63.50±1.69 | 45.67±2.32 | 11.33±1.02 |

73 ASHF: the number of active secondary hair follicle

74 SE: Std.Error

75

76 **Table S2:** The number of raw, clean and mapped RNA-seq reads for each sample

| Sample | Raw Reads | Clean Reads | Ratio (clean reads/raw reads) | ratio(mapped left reads/clean reads) | ratio(mapped right reads/clean reads) |
|--------|-----------|-------------|-------------------------------|--------------------------------------|---------------------------------------|
| C10_1  | 22948736  | 21919360    | 95.51                         | 0.847                                | 0.841                                 |
| C10_2  | 36779462  | 35225367    | 95.77                         | 0.855                                | 0.842                                 |
| C10_3  | 22422542  | 21239433    | 94.72                         | 0.858                                | 0.84                                  |
| E10_1  | 21019560  | 20311420    | 96.63                         | 0.855                                | 0.841                                 |
| E10_2  | 38121733  | 36294724    | 95.21                         | 0.85                                 | 0.851                                 |
| E10_3  | 23362580  | 22429846    | 96.01                         | 0.85                                 | 0.843                                 |
| C5_1   | 22275659  | 21373083    | 95.95                         | 0.861                                | 0.861                                 |
| C5_2   | 42047892  | 40059486    | 95.27                         | 0.859                                | 0.856                                 |
| E5_1   | 40997773  | 39478133    | 96.29                         | 0.865                                | 0.857                                 |
| E5_2   | 28868600  | 27810544    | 96.33                         | 0.862                                | 0.851                                 |
| C6_1   | 57689959  | 54518683    | 94.50                         | 0.877                                | 0.868                                 |
| C6_2   | 33140242  | 31981102    | 96.50                         | 0.863                                | 0.85                                  |
| C6_3   | 26367937  | 25455936    | 96.54                         | 0.867                                | 0.858                                 |
| E6_1   | 27248108  | 25793738    | 94.66                         | 0.864                                | 0.852                                 |
| E6_2   | 37000499  | 35446260    | 95.80                         | 0.856                                | 0.852                                 |
| E6_3   | 22744418  | 21946403    | 96.49                         | 0.868                                | 0.855                                 |
| C8_1   | 23001300  | 22222247    | 96.61                         | 0.854                                | 0.845                                 |
| C8_2   | 28109324  | 27082187    | 96.35                         | 0.856                                | 0.845                                 |
| C8_3   | 38610698  | 37371543    | 96.79                         | 0.856                                | 0.846                                 |
| E8_1   | 24053464  | 23205371    | 96.47                         | 0.853                                | 0.841                                 |
| E8_2   | 23098174  | 22316093    | 96.61                         | 0.854                                | 0.844                                 |
| E8_3   | 34058744  | 32831160    | 96.40                         | 0.854                                | 0.843                                 |
| C9_1   | 23444636  | 22586922    | 96.34                         | 0.863                                | 0.852                                 |
| C9_2   | 29966467  | 28727938    | 95.87                         | 0.844                                | 0.834                                 |
| C9_3   | 28471574  | 27109329    | 95.22                         | 0.86                                 | 0.845                                 |
| E9_1   | 25705390  | 24619454    | 95.78                         | 0.838                                | 0.828                                 |
| E9_2   | 25464869  | 24574574    | 96.50                         | 0.858                                | 0.849                                 |
| E9_3   | 26672533  | 25576857    | 95.89                         | 0.864                                | 0.85                                  |
| C1_1   | 25433435  | 23801174    | 93.58                         | 0.837                                | 0.832                                 |
| C1_2   | 24776175  | 23353255    | 94.26                         | 0.845                                | 0.838                                 |
| C1_3   | 22466941  | 21588810    | 96.09                         | 0.849                                | 0.845                                 |
| E1_1   | 20810854  | 19852969    | 95.40                         | 0.849                                | 0.843                                 |
| E1_2   | 23983743  | 23103974    | 96.33                         | 0.834                                | 0.838                                 |
| E1_3   | 21666781  | 20730256    | 95.68                         | 0.852                                | 0.847                                 |
| C4_1   | 26328479  | 24463542    | 92.92                         | 0.848                                | 0.833                                 |
| C4_2   | 29115535  | 26807291    | 92.07                         | 0.848                                | 0.829                                 |
| C4_3   | 23598726  | 22355233    | 94.73                         | 0.846                                | 0.829                                 |
| E4_1   | 22755807  | 21589904    | 94.88                         | 0.864                                | 0.862                                 |

---

|      |          |          |       |       |       |
|------|----------|----------|-------|-------|-------|
| E4_2 | 24131760 | 23103174 | 95.74 | 0.844 | 0.844 |
| E4_3 | 24874510 | 23159858 | 93.11 | 0.847 | 0.824 |

---

77

78

79 **Table S3:** All of DEGs in four transitions and the overlapped genes of transition I and III

| test_id     | June       | August  | January | April  | transitio | transitio | transition | transition | transition |
|-------------|------------|---------|---------|--------|-----------|-----------|------------|------------|------------|
|             |            |         |         |        | n I       | n II      | III        | IV         | I, III     |
| XLOC_013419 | 13.5       | 6.2     | 6.3     | 17.0   | -1.1      | 0.1       | 1.4        | -0.4       | yes        |
| XLOC_003314 | 2.0        | 0.9     | 0.9     | 2.5    | -1.1      | 0.1       | 1.4        | -0.5       | yes        |
| XLOC_022957 | 1.5        | 0.7     | 0.9     | 2.3    | -1.1      | 0.5       | 1.2        | -0.6       | yes        |
| XLOC_023266 | 6.5        | 2.9     | 3.4     | 8.5    | -1.1      | 0.3       | 1.2        | -0.5       | yes        |
| XLOC_025355 | 27.0       | 12.0    | 13.2    | 28.4   | -1.1      | 0.2       | 1.0        | -0.1       | yes        |
| XLOC_021498 | 1.3        | 0.6     | 0.6     | 1.5    | -1.1      | 0.2       | 1.2        | -0.3       | yes        |
| XLOC_016293 | 4.3        | 1.8     | 2.1     | 6.0    | -1.2      | 0.3       | 1.5        | -0.5       | yes        |
| XLOC_016629 | 5.7        | 2.4     | 1.8     | 5.5    | -1.2      | -0.3      | 1.5        | 0.0        | yes        |
| XLOC_006280 | 4.3        | 1.8     | 2.1     | 5.0    | -1.2      | 0.3       | 1.2        | -0.3       | yes        |
| XLOC_002307 | 4.2        | 1.6     | 2.1     | 4.7    | -1.3      | 0.5       | 1.1        | -0.2       | yes        |
| XLOC_002838 | 10.5       | 3.9     | 5.4     | 15.8   | -1.4      | 0.5       | 1.5        | -0.7       | yes        |
| XLOC_027675 | 6.0        | 2.2     | 2.5     | 6.7    | -1.4      | 0.3       | 1.3        | -0.2       | yes        |
| XLOC_024627 | 2.6        | 0.9     | 2.1     | 4.7    | -1.4      | 1.2       | 1.1        | -0.9       | yes        |
| XLOC_014999 | 2.5        | 0.9     | 0.6     | 2.3    | -1.5      | -0.5      | 1.9        | 0.1        | yes        |
| XLOC_025273 | 4.9        | 1.6     | 1.7     | 4.9    | -1.6      | 0.2       | 1.5        | -0.1       | yes        |
| XLOC_014201 | 84.4       | 39.9    | 57.3    | 189.4  | -1.0      | 0.6       | 1.7        | -1.2       | yes        |
| XLOC_007964 | 26.4       | 12.5    | 11.7    | 25.3   | -1.0      | 0.0       | 1.0        | 0.0        | yes        |
| XLOC_023899 | 28.1       | 12.7    | 12.6    | 27.4   | -1.1      | 0.1       | 1.0        | 0.0        | yes        |
| XLOC_007352 | 6.1        | 2.6     | 1.7     | 8.2    | -1.2      | -0.5      | 2.2        | -0.5       | yes        |
| XLOC_014466 | 79.0       | 27.0    | 32.7    | 86.2   | -1.5      | 0.3       | 1.3        | -0.2       | yes        |
| XLOC_013911 | 2.1        | 0.7     | 1.1     | 2.5    | -1.5      | 0.7       | 1.1        | -0.3       | yes        |
| XLOC_014259 | 9.3        | 0.5     | 2.0     | 11.0   | -4.2      | 2.0       | 2.4        | -0.3       | yes        |
| XLOC_005987 | 7.9        | 3.6     | 5.3     | 13.6   | -1.1      | 0.6       | 1.3        | -0.8       | yes        |
| XLOC_018070 | 0.2        | 1.7     | 2.4     | 0.5    | 3.1       | 0.6       | -2.3       | -1.4       | yes        |
| XLOC_002976 | 0.6        | 4.1     | 4.3     | 1.2    | 2.8       | 0.1       | -1.9       | -1.0       | yes        |
| XLOC_001624 | 184.4      | 1242.9  | 1438.8  | 258.8  | 2.8       | 0.3       | -2.5       | -0.6       | yes        |
| XLOC_002880 | 1.4        | 8.4     | 9.6     | 2.5    | 2.7       | 0.3       | -2.0       | -0.9       | yes        |
| XLOC_007003 | 0.7        | 3.3     | 4.9     | 1.1    | 2.4       | 0.6       | -2.2       | -0.8       | yes        |
| XLOC_006420 | 23.6       | 110.0   | 123.7   | 30.5   | 2.3       | 0.2       | -2.1       | -0.4       | yes        |
| XLOC_012220 | 177.4      | 786.1   | 1369.7  | 220.4  | 2.2       | 0.9       | -2.7       | -0.4       | yes        |
| XLOC_022617 | 237.9      | 1055.9  | 1848.7  | 404.2  | 2.2       | 0.9       | -2.3       | -0.8       | yes        |
| XLOC_013571 | 54.8       | 214.4   | 224.1   | 83.0   | 2.0       | 0.1       | -1.5       | -0.7       | yes        |
| XLOC_021916 | 564.8      | 2070.7  | 3399.4  | 664.5  | 1.9       | 0.8       | -2.4       | -0.3       | yes        |
| XLOC_021913 | 42.8       | 142.3   | 327.0   | 64.1   | 1.8       | 1.3       | -2.4       | -0.7       | yes        |
| XLOC_012222 | 528.9      | 1626.6  | 2989.0  | 542.9  | 1.7       | 0.9       | -2.5       | -0.1       | yes        |
| XLOC_001002 | 4.2        | 13.1    | 18.3    | 5.3    | 1.7       | 0.5       | -1.9       | -0.4       | yes        |
| XLOC_017456 | 2.7        | 8.0     | 13.8    | 2.6    | 1.7       | 0.8       | -2.5       | -0.1       | yes        |
| XLOC_020362 | 1023.<br>5 | 2837.4  | 3891.8  | 1436.8 | 1.5       | 0.5       | -1.5       | -0.6       | yes        |
| XLOC_018934 | 7862.      | 21220.2 | 22813.2 | 9590.9 | 1.5       | 0.2       | -1.3       | -0.3       | yes        |

|             | 3          |        |         |        |     |      |      |      |     |
|-------------|------------|--------|---------|--------|-----|------|------|------|-----|
| XLOC_008943 | 2.6        | 6.9    | 7.2     | 3.7    | 1.5 | 0.1  | -1.0 | -0.6 | yes |
| XLOC_012462 | 0.6        | 1.5    | 2.5     | 0.7    | 1.4 | 0.8  | -1.9 | -0.3 | yes |
| XLOC_006264 | 4.9        | 12.1   | 17.7    | 5.3    | 1.4 | 0.6  | -1.8 | -0.2 | yes |
| XLOC_021994 | 0.7        | 1.6    | 2.5     | 0.6    | 1.3 | 0.7  | -2.1 | 0.0  | yes |
| XLOC_011936 | 13.9       | 31.0   | 33.2    | 17.3   | 1.2 | 0.2  | -1.0 | -0.4 | yes |
| XLOC_018022 | 7.4        | 14.5   | 18.9    | 7.5    | 1.0 | 0.4  | -1.4 | -0.1 | yes |
| XLOC_022191 | 25.8       | 50.3   | 63.5    | 29.1   | 1.0 | 0.4  | -1.2 | -0.2 | yes |
| XLOC_012205 | 253.4      | 1399.1 | 2791.6  | 355.4  | 2.6 | 1.1  | -3.0 | -0.6 | yes |
| XLOC_002442 | 56.4       | 274.6  | 468.7   | 71.4   | 2.4 | 0.8  | -2.8 | -0.4 | yes |
| XLOC_012215 | 12.2       | 58.4   | 131.3   | 18.6   | 2.3 | 1.2  | -2.9 | -0.7 | yes |
| XLOC_001920 | 12.2       | 55.2   | 91.8    | 18.2   | 2.3 | 0.8  | -2.4 | -0.6 | yes |
| XLOC_001917 | 597.2      | 2225.8 | 4081.8  | 663.0  | 2.0 | 0.9  | -2.7 | -0.2 | yes |
| XLOC_023409 | 32.0       | 116.9  | 272.7   | 27.4   | 1.9 | 1.3  | -3.4 | 0.2  | yes |
| XLOC_002343 | 809.3      | 2938.1 | 5634.7  | 1270.6 | 1.9 | 1.0  | -2.2 | -0.7 | yes |
| XLOC_012208 | 1704.<br>2 | 6045.8 | 16171.8 | 2947.9 | 1.9 | 1.5  | -2.5 | -0.9 | yes |
| XLOC_012213 | 96.9       | 307.9  | 818.2   | 131.6  | 1.7 | 1.5  | -2.7 | -0.5 | yes |
| XLOC_010587 | 12.2       | 37.1   | 97.9    | 21.7   | 1.7 | 1.5  | -2.2 | -0.9 | yes |
| XLOC_011154 | 47.8       | 142.4  | 224.0   | 59.5   | 1.6 | 0.7  | -2.0 | -0.4 | yes |
| XLOC_024471 | 2.1        | 6.3    | 10.5    | 2.6    | 1.6 | 0.8  | -2.1 | -0.4 | yes |
| XLOC_001437 | 0.8        | 2.1    | 4.3     | 1.2    | 1.4 | 1.1  | -2.0 | -0.6 | yes |
| XLOC_016697 | 47.5       | 115.6  | 174.9   | 58.2   | 1.4 | 0.7  | -1.7 | -0.4 | yes |
| XLOC_012228 | 3.7        | 8.3    | 12.9    | 3.5    | 1.3 | 0.7  | -2.0 | 0.0  | yes |
| XLOC_018375 | 21.4       | 43.9   | 59.5    | 25.2   | 1.1 | 0.5  | -1.3 | -0.3 | yes |
| XLOC_007855 | 146.9      | 294.1  | 595.9   | 168.2  | 1.1 | 1.1  | -1.9 | -0.3 | yes |
| XLOC_021917 | 163.6      | 898.2  | 1471.8  | 361.7  | 2.5 | 0.8  | -2.1 | -1.2 | yes |
| XLOC_003207 | 15.4       | 81.8   | 70.3    | 27.8   | 2.5 | -0.2 | -1.4 | -0.9 | yes |
| XLOC_017970 | 47.6       | 154.2  | 155.4   | 73.9   | 1.8 | 0.1  | -1.1 | -0.7 | yes |
| XLOC_019582 | 472.6      | 1314.1 | 1509.0  | 761.3  | 1.5 | 0.3  | -1.1 | -0.7 | yes |
| XLOC_002440 | 25.5       | 243.1  | 474.1   | 110.3  | 3.3 | 1.0  | -2.2 | -2.2 | yes |
| XLOC_012212 | 126.0      | 550.4  | 1483.4  | 222.8  | 2.2 | 1.5  | -2.8 | -0.9 | yes |
| XLOC_012206 | 186.1      | 784.5  | 1948.7  | 300.6  | 2.2 | 1.4  | -2.8 | -0.8 | yes |
| XLOC_001671 | 560.1      | 1920.2 | 8292.4  | 1317.9 | 1.9 | 2.2  | -2.7 | -1.3 | yes |
| XLOC_012211 | 155.2      | 492.4  | 1973.8  | 313.0  | 1.7 | 2.1  | -2.7 | -1.1 | yes |
| XLOC_012210 | 95.9       | 261.0  | 998.5   | 155.2  | 1.5 | 2.0  | -2.8 | -0.8 | yes |
| XLOC_022573 | 1384.<br>7 | 3384.9 | 9303.9  | 3161.6 | 1.4 | 1.5  | -1.6 | -1.2 | yes |
| XLOC_020785 | 16.4       | 38.9   | 59.7    | 28.3   | 1.3 | 0.7  | -1.1 | -0.9 | yes |
| XLOC_026745 | 0.7        | 3.7    | 1.1     | 0.2    | 2.5 | -1.7 | -2.5 | 1.7  | yes |
| XLOC_016642 | 0.6        | 4.1    | 0.6     | 2.6    | 2.9 | -2.8 | 2.1  | -2.2 | yes |
| XLOC_019589 | 34.2       | 165.5  | 6.0     | 43.0   | 2.3 | -4.7 | 2.8  | -0.4 | yes |
| XLOC_020494 | 0.9        | 3.8    | 0.2     | 1.8    | 2.2 | -3.9 | 2.8  | -1.1 | yes |
| XLOC_020357 | 25.4       | 97.8   | 11.5    | 34.6   | 2.0 | -3.0 | 1.5  | -0.5 | yes |

|             |       |        |       |       |      |      |      |      |     |
|-------------|-------|--------|-------|-------|------|------|------|------|-----|
| XLOC_005503 | 3.7   | 11.1   | 1.2   | 3.8   | 1.7  | -3.1 | 1.6  | -0.1 | yes |
| XLOC_025934 | 0.8   | 3.3    | 2.4   | 0.4   | 2.2  | -0.4 | -2.7 | 0.9  | yes |
| XLOC_001919 | 0.7   | 2.7    | 3.9   | 0.7   | 2.1  | 0.6  | -2.6 | -0.2 | yes |
| XLOC_024801 | 0.5   | 1.8    | 1.5   | 0.5   | 1.9  | -0.2 | -1.8 | 0.0  | yes |
| XLOC_024377 | 0.6   | 1.9    | 3.9   | 0.5   | 1.7  | 1.1  | -3.1 | 0.3  | yes |
| XLOC_017784 | 1.3   | 3.4    | 4.4   | 0.8   | 1.5  | 0.4  | -2.5 | 0.6  | yes |
| XLOC_012231 | 4.4   | 11.7   | 5.6   | 2.5   | 1.4  | -1.0 | -1.2 | 0.8  | yes |
| XLOC_012939 | 7.9   | 20.4   | 13.5  | 5.2   | 1.4  | -0.5 | -1.4 | 0.5  | yes |
| XLOC_022660 | 9.8   | 25.4   | 28.5  | 11.0  | 1.4  | 0.2  | -1.4 | -0.2 | yes |
| XLOC_016481 | 2.8   | 7.1    | 4.1   | 1.0   | 1.4  | -0.7 | -2.0 | 1.3  | yes |
| XLOC_004698 | 2.3   | 5.9    | 5.2   | 2.2   | 1.4  | -0.1 | -1.3 | 0.1  | yes |
| XLOC_008643 | 9.5   | 23.9   | 21.0  | 3.6   | 1.4  | -0.1 | -2.6 | 1.3  | yes |
| XLOC_006183 | 2.7   | 6.7    | 5.1   | 1.2   | 1.4  | -0.3 | -2.2 | 1.1  | yes |
| XLOC_010060 | 1.5   | 3.6    | 3.3   | 0.5   | 1.3  | -0.1 | -2.7 | 1.4  | yes |
| XLOC_015682 | 3.6   | 8.6    | 12.4  | 2.9   | 1.3  | 0.6  | -2.2 | 0.3  | yes |
| XLOC_011231 | 2.7   | 6.2    | 3.9   | 2.0   | 1.2  | -0.6 | -1.0 | 0.4  | yes |
| XLOC_022687 | 1.2   | 2.5    | 1.9   | 0.7   | 1.2  | -0.4 | -1.4 | 0.6  | yes |
| XLOC_003983 | 174.6 | 371.5  | 288.9 | 120.4 | 1.2  | -0.3 | -1.3 | 0.5  | yes |
| XLOC_024374 | 5.8   | 11.5   | 11.2  | 4.4   | 1.0  | 0.0  | -1.4 | 0.4  | yes |
| XLOC_005040 | 41.1  | 18.8   | 15.8  | 36.1  | -1.1 | -0.2 | 1.1  | 0.1  | yes |
| XLOC_023663 | 17.7  | 7.4    | 6.1   | 13.7  | -1.2 | -0.2 | 1.1  | 0.3  | yes |
| XLOC_014487 | 3.9   | 1.4    | 1.4   | 3.1   | -1.4 | 0.1  | 1.0  | 0.3  | yes |
| XLOC_012835 | 2.5   | 0.8    | 0.5   | 1.6   | -1.5 | -0.6 | 1.6  | 0.5  | yes |
| XLOC_004123 | 1.6   | 0.5    | 0.5   | 1.3   | -1.6 | -0.1 | 1.4  | 0.2  | yes |
| XLOC_022912 | 21.7  | 9.3    | 5.5   | 11.9  | -1.2 | -0.7 | 1.0  | 0.8  | yes |
| XLOC_009898 | 354.5 | 148.6  | 105.7 | 283.5 | -1.2 | -0.4 | 1.4  | 0.3  | yes |
| XLOC_025428 | 3.5   | 1.4    | 0.7   | 2.4   | -1.3 | -0.9 | 1.6  | 0.5  | yes |
| XLOC_010050 | 393.9 | 1172.6 | 27.9  | 712.4 | 1.6  | -5.3 | 4.6  | -0.9 | yes |
| XLOC_024364 | 118.2 | 43.8   | 21.9  | 60.3  | -1.4 | -0.9 | 1.4  | 0.9  | yes |
| XLOC_027019 | 184.0 | 83.4   | 115.6 | 57.5  | -1.1 | 0.5  | -1.1 | 1.6  | yes |
| XLOC_007932 | 20.3  | 6.4    | 4.0   | 9.8   | -1.6 | -0.6 | 1.2  | 1.0  | yes |
| XLOC_010861 | 4.2   | 17.4   | 13.4  | 88.4  | 2.1  | -0.3 | 2.6  | -4.4 | yes |
| XLOC_003669 | 5.0   | 14.7   | 9.7   | 21.8  | 1.6  | -0.5 | 1.1  | -2.2 | yes |
| XLOC_022624 | 3.3   | 8.3    | 4.8   | 42.5  | 1.4  | -0.7 | 3.1  | -3.7 | yes |
| XLOC_020364 | 116.8 | 250.5  | 202.3 | 542.5 | 1.2  | -0.3 | 1.4  | -2.3 | yes |
| XLOC_020900 | 195.0 | 62.0   | 34.3  | 80.3  | -1.6 | -0.8 | 1.2  | 1.2  | yes |
| XLOC_022623 | 5.1   | 11.8   | 6.4   | 52.7  | 1.3  | -0.8 | 3.0  | -3.4 | yes |
| XLOC_002881 | 16.7  | 169.3  | 103.2 | 22.4  | 3.4  | -0.7 | -2.3 | -0.5 | yes |
| XLOC_012846 | 30.5  | 206.3  | 182.0 | 51.3  | 2.8  | -0.1 | -1.9 | -0.8 | yes |
| XLOC_017969 | 50.3  | 336.1  | 264.1 | 82.3  | 2.8  | -0.3 | -1.8 | -0.8 | yes |
| XLOC_015943 | 0.4   | 2.0    | 1.6   | 0.5   | 2.4  | -0.2 | -1.7 | -0.5 | yes |
| XLOC_005552 | 18.8  | 57.3   | 44.2  | 21.3  | 1.7  | -0.3 | -1.1 | -0.2 | yes |
| XLOC_012224 | 0.4   | 43.6   | 2.1   | 0.7   | 6.9  | -4.3 | -1.7 | -0.9 | yes |
| XLOC_012223 | 3.2   | 180.6  | 10.2  | 2.9   | 5.9  | -4.1 | -1.9 | 0.1  | yes |

|             |       |        |        |       |     |      |      |      |     |
|-------------|-------|--------|--------|-------|-----|------|------|------|-----|
| XLOC_005227 | 0.5   | 3.5    | 1.1    | 0.3   | 2.8 | -1.6 | -1.9 | 0.7  | yes |
| XLOC_005993 | 27.0  | 174.0  | 76.8   | 32.2  | 2.8 | -1.1 | -1.3 | -0.3 | yes |
| XLOC_017141 | 10.5  | 63.9   | 32.6   | 11.1  | 2.7 | -0.9 | -1.6 | -0.1 | yes |
| XLOC_010262 | 3.1   | 14.6   | 6.1    | 2.9   | 2.3 | -1.2 | -1.1 | 0.0  | yes |
| XLOC_000192 | 92.4  | 248.5  | 16.0   | 44.9  | 1.5 | -3.9 | 1.4  | 1.0  | yes |
| XLOC_015010 | 12.7  | 31.8   | 1.5    | 11.7  | 1.4 | -4.4 | 2.9  | 0.1  | yes |
| XLOC_000191 | 827.4 | 2032.3 | 150.6  | 630.8 | 1.3 | -3.7 | 2.0  | 0.3  | yes |
| XLOC_005992 | 5.8   | 12.7   | 0.9    | 4.2   | 1.2 | -3.8 | 2.2  | 0.4  | yes |
| XLOC_004549 | 0.3   | 4.1    | 3.5    | 0.4   | 4.0 | -0.2 | -3.2 | -0.6 | yes |
| XLOC_023551 | 0.3   | 5.4    | 3.2    | 0.2   | 4.0 | -0.7 | -4.1 | 0.8  | yes |
| XLOC_021720 | 1.6   | 10.9   | 8.5    | 1.6   | 2.9 | -0.3 | -2.4 | -0.1 | yes |
| XLOC_009262 | 0.3   | 1.9    | 1.9    | 0.2   | 2.8 | 0.0  | -3.5 | 0.6  | yes |
| XLOC_019377 | 20.9  | 114.7  | 78.5   | 18.3  | 2.5 | -0.5 | -2.2 | 0.1  | yes |
| XLOC_003274 | 0.5   | 2.7    | 1.7    | 0.4   | 2.5 | -0.6 | -2.0 | 0.1  | yes |
| XLOC_005321 | 1.4   | 7.2    | 6.9    | 1.0   | 2.4 | 0.0  | -2.8 | 0.4  | yes |
| XLOC_012845 | 155.9 | 747.4  | 522.7  | 105.9 | 2.3 | -0.5 | -2.4 | 0.5  | yes |
| XLOC_023727 | 41.0  | 193.9  | 162.1  | 32.6  | 2.3 | -0.2 | -2.4 | 0.3  | yes |
| XLOC_019597 | 23.0  | 105.5  | 85.1   | 25.3  | 2.3 | -0.3 | -1.8 | -0.2 | yes |
| XLOC_002855 | 53.4  | 238.8  | 263.2  | 59.8  | 2.2 | 0.2  | -2.2 | -0.2 | yes |
| XLOC_019791 | 2.6   | 12.0   | 7.3    | 1.6   | 2.2 | -0.7 | -2.3 | 0.7  | yes |
| XLOC_023299 | 1.8   | 7.6    | 6.3    | 1.3   | 2.1 | -0.2 | -2.3 | 0.4  | yes |
| XLOC_019697 | 1.1   | 4.5    | 2.1    | 0.6   | 2.1 | -1.0 | -1.9 | 0.8  | yes |
| XLOC_002367 | 158.0 | 623.2  | 500.2  | 110.7 | 2.1 | -0.3 | -2.2 | 0.4  | yes |
| XLOC_002368 | 239.3 | 934.0  | 1216.4 | 239.7 | 2.1 | 0.4  | -2.4 | -0.1 | yes |
| XLOC_012203 | 9.1   | 35.3   | 45.6   | 7.6   | 2.0 | 0.4  | -2.7 | 0.2  | yes |
| XLOC_012219 | 133.6 | 493.0  | 379.3  | 87.8  | 2.0 | -0.3 | -2.2 | 0.5  | yes |
| XLOC_005274 | 36.1  | 132.1  | 110.4  | 25.6  | 2.0 | -0.2 | -2.2 | 0.4  | yes |
| XLOC_013005 | 37.9  | 138.9  | 138.1  | 32.0  | 1.9 | 0.0  | -2.2 | 0.2  | yes |
| XLOC_023279 | 1.1   | 4.1    | 2.6    | 1.0   | 1.9 | -0.6 | -1.5 | 0.1  | yes |
| XLOC_005330 | 2.7   | 9.9    | 9.7    | 2.4   | 1.9 | 0.0  | -2.1 | 0.1  | yes |
| XLOC_001163 | 552.5 | 1980.4 | 2429.5 | 659.0 | 1.9 | 0.3  | -2.0 | -0.3 | yes |
| XLOC_002342 | 647.4 | 2265.2 | 3308.7 | 531.4 | 1.9 | 0.6  | -2.7 | 0.2  | yes |
| XLOC_001911 | 938.6 | 3245.1 | 5629.3 | 797.1 | 1.9 | 0.9  | -2.9 | 0.2  | yes |
| XLOC_012207 | 39.1  | 133.6  | 139.6  | 28.1  | 1.9 | 0.1  | -2.4 | 0.4  | yes |
| XLOC_022270 | 142.4 | 487.5  | 895.4  | 123.5 | 1.9 | 0.9  | -2.9 | 0.1  | yes |
| XLOC_015941 | 39.2  | 135.2  | 115.4  | 41.4  | 1.9 | -0.2 | -1.5 | -0.1 | yes |
| XLOC_019475 | 217.5 | 729.6  | 698.3  | 164.1 | 1.8 | 0.0  | -2.2 | 0.3  | yes |
| XLOC_001922 | 38.4  | 127.4  | 106.6  | 25.7  | 1.8 | -0.2 | -2.1 | 0.5  | yes |
| XLOC_007862 | 28.4  | 94.6   | 83.6   | 19.5  | 1.8 | -0.1 | -2.2 | 0.5  | yes |
| XLOC_012204 | 9.5   | 31.7   | 29.5   | 8.1   | 1.8 | 0.0  | -1.9 | 0.2  | yes |
| XLOC_001921 | 263.8 | 866.6  | 988.8  | 194.4 | 1.8 | 0.2  | -2.4 | 0.4  | yes |
| XLOC_006150 | 1.4   | 4.7    | 6.7    | 1.2   | 1.8 | 0.6  | -2.6 | 0.2  | yes |
| XLOC_019596 | 10.6  | 34.2   | 32.8   | 9.6   | 1.8 | 0.0  | -1.8 | 0.1  | yes |
| XLOC_022452 | 15.1  | 46.4   | 70.2   | 11.9  | 1.7 | 0.7  | -2.6 | 0.3  | yes |

|             |       |        |        |       |     |      |      |      |     |
|-------------|-------|--------|--------|-------|-----|------|------|------|-----|
| XLOC_015433 | 0.6   | 2.0    | 1.6    | 0.5   | 1.7 | -0.2 | -1.7 | 0.2  | yes |
| XLOC_001167 | 142.6 | 433.9  | 431.3  | 69.4  | 1.7 | 0.0  | -2.7 | 1.0  | yes |
| XLOC_017933 | 0.9   | 2.8    | 2.9    | 1.0   | 1.7 | 0.1  | -1.6 | -0.2 | yes |
| XLOC_012218 | 126.8 | 377.7  | 524.0  | 102.2 | 1.7 | 0.5  | -2.4 | 0.2  | yes |
| XLOC_020660 | 5.0   | 15.0   | 14.1   | 5.9   | 1.7 | 0.0  | -1.3 | -0.3 | yes |
| XLOC_023332 | 23.9  | 70.2   | 84.2   | 16.6  | 1.6 | 0.3  | -2.4 | 0.5  | yes |
| XLOC_004647 | 22.1  | 64.3   | 58.5   | 13.0  | 1.6 | -0.1 | -2.2 | 0.7  | yes |
| XLOC_005288 | 157.2 | 459.3  | 445.6  | 105.9 | 1.6 | 0.0  | -2.1 | 0.5  | yes |
| XLOC_001912 | 916.6 | 2647.8 | 3834.4 | 388.9 | 1.6 | 0.6  | -3.4 | 1.2  | yes |
| XLOC_025517 | 3.4   | 9.8    | 10.4   | 2.2   | 1.6 | 0.1  | -2.3 | 0.6  | yes |
| XLOC_012479 | 1.2   | 3.6    | 2.6    | 0.7   | 1.6 | -0.4 | -1.8 | 0.7  | yes |
| XLOC_000950 | 416.5 | 1168.7 | 1060.4 | 251.8 | 1.6 | -0.1 | -2.1 | 0.6  | yes |
| XLOC_004410 | 11.1  | 31.5   | 30.2   | 7.8   | 1.6 | 0.0  | -2.0 | 0.5  | yes |
| XLOC_020918 | 1.6   | 4.7    | 6.1    | 1.2   | 1.6 | 0.4  | -2.4 | 0.4  | yes |
| XLOC_000403 | 3.7   | 10.5   | 10.1   | 2.5   | 1.6 | 0.0  | -2.1 | 0.5  | yes |
| XLOC_010129 | 14.4  | 40.6   | 46.5   | 16.4  | 1.6 | 0.3  | -1.6 | -0.3 | yes |
| XLOC_021227 | 2.3   | 6.6    | 5.3    | 1.5   | 1.6 | -0.3 | -1.8 | 0.5  | yes |
| XLOC_027137 | 0.7   | 2.1    | 1.4    | 0.5   | 1.6 | -0.5 | -1.5 | 0.4  | yes |
| XLOC_014187 | 1.1   | 3.1    | 2.3    | 1.0   | 1.6 | -0.4 | -1.2 | 0.0  | yes |
| XLOC_021914 | 20.1  | 56.1   | 68.7   | 18.3  | 1.6 | 0.3  | -2.0 | 0.1  | yes |
| XLOC_017622 | 11.4  | 31.8   | 34.8   | 12.5  | 1.6 | 0.2  | -1.5 | -0.2 | yes |
| XLOC_012226 | 257.4 | 708.8  | 630.1  | 134.6 | 1.5 | -0.1 | -2.3 | 0.9  | yes |
| XLOC_000648 | 1.5   | 4.0    | 2.6    | 0.7   | 1.5 | -0.6 | -2.0 | 1.0  | yes |
| XLOC_012586 | 4.3   | 11.6   | 8.8    | 3.1   | 1.5 | -0.3 | -1.6 | 0.4  | yes |
| XLOC_002856 | 644.6 | 1722.4 | 3057.4 | 353.7 | 1.5 | 0.9  | -3.2 | 0.8  | yes |
| XLOC_021915 | 332.9 | 899.7  | 1282.3 | 293.2 | 1.5 | 0.6  | -2.2 | 0.1  | yes |
| XLOC_006152 | 20.4  | 54.9   | 65.8   | 13.0  | 1.5 | 0.3  | -2.4 | 0.6  | yes |
| XLOC_022355 | 0.9   | 2.4    | 1.6    | 0.4   | 1.5 | -0.5 | -2.1 | 1.1  | yes |
| XLOC_012123 | 2.9   | 7.8    | 7.5    | 1.7   | 1.5 | 0.0  | -2.2 | 0.7  | yes |
| XLOC_018334 | 1.5   | 4.0    | 4.5    | 1.2   | 1.5 | 0.2  | -2.0 | 0.3  | yes |
| XLOC_012217 | 9.1   | 23.9   | 22.8   | 4.8   | 1.5 | 0.0  | -2.3 | 0.8  | yes |
| XLOC_019476 | 0.6   | 1.7    | 2.2    | 0.4   | 1.5 | 0.5  | -2.6 | 0.6  | yes |
| XLOC_011764 | 2.0   | 5.2    | 4.1    | 1.7   | 1.5 | -0.3 | -1.3 | 0.1  | yes |
| XLOC_011489 | 93.1  | 241.3  | 879.0  | 88.6  | 1.5 | 1.9  | -3.4 | 0.0  | yes |
| XLOC_012214 | 138.8 | 361.5  | 1240.4 | 147.7 | 1.5 | 1.8  | -3.1 | -0.2 | yes |
| XLOC_006989 | 10.5  | 27.9   | 19.9   | 7.7   | 1.5 | -0.4 | -1.4 | 0.4  | yes |
| XLOC_019031 | 17.7  | 46.2   | 59.3   | 12.4  | 1.5 | 0.4  | -2.3 | 0.4  | yes |
| XLOC_013689 | 16.7  | 42.7   | 54.6   | 10.7  | 1.4 | 0.4  | -2.4 | 0.6  | yes |
| XLOC_000455 | 1.2   | 3.2    | 6.2    | 0.8   | 1.4 | 1.0  | -3.0 | 0.5  | yes |
| XLOC_002702 | 2.6   | 6.6    | 4.4    | 1.7   | 1.4 | -0.5 | -1.5 | 0.6  | yes |
| XLOC_012227 | 6.6   | 16.8   | 20.4   | 5.5   | 1.4 | 0.3  | -2.0 | 0.2  | yes |
| XLOC_020923 | 24.1  | 60.6   | 79.0   | 22.4  | 1.4 | 0.4  | -1.9 | 0.0  | yes |
| XLOC_011485 | 18.8  | 46.0   | 198.4  | 17.2  | 1.4 | 2.2  | -3.6 | 0.0  | yes |
| XLOC_016526 | 16.2  | 40.3   | 55.6   | 9.3   | 1.4 | 0.5  | -2.6 | 0.7  | yes |



|             |       |        |       |       |     |      |      |      |     |
|-------------|-------|--------|-------|-------|-----|------|------|------|-----|
| XLOC_020916 | 1.3   | 3.2    | 5.1   | 1.0   | 1.4 | 0.8  | -2.4 | 0.3  | yes |
| XLOC_020365 | 104.0 | 256.7  | 230.4 | 65.8  | 1.4 | -0.1 | -1.9 | 0.6  | yes |
| XLOC_003917 | 13.5  | 33.4   | 26.7  | 13.6  | 1.4 | -0.3 | -1.0 | -0.1 | yes |
| XLOC_010526 | 34.3  | 83.8   | 74.6  | 23.9  | 1.4 | -0.1 | -1.7 | 0.5  | yes |
| XLOC_017796 | 13.4  | 32.8   | 23.4  | 11.6  | 1.4 | -0.4 | -1.1 | 0.2  | yes |
| XLOC_018184 | 11.8  | 28.8   | 24.8  | 10.5  | 1.4 | -0.2 | -1.3 | 0.1  | yes |
| XLOC_023939 | 15.5  | 38.0   | 27.4  | 8.9   | 1.4 | -0.4 | -1.7 | 0.8  | yes |
| XLOC_012563 | 7.3   | 17.7   | 16.0  | 5.7   | 1.3 | -0.1 | -1.5 | 0.3  | yes |
| XLOC_012448 | 2.3   | 5.4    | 9.5   | 1.5   | 1.3 | 0.9  | -2.7 | 0.5  | yes |
| XLOC_015440 | 21.0  | 50.3   | 40.2  | 15.3  | 1.3 | -0.3 | -1.5 | 0.4  | yes |
| XLOC_026747 | 245.3 | 588.5  | 600.3 | 159.5 | 1.3 | 0.1  | -2.0 | 0.6  | yes |
| XLOC_006556 | 4.3   | 10.4   | 12.8  | 4.8   | 1.3 | 0.4  | -1.5 | -0.2 | yes |
| XLOC_021983 | 18.6  | 44.0   | 34.3  | 17.9  | 1.3 | -0.3 | -1.0 | 0.0  | yes |
| XLOC_006247 | 1.8   | 4.4    | 7.0   | 1.3   | 1.3 | 0.7  | -2.5 | 0.5  | yes |
| XLOC_005524 | 5.6   | 13.1   | 9.1   | 4.5   | 1.3 | -0.5 | -1.1 | 0.2  | yes |
| XLOC_010973 | 464.0 | 1074.9 | 835.4 | 405.7 | 1.3 | -0.3 | -1.1 | 0.1  | yes |
| XLOC_013366 | 9.1   | 20.9   | 19.8  | 9.1   | 1.3 | 0.0  | -1.2 | -0.1 | yes |
| XLOC_019689 | 4.8   | 10.9   | 13.6  | 4.6   | 1.3 | 0.4  | -1.6 | 0.0  | yes |
| XLOC_011199 | 30.8  | 69.4   | 95.9  | 20.3  | 1.3 | 0.5  | -2.3 | 0.5  | yes |
| XLOC_023354 | 55.7  | 127.5  | 155.6 | 54.0  | 1.3 | 0.3  | -1.6 | 0.0  | yes |
| XLOC_021909 | 50.3  | 114.1  | 134.1 | 27.5  | 1.3 | 0.3  | -2.4 | 0.8  | yes |
| XLOC_023847 | 8.0   | 18.1   | 15.6  | 5.6   | 1.3 | -0.2 | -1.5 | 0.4  | yes |
| XLOC_006578 | 1.8   | 4.1    | 4.3   | 0.8   | 1.2 | 0.1  | -2.4 | 1.0  | yes |
| XLOC_006223 | 11.6  | 26.2   | 23.1  | 10.1  | 1.2 | -0.1 | -1.3 | 0.1  | yes |
| XLOC_003976 | 2.8   | 6.2    | 5.2   | 2.5   | 1.2 | -0.2 | -1.1 | 0.1  | yes |
| XLOC_013141 | 1.6   | 3.5    | 4.4   | 1.0   | 1.2 | 0.4  | -2.3 | 0.7  | yes |
| XLOC_005965 | 7.3   | 16.1   | 16.4  | 6.0   | 1.2 | 0.1  | -1.5 | 0.2  | yes |
| XLOC_016324 | 15.4  | 33.6   | 35.2  | 16.8  | 1.2 | 0.1  | -1.1 | -0.2 | yes |
| XLOC_020155 | 1.3   | 2.7    | 3.5   | 0.7   | 1.2 | 0.4  | -2.4 | 0.8  | yes |
| XLOC_016467 | 5.2   | 11.2   | 14.6  | 3.7   | 1.2 | 0.4  | -2.0 | 0.4  | yes |
| XLOC_008415 | 3.8   | 8.3    | 9.9   | 4.0   | 1.2 | 0.3  | -1.4 | -0.1 | yes |
| XLOC_011470 | 110.5 | 235.8  | 225.7 | 106.4 | 1.2 | 0.0  | -1.2 | 0.0  | yes |
| XLOC_016139 | 13.1  | 28.5   | 32.8  | 10.8  | 1.2 | 0.3  | -1.7 | 0.2  | yes |
| XLOC_017567 | 14.7  | 31.1   | 44.4  | 11.2  | 1.2 | 0.6  | -2.1 | 0.3  | yes |
| XLOC_003330 | 48.0  | 101.7  | 78.4  | 33.4  | 1.2 | -0.3 | -1.3 | 0.5  | yes |
| XLOC_013888 | 3.2   | 6.8    | 5.5   | 1.7   | 1.2 | -0.2 | -1.8 | 0.8  | yes |
| XLOC_003333 | 21.3  | 45.4   | 43.5  | 22.7  | 1.2 | 0.0  | -1.0 | -0.1 | yes |
| XLOC_004315 | 6.1   | 12.8   | 11.4  | 4.6   | 1.1 | -0.1 | -1.4 | 0.3  | yes |
| XLOC_026717 | 14.0  | 29.7   | 31.7  | 13.7  | 1.1 | 0.2  | -1.3 | 0.0  | yes |
| XLOC_014848 | 33.2  | 70.9   | 61.0  | 28.5  | 1.1 | -0.2 | -1.2 | 0.2  | yes |
| XLOC_003843 | 1.9   | 4.1    | 4.7   | 1.4   | 1.1 | 0.3  | -1.8 | 0.4  | yes |
| XLOC_022661 | 97.1  | 202.0  | 220.1 | 77.5  | 1.1 | 0.2  | -1.6 | 0.3  | yes |
| XLOC_002779 | 27.5  | 57.5   | 56.5  | 21.8  | 1.1 | 0.0  | -1.4 | 0.3  | yes |
| XLOC_018577 | 9.5   | 19.7   | 22.9  | 8.2   | 1.1 | 0.3  | -1.5 | 0.1  | yes |

|             |       |        |        |       |      |      |      |      |     |
|-------------|-------|--------|--------|-------|------|------|------|------|-----|
| XLOC_004082 | 3.3   | 6.9    | 9.5    | 2.2   | 1.1  | 0.5  | -2.2 | 0.5  | yes |
| XLOC_020039 | 184.7 | 386.9  | 350.7  | 109.3 | 1.1  | -0.1 | -1.8 | 0.7  | yes |
| XLOC_013438 | 3.0   | 6.2    | 9.4    | 1.9   | 1.1  | 0.6  | -2.4 | 0.6  | yes |
| XLOC_011633 | 2.7   | 5.6    | 6.2    | 2.8   | 1.1  | 0.2  | -1.2 | -0.1 | yes |
| XLOC_004534 | 21.6  | 44.3   | 39.4   | 16.3  | 1.1  | -0.1 | -1.3 | 0.4  | yes |
| XLOC_002111 | 93.6  | 188.5  | 329.4  | 66.5  | 1.1  | 0.9  | -2.4 | 0.4  | yes |
| XLOC_001913 | 952.3 | 1921.1 | 4765.2 | 550.7 | 1.1  | 1.4  | -3.2 | 0.7  | yes |
| XLOC_010277 | 5.4   | 10.7   | 10.0   | 3.6   | 1.1  | 0.0  | -1.5 | 0.5  | yes |
| XLOC_009661 | 2.5   | 5.1    | 5.6    | 1.5   | 1.1  | 0.2  | -2.0 | 0.7  | yes |
| XLOC_012978 | 4.6   | 9.3    | 7.2    | 3.6   | 1.1  | -0.3 | -1.0 | 0.3  | yes |
| XLOC_010178 | 18.4  | 36.9   | 42.2   | 20.1  | 1.1  | 0.2  | -1.1 | -0.2 | yes |
| XLOC_008156 | 19.3  | 38.8   | 35.1   | 16.9  | 1.1  | -0.1 | -1.1 | 0.1  | yes |
| XLOC_022616 | 51.6  | 103.7  | 108.0  | 33.8  | 1.1  | 0.1  | -1.7 | 0.6  | yes |
| XLOC_019588 | 20.0  | 40.1   | 65.5   | 10.6  | 1.1  | 0.8  | -2.7 | 0.9  | yes |
| XLOC_009868 | 17.8  | 35.5   | 30.3   | 14.5  | 1.1  | -0.2 | -1.1 | 0.2  | yes |
| XLOC_012122 | 8.7   | 17.3   | 16.4   | 5.2   | 1.1  | 0.0  | -1.7 | 0.7  | yes |
| XLOC_006686 | 2.0   | 4.1    | 3.2    | 1.7   | 1.1  | -0.3 | -1.0 | 0.2  | yes |
| XLOC_027864 | 8.2   | 16.1   | 14.1   | 7.2   | 1.1  | -0.1 | -1.0 | 0.1  | yes |
| XLOC_011323 | 12.5  | 24.5   | 22.0   | 7.9   | 1.1  | -0.1 | -1.5 | 0.6  | yes |
| XLOC_006358 | 331.1 | 643.0  | 578.2  | 222.3 | 1.0  | -0.1 | -1.4 | 0.5  | yes |
| XLOC_005927 | 16.2  | 31.7   | 29.9   | 12.4  | 1.0  | 0.0  | -1.3 | 0.3  | yes |
| XLOC_023320 | 32.1  | 62.6   | 72.1   | 29.3  | 1.0  | 0.3  | -1.4 | 0.1  | yes |
| XLOC_024481 | 5.0   | 9.9    | 11.8   | 5.5   | 1.0  | 0.3  | -1.2 | -0.2 | yes |
| XLOC_008118 | 15.6  | 30.3   | 25.8   | 7.5   | 1.0  | -0.2 | -1.9 | 1.0  | yes |
| XLOC_012954 | 10.3  | 19.9   | 24.0   | 11.2  | 1.0  | 0.3  | -1.2 | -0.2 | yes |
| XLOC_011707 | 29.0  | 55.8   | 79.9   | 22.9  | 1.0  | 0.6  | -1.9 | 0.3  | yes |
| XLOC_006483 | 1.8   | 3.4    | 3.4    | 1.5   | 1.0  | 0.0  | -1.2 | 0.2  | yes |
| XLOC_011239 | 2.4   | 4.6    | 4.8    | 2.5   | 1.0  | 0.1  | -1.0 | -0.1 | yes |
| XLOC_015426 | 14.7  | 28.3   | 32.1   | 13.1  | 1.0  | 0.2  | -1.4 | 0.1  | yes |
| XLOC_025957 | 3.4   | 1.5    | 1.2    | 2.8   | -1.2 | -0.3 | 1.2  | 0.2  | yes |
| XLOC_021734 | 10.5  | 4.5    | 4.2    | 9.1   | -1.2 | -0.1 | 1.1  | 0.2  | yes |
| XLOC_020141 | 49.6  | 18.6   | 16.9   | 42.9  | -1.4 | -0.1 | 1.3  | 0.2  | yes |
| XLOC_005802 | 32.9  | 12.1   | 10.8   | 28.2  | -1.4 | -0.1 | 1.3  | 0.2  | yes |
| XLOC_007232 | 15.2  | 5.2    | 4.4    | 9.7   | -1.5 | -0.2 | 1.1  | 0.6  | yes |
| XLOC_017800 | 11.3  | 3.4    | 2.4    | 8.9   | -1.7 | -0.4 | 1.8  | 0.3  | yes |
| XLOC_011745 | 2.0   | 0.5    | 0.6    | 1.4   | -1.8 | 0.2  | 1.1  | 0.4  | yes |
| XLOC_002916 | 35.2  | 2.7    | 4.3    | 19.1  | -3.7 | 0.7  | 2.1  | 0.8  | yes |
| XLOC_001341 | 71.9  | 31.3   | 45.5   | 21.1  | -1.2 | 0.6  | -1.2 | 1.7  | yes |
| XLOC_013628 | 13.8  | 52.3   | 35.0   | 5.9   | 2.0  | -0.5 | -2.6 | 1.2  | yes |
| XLOC_019378 | 3.3   | 11.8   | 8.7    | 1.2   | 1.9  | -0.4 | -3.0 | 1.4  | yes |
| XLOC_019583 | 132.7 | 457.0  | 309.0  | 74.4  | 1.9  | -0.5 | -2.1 | 0.8  | yes |
| XLOC_015967 | 203.8 | 692.4  | 692.5  | 118.9 | 1.8  | 0.1  | -2.6 | 0.7  | yes |
| XLOC_020367 | 95.5  | 321.8  | 384.4  | 45.6  | 1.8  | 0.3  | -3.1 | 1.0  | yes |
| XLOC_020036 | 3.9   | 12.7   | 9.5    | 1.1   | 1.8  | -0.4 | -3.2 | 1.8  | yes |

|             |       |        |        |       |      |      |      |      |     |
|-------------|-------|--------|--------|-------|------|------|------|------|-----|
| XLOC_019607 | 23.9  | 76.5   | 70.7   | 12.8  | 1.7  | 0.0  | -2.5 | 0.8  | yes |
| XLOC_003097 | 11.4  | 32.4   | 16.6   | 5.2   | 1.6  | -0.9 | -1.7 | 1.1  | yes |
| XLOC_012195 | 38.5  | 109.0  | 105.7  | 19.4  | 1.6  | 0.0  | -2.5 | 0.9  | yes |
| XLOC_007042 | 157.5 | 441.1  | 199.0  | 83.4  | 1.6  | -1.1 | -1.3 | 0.9  | yes |
| XLOC_012197 | 51.7  | 142.8  | 127.0  | 21.0  | 1.5  | -0.1 | -2.7 | 1.2  | yes |
| XLOC_018296 | 11.3  | 30.6   | 24.5   | 5.9   | 1.5  | -0.3 | -2.1 | 0.9  | yes |
| XLOC_014353 | 11.7  | 31.6   | 24.6   | 5.0   | 1.5  | -0.3 | -2.4 | 1.2  | yes |
| XLOC_012225 | 52.8  | 136.4  | 111.0  | 28.4  | 1.4  | -0.2 | -2.0 | 0.8  | yes |
| XLOC_003064 | 18.7  | 47.4   | 56.8   | 6.9   | 1.4  | 0.3  | -3.1 | 1.3  | yes |
| XLOC_004805 | 14.3  | 35.9   | 22.6   | 4.9   | 1.4  | -0.6 | -2.3 | 1.5  | yes |
| XLOC_022591 | 42.9  | 104.7  | 106.2  | 24.7  | 1.4  | 0.1  | -2.2 | 0.7  | yes |
| XLOC_026233 | 26.3  | 60.4   | 57.0   | 14.7  | 1.3  | 0.0  | -2.0 | 0.8  | yes |
| XLOC_017436 | 7.4   | 17.1   | 12.2   | 3.4   | 1.3  | -0.4 | -1.9 | 1.0  | yes |
| XLOC_026148 | 11.5  | 24.5   | 23.2   | 4.2   | 1.2  | 0.0  | -2.5 | 1.4  | yes |
| XLOC_007041 | 716.0 | 1528.6 | 1426.8 | 367.6 | 1.2  | 0.0  | -2.0 | 0.9  | yes |
| XLOC_013599 | 57.3  | 118.7  | 118.2  | 25.2  | 1.1  | 0.0  | -2.3 | 1.1  | yes |
| XLOC_001168 | 43.9  | 90.5   | 88.1   | 17.6  | 1.1  | 0.0  | -2.4 | 1.3  | yes |
| XLOC_021570 | 0.9   | 1.8    | 1.4    | 0.4   | 1.1  | -0.3 | -2.0 | 1.3  | yes |
| XLOC_001578 | 222.0 | 450.0  | 574.7  | 136.8 | 1.1  | 0.4  | -2.1 | 0.6  | yes |
| XLOC_005126 | 5.5   | 10.9   | 7.4    | 2.7   | 1.1  | -0.5 | -1.5 | 1.0  | yes |
| XLOC_018456 | 20.3  | 39.6   | 44.2   | 10.3  | 1.0  | 0.2  | -2.2 | 0.9  | yes |
| XLOC_011412 | 58.3  | 112.6  | 122.0  | 35.3  | 1.0  | 0.2  | -1.9 | 0.7  | yes |
| XLOC_022803 | 6.8   | 13.1   | 9.3    | 2.3   | 1.0  | -0.4 | -2.1 | 1.5  | yes |
| XLOC_013652 | 24.6  | 47.2   | 41.0   | 11.0  | 1.0  | -0.1 | -2.0 | 1.1  | yes |
| XLOC_009555 | 7.2   | 2.5    | 1.7    | 4.3   | -1.5 | -0.5 | 1.2  | 0.7  | yes |
| XLOC_001332 | 13.8  | 3.5    | 1.9    | 4.4   | -1.9 | -0.8 | 1.2  | 1.6  | yes |
| XLOC_004262 | 12.2  | 1.7    | 2.2    | 6.9   | -2.8 | 0.4  | 1.6  | 0.8  | yes |
| XLOC_010211 | 2.3   | 8.5    | 8.0    | 54.6  | 2.0  | 0.0  | 2.7  | -4.6 | yes |
| XLOC_020368 | 17.5  | 39.9   | 37.0   | 91.5  | 1.3  | 0.0  | 1.2  | -2.4 | yes |
| XLOC_023794 | 4.8   | 1.9    | 0.7    | 2.2   | -1.3 | -1.4 | 1.5  | 1.1  | yes |
| XLOC_021908 | 8.2   | 22.6   | 0.2    | 15.9  | 1.5  | -6.9 | 6.3  | -1.0 | yes |
| XLOC_009050 | 6.2   | 12.7   | 19.1   | 62.8  | 1.1  | 0.6  | 1.6  | -3.4 | yes |
| XLOC_001139 | 8.8   | 4.2    | 5.7    | 8.6   | -1.0 | 0.5  | 0.5  | 0.0  |     |
| XLOC_009548 | 3.9   | 1.8    | 2.5    | 4.3   | -1.0 | 0.5  | 0.8  | -0.2 |     |
| XLOC_010540 | 8.9   | 4.2    | 7.0    | 9.7   | -1.0 | 0.8  | 0.4  | -0.2 |     |
| XLOC_020860 | 1.7   | 0.8    | 1.2    | 1.8   | -1.1 | 0.7  | 0.5  | -0.1 |     |
| XLOC_023910 | 5.9   | 2.7    | 3.8    | 4.8   | -1.1 | 0.6  | 0.3  | 0.2  |     |
| XLOC_009687 | 6.5   | 2.9    | 4.5    | 5.5   | -1.1 | 0.7  | 0.2  | 0.2  |     |
| XLOC_026077 | 2.4   | 1.1    | 1.6    | 1.8   | -1.1 | 0.6  | 0.2  | 0.3  |     |
| XLOC_005878 | 6.9   | 3.1    | 5.1    | 7.3   | -1.1 | 0.8  | 0.5  | -0.1 |     |
| XLOC_005158 | 2.6   | 1.2    | 2.2    | 2.8   | -1.1 | 1.0  | 0.3  | -0.2 |     |
| XLOC_026211 | 3.3   | 1.5    | 2.4    | 3.5   | -1.1 | 0.8  | 0.5  | -0.1 |     |
| XLOC_014667 | 1.4   | 0.6    | 1.2    | 2.0   | -1.1 | 1.0  | 0.7  | -0.6 |     |
| XLOC_017240 | 7.6   | 3.3    | 5.8    | 8.9   | -1.2 | 0.9  | 0.5  | -0.3 |     |

---

|             |       |       |       |       |        |      |      |      |
|-------------|-------|-------|-------|-------|--------|------|------|------|
| XLOC_009334 | 3.3   | 1.4   | 2.4   | 3.0   | -1.2   | 0.8  | 0.2  | 0.1  |
| XLOC_007950 | 6.8   | 2.9   | 6.5   | 7.2   | -1.2   | 1.2  | 0.1  | -0.1 |
| XLOC_004565 | 76.4  | 31.7  | 46.9  | 52.8  | -1.2   | 0.6  | 0.1  | 0.5  |
| XLOC_006390 | 3.4   | 1.4   | 2.1   | 3.5   | -1.2   | 0.6  | 0.7  | -0.1 |
| XLOC_019627 | 4.8   | 1.9   | 2.8   | 3.8   | -1.2   | 0.6  | 0.4  | 0.3  |
| XLOC_017389 | 4.1   | 1.7   | 2.9   | 4.2   | -1.2   | 0.9  | 0.5  | -0.1 |
| XLOC_011962 | 3.3   | 1.3   | 1.9   | 3.0   | -1.3   | 0.5  | 0.6  | 0.1  |
| XLOC_010701 | 4.7   | 1.9   | 2.9   | 4.2   | -1.3   | 0.7  | 0.5  | 0.1  |
| XLOC_009684 | 1.4   | 0.6   | 1.0   | 1.8   | -1.3   | 0.8  | 0.8  | -0.4 |
| XLOC_026751 | 21.5  | 8.5   | 12.7  | 16.6  | -1.3   | 0.6  | 0.3  | 0.3  |
| XLOC_014056 | 1.6   | 0.6   | 0.9   | 1.3   | -1.3   | 0.7  | 0.4  | 0.2  |
| XLOC_000771 | 1.4   | 0.5   | 0.9   | 1.4   | -1.3   | 0.8  | 0.6  | -0.1 |
| XLOC_015319 | 170.8 | 64.5  | 136.2 | 174.3 | -1.3   | 1.1  | 0.3  | -0.1 |
| XLOC_001879 | 5.3   | 2.0   | 2.9   | 4.5   | -1.4   | 0.6  | 0.5  | 0.2  |
| XLOC_001699 | 37.1  | 13.4  | 20.7  | 26.4  | -1.4   | 0.7  | 0.3  | 0.4  |
| XLOC_011049 | 1.8   | 0.6   | 1.0   | 1.2   | -1.5   | 0.7  | 0.2  | 0.5  |
| XLOC_005494 | 2.9   | 1.0   | 1.7   | 3.3   | -1.5   | 0.9  | 0.9  | -0.2 |
| XLOC_010679 | 1.9   | 0.6   | 0.8   | 2.0   | -1.6   | 0.4  | 1.3  | -0.1 |
| XLOC_007013 | 8.8   | 2.8   | 4.6   | 6.2   | -1.6   | 0.8  | 0.4  | 0.5  |
| XLOC_019971 | 3.2   | 1.0   | 1.7   | 2.7   | -1.6   | 0.8  | 0.6  | 0.2  |
| XLOC_012301 | 1.6   | 0.5   | 0.9   | 1.4   | -1.7   | 0.8  | 0.7  | 0.2  |
| XLOC_020295 | 4.9   | 1.1   | 2.3   | 4.8   | -2.0   | 1.1  | 1.0  | 0.0  |
| XLOC_000956 | 1.0   | 0.0   | 1.2   | 4.3   | #NAME? | inf  | 1.8  | -2.2 |
| XLOC_001538 | 113.7 | 63.7  | 143.2 | 170.0 | -0.8   | 1.2  | 0.2  | -0.6 |
| XLOC_019000 | 109.3 | 51.8  | 77.0  | 84.7  | -1.0   | 0.6  | 0.1  | 0.3  |
| XLOC_022054 | 217.0 | 101.3 | 250.9 | 309.5 | -1.0   | 1.4  | 0.2  | -0.6 |
| XLOC_002802 | 1.6   | 0.7   | 1.7   | 2.4   | -1.1   | 1.3  | 0.4  | -0.6 |
| XLOC_000627 | 19.7  | 8.6   | 18.0  | 13.5  | -1.2   | 1.1  | -0.5 | 0.5  |
| XLOC_018534 | 7.2   | 2.9   | 6.2   | 7.1   | -1.2   | 1.1  | 0.1  | 0.0  |
| XLOC_014440 | 4.5   | 1.7   | 5.0   | 6.2   | -1.3   | 1.6  | 0.2  | -0.5 |
| XLOC_021987 | 4.1   | 1.6   | 2.9   | 3.6   | -1.3   | 1.0  | 0.2  | 0.1  |
| XLOC_023972 | 5.3   | 1.3   | 6.4   | 6.4   | -2.0   | 2.4  | -0.1 | -0.3 |
| XLOC_008509 | 1.8   | 0.4   | 1.0   | 1.7   | -2.0   | 1.3  | 0.8  | 0.0  |
| XLOC_011073 | 3.3   | 1.8   | 4.0   | 4.6   | -0.6   | 1.2  | 0.2  | -0.8 |
| XLOC_018817 | 2.0   | 1.2   | 2.4   | 3.1   | -0.7   | 1.1  | 0.3  | -0.7 |
| XLOC_024382 | 0.9   | 0.5   | 1.3   | 1.5   | -0.7   | 1.4  | 0.1  | -0.8 |
| XLOC_020713 | 1.8   | 1.1   | 2.8   | 3.1   | -0.7   | 1.5  | 0.0  | -0.8 |
| XLOC_026024 | 1.9   | 1.1   | 3.0   | 3.8   | -0.7   | 1.5  | 0.3  | -1.0 |
| XLOC_001409 | 1.3   | 0.8   | 1.9   | 2.0   | -0.8   | 1.3  | 0.0  | -0.6 |
| XLOC_016552 | 22.9  | 13.9  | 10.7  | 25.0  | -0.7   | -0.3 | 1.2  | -0.2 |
| XLOC_016356 | 18.9  | 11.4  | 8.2   | 21.0  | -0.7   | -0.4 | 1.3  | -0.2 |
| XLOC_006455 | 6.3   | 3.4   | 3.7   | 8.0   | -0.8   | 0.2  | 1.1  | -0.4 |
| XLOC_008425 | 3.5   | 1.9   | 1.5   | 3.4   | -0.9   | -0.3 | 1.1  | 0.0  |
| XLOC_020601 | 2.1   | 1.1   | 1.0   | 2.0   | -0.9   | -0.1 | 1.0  | 0.0  |

---

---

|             |       |      |      |       |      |      |     |      |
|-------------|-------|------|------|-------|------|------|-----|------|
| XLOC_014131 | 6.1   | 3.2  | 3.1  | 7.4   | -0.9 | 0.0  | 1.2 | -0.3 |
| XLOC_000205 | 1.3   | 0.7  | 0.9  | 1.8   | -0.9 | 0.4  | 1.0 | -0.5 |
| XLOC_019631 | 159.4 | 81.3 | 79.7 | 168.9 | -0.9 | 0.0  | 1.0 | -0.1 |
| XLOC_023058 | 24.4  | 12.3 | 11.5 | 40.9  | -0.9 | 0.0  | 1.8 | -0.8 |
| XLOC_014573 | 6.9   | 3.4  | 3.4  | 8.8   | -1.0 | 0.1  | 1.3 | -0.4 |
| XLOC_022471 | 2.3   | 1.1  | 1.0  | 2.2   | -1.0 | 0.0  | 1.0 | 0.0  |
| XLOC_023228 | 3.0   | 1.4  | 1.8  | 3.6   | -1.0 | 0.4  | 0.9 | -0.3 |
| XLOC_019429 | 34.5  | 16.1 | 20.8 | 34.6  | -1.0 | 0.4  | 0.7 | -0.1 |
| XLOC_018068 | 9.5   | 4.4  | 4.4  | 8.9   | -1.1 | 0.1  | 0.9 | 0.1  |
| XLOC_023688 | 16.2  | 7.2  | 9.0  | 13.9  | -1.1 | 0.4  | 0.6 | 0.2  |
| XLOC_023010 | 1.6   | 0.7  | 0.7  | 1.5   | -1.1 | 0.1  | 1.0 | 0.0  |
| XLOC_014962 | 74.1  | 31.1 | 39.6 | 68.3  | -1.2 | 0.4  | 0.7 | 0.1  |
| XLOC_009531 | 12.2  | 5.0  | 6.6  | 11.2  | -1.2 | 0.5  | 0.7 | 0.1  |
| XLOC_015973 | 4.7   | 4.8  | 4.2  | 10.3  | 0.1  | -0.1 | 1.2 | -1.2 |
| XLOC_004810 | 1.7   | 1.8  | 1.3  | 2.9   | 0.1  | -0.3 | 1.1 | -0.8 |
| XLOC_008095 | 8.9   | 8.9  | 7.4  | 18.2  | 0.1  | -0.2 | 1.2 | -1.1 |
| XLOC_010200 | 6.8   | 6.6  | 5.8  | 25.0  | 0.0  | -0.1 | 2.0 | -1.9 |
| XLOC_011824 | 1.1   | 1.0  | 0.6  | 2.6   | 0.0  | -0.8 | 2.1 | -1.3 |
| XLOC_018664 | 4.2   | 4.0  | 2.5  | 7.1   | 0.0  | -0.6 | 1.4 | -0.8 |
| XLOC_022317 | 0.7   | 0.6  | 0.4  | 2.4   | 0.0  | -0.5 | 2.5 | -1.9 |
| XLOC_024758 | 13.4  | 12.1 | 9.6  | 29.1  | -0.1 | -0.3 | 1.5 | -1.2 |
| XLOC_000391 | 3.8   | 3.4  | 2.6  | 5.9   | -0.1 | -0.3 | 1.1 | -0.7 |
| XLOC_012452 | 1.4   | 1.3  | 0.7  | 3.0   | -0.1 | -0.8 | 2.0 | -1.1 |
| XLOC_022332 | 3.3   | 2.9  | 2.3  | 5.5   | -0.1 | -0.3 | 1.2 | -0.8 |
| XLOC_022734 | 6.2   | 5.4  | 4.1  | 10.0  | -0.1 | -0.3 | 1.2 | -0.7 |
| XLOC_020218 | 9.1   | 7.8  | 4.7  | 12.7  | -0.2 | -0.7 | 1.4 | -0.5 |
| XLOC_027981 | 4.0   | 3.4  | 2.4  | 5.4   | -0.2 | -0.4 | 1.1 | -0.5 |
| XLOC_026880 | 6.0   | 4.9  | 3.5  | 7.5   | -0.2 | -0.4 | 1.0 | -0.4 |
| XLOC_016207 | 5.2   | 4.2  | 3.5  | 8.4   | -0.3 | -0.2 | 1.2 | -0.8 |
| XLOC_027172 | 1.5   | 1.2  | 0.9  | 2.0   | -0.3 | -0.3 | 1.0 | -0.4 |
| XLOC_018818 | 3.4   | 2.7  | 2.2  | 5.1   | -0.3 | -0.2 | 1.1 | -0.6 |
| XLOC_010771 | 14.1  | 10.8 | 8.7  | 20.3  | -0.3 | -0.3 | 1.1 | -0.6 |
| XLOC_021925 | 3.1   | 2.3  | 1.9  | 3.9   | -0.3 | -0.3 | 1.0 | -0.4 |
| XLOC_014505 | 1.7   | 1.3  | 0.9  | 2.5   | -0.3 | -0.4 | 1.4 | -0.7 |
| XLOC_004121 | 7.2   | 5.3  | 4.4  | 10.4  | -0.4 | -0.2 | 1.2 | -0.6 |
| XLOC_022307 | 1.9   | 1.4  | 1.2  | 2.8   | -0.4 | -0.1 | 1.1 | -0.7 |
| XLOC_020419 | 7.4   | 5.4  | 3.6  | 9.6   | -0.4 | -0.5 | 1.4 | -0.4 |
| XLOC_006668 | 1.9   | 1.4  | 1.1  | 2.5   | -0.4 | -0.3 | 1.2 | -0.4 |
| XLOC_022436 | 1.7   | 1.2  | 1.0  | 2.9   | -0.4 | -0.2 | 1.4 | -0.8 |
| XLOC_013555 | 26.6  | 18.7 | 15.9 | 33.4  | -0.4 | -0.2 | 1.0 | -0.4 |
| XLOC_021741 | 1.0   | 0.7  | 0.6  | 2.1   | -0.4 | -0.3 | 1.8 | -1.0 |
| XLOC_023518 | 3.4   | 2.4  | 2.0  | 7.7   | -0.4 | -0.3 | 1.9 | -1.2 |
| XLOC_015773 | 3.0   | 2.1  | 1.9  | 4.4   | -0.5 | 0.0  | 1.1 | -0.6 |
| XLOC_015213 | 20.5  | 14.3 | 8.3  | 23.0  | -0.5 | -0.7 | 1.4 | -0.2 |

---

---

|             |      |      |      |       |      |      |     |      |
|-------------|------|------|------|-------|------|------|-----|------|
| XLOC_011548 | 8.4  | 5.9  | 5.8  | 12.9  | -0.5 | 0.0  | 1.1 | -0.7 |
| XLOC_007388 | 15.3 | 10.6 | 7.1  | 18.7  | -0.5 | -0.5 | 1.3 | -0.3 |
| XLOC_008507 | 17.4 | 12.0 | 11.8 | 26.0  | -0.5 | 0.0  | 1.1 | -0.6 |
| XLOC_008010 | 1.1  | 0.7  | 0.6  | 1.6   | -0.5 | -0.4 | 1.5 | -0.6 |
| XLOC_009800 | 2.7  | 1.8  | 2.0  | 4.7   | -0.5 | 0.2  | 1.1 | -0.9 |
| XLOC_011603 | 13.6 | 9.1  | 8.7  | 19.2  | -0.5 | 0.0  | 1.1 | -0.5 |
| XLOC_025091 | 4.4  | 2.9  | 2.0  | 5.5   | -0.5 | -0.5 | 1.4 | -0.4 |
| XLOC_000893 | 35.5 | 23.1 | 16.7 | 36.0  | -0.5 | -0.4 | 1.0 | -0.1 |
| XLOC_026184 | 1.4  | 0.9  | 1.0  | 2.4   | -0.6 | 0.2  | 1.2 | -0.8 |
| XLOC_020633 | 2.2  | 1.4  | 1.3  | 2.9   | -0.6 | -0.1 | 1.1 | -0.5 |
| XLOC_002952 | 1.8  | 1.2  | 0.9  | 2.9   | -0.6 | -0.3 | 1.6 | -0.7 |
| XLOC_002560 | 4.6  | 3.0  | 3.2  | 6.7   | -0.6 | 0.1  | 1.0 | -0.6 |
| XLOC_012682 | 3.9  | 2.5  | 1.8  | 4.0   | -0.6 | -0.5 | 1.1 | -0.1 |
| XLOC_012384 | 11.4 | 7.1  | 6.3  | 15.5  | -0.6 | -0.1 | 1.2 | -0.5 |
| XLOC_022037 | 4.7  | 2.9  | 2.4  | 5.1   | -0.6 | -0.2 | 1.0 | -0.1 |
| XLOC_027548 | 2.4  | 1.5  | 1.4  | 3.4   | -0.7 | 0.0  | 1.2 | -0.5 |
| XLOC_015012 | 1.3  | 0.8  | 0.5  | 2.2   | -0.7 | -0.4 | 2.0 | -0.9 |
| XLOC_023060 | 1.9  | 1.2  | 1.0  | 2.6   | -0.7 | -0.1 | 1.2 | -0.5 |
| XLOC_021146 | 1.5  | 0.9  | 0.6  | 1.6   | -0.7 | -0.6 | 1.4 | -0.1 |
| XLOC_027475 | 1.1  | 0.7  | 0.7  | 1.7   | -0.7 | 0.2  | 1.2 | -0.7 |
| XLOC_015276 | 2.8  | 1.7  | 0.9  | 3.8   | -0.7 | -0.9 | 2.1 | -0.5 |
| XLOC_018610 | 1.4  | 0.8  | 0.9  | 2.0   | -0.7 | 0.2  | 1.1 | -0.6 |
| XLOC_015849 | 15.7 | 9.0  | 8.8  | 20.1  | -0.7 | 0.0  | 1.1 | -0.4 |
| XLOC_009581 | 2.3  | 1.3  | 1.1  | 2.4   | -0.7 | -0.2 | 1.0 | -0.1 |
| XLOC_004078 | 1.1  | 0.6  | 0.9  | 2.0   | -0.7 | 0.6  | 1.1 | -0.9 |
| XLOC_022472 | 1.3  | 0.7  | 0.8  | 2.5   | -0.8 | 0.3  | 1.5 | -1.0 |
| XLOC_007965 | 3.2  | 1.8  | 1.5  | 4.8   | -0.8 | -0.2 | 1.6 | -0.7 |
| XLOC_004117 | 64.0 | 35.5 | 32.8 | 94.4  | -0.8 | -0.1 | 1.5 | -0.6 |
| XLOC_000564 | 13.7 | 7.3  | 8.2  | 18.0  | -0.8 | 0.2  | 1.1 | -0.5 |
| XLOC_001261 | 2.2  | 1.2  | 1.2  | 3.3   | -0.8 | 0.1  | 1.4 | -0.7 |
| XLOC_001297 | 77.9 | 41.4 | 39.9 | 119.7 | -0.8 | 0.0  | 1.5 | -0.7 |
| XLOC_005664 | 2.7  | 1.5  | 1.4  | 3.5   | -0.8 | 0.0  | 1.2 | -0.4 |
| XLOC_013807 | 1.6  | 0.9  | 0.7  | 2.5   | -0.8 | -0.2 | 1.8 | -0.7 |
| XLOC_014784 | 2.1  | 1.1  | 1.2  | 2.7   | -0.9 | 0.3  | 1.1 | -0.4 |
| XLOC_013123 | 1.4  | 0.7  | 0.8  | 1.9   | -0.9 | 0.2  | 1.3 | -0.5 |
| XLOC_026439 | 2.1  | 1.1  | 0.8  | 2.0   | -0.9 | -0.3 | 1.2 | 0.0  |
| XLOC_024729 | 10.7 | 5.1  | 5.0  | 15.0  | -1.0 | 0.0  | 1.5 | -0.5 |
| XLOC_023346 | 2.6  | 1.2  | 1.3  | 3.0   | -1.0 | 0.2  | 1.1 | -0.3 |
| XLOC_023467 | 1.7  | 0.8  | 0.6  | 1.5   | -1.1 | -0.4 | 1.4 | 0.1  |
| XLOC_001461 | 2.0  | 0.9  | 2.1  | 5.0   | -1.1 | 1.3  | 1.2 | -1.4 |
| XLOC_020613 | 60.0 | 24.3 | 49.6 | 124.6 | -1.2 | 1.1  | 1.3 | -1.1 |
| XLOC_000995 | 1.7  | 0.7  | 1.0  | 3.3   | -1.2 | 0.6  | 1.7 | -1.0 |
| XLOC_018004 | 1.4  | 0.6  | 0.5  | 1.8   | -1.2 | -0.3 | 1.9 | -0.4 |
| XLOC_015511 | 20.4 | 5.8  | 6.2  | 18.2  | -1.8 | 0.1  | 1.5 | 0.1  |

---

---

|             |      |      |      |       |      |      |     |      |
|-------------|------|------|------|-------|------|------|-----|------|
| XLOC_009999 | 3.3  | 1.5  | 2.6  | 4.1   | -1.0 | 0.8  | 0.6 | -0.4 |
| XLOC_019820 | 74.7 | 34.8 | 70.9 | 139.0 | -1.0 | 1.1  | 0.9 | -1.0 |
| XLOC_018592 | 9.5  | 3.6  | 5.1  | 9.2   | -1.3 | 0.5  | 0.8 | 0.0  |
| XLOC_023023 | 1.1  | 0.5  | 1.2  | 2.4   | -1.0 | 1.2  | 1.0 | -1.1 |
| XLOC_012590 | 1.3  | 0.4  | 1.5  | 2.6   | -1.5 | 1.8  | 0.7 | -1.1 |
| XLOC_010194 | 7.3  | 2.1  | 11.9 | 17.3  | -1.7 | 2.5  | 0.5 | -1.3 |
| XLOC_000470 | 5.1  | 2.6  | 7.0  | 11.1  | -0.9 | 1.5  | 0.6 | -1.2 |
| XLOC_011946 | 5.0  | 3.2  | 3.7  | 8.0   | -0.6 | 0.3  | 1.0 | -0.7 |
| XLOC_021045 | 39.4 | 24.6 | 25.9 | 60.4  | -0.6 | 0.1  | 1.2 | -0.7 |
| XLOC_017311 | 5.2  | 3.1  | 4.1  | 9.4   | -0.7 | 0.5  | 1.1 | -0.9 |
| XLOC_022202 | 19.3 | 11.4 | 15.0 | 33.1  | -0.7 | 0.4  | 1.1 | -0.8 |
| XLOC_024992 | 7.5  | 3.7  | 4.2  | 15.3  | -0.9 | 0.2  | 1.8 | -1.1 |
| XLOC_027617 | 11.5 | 5.7  | 6.7  | 21.9  | -0.9 | 0.3  | 1.7 | -1.0 |
| XLOC_005106 | 1.9  | 2.0  | 1.5  | 5.1   | 0.1  | -0.4 | 1.7 | -1.4 |
| XLOC_026678 | 1.3  | 1.3  | 1.2  | 2.5   | 0.1  | 0.0  | 1.0 | -1.0 |
| XLOC_012027 | 2.7  | 2.7  | 2.3  | 6.7   | 0.0  | -0.2 | 1.5 | -1.4 |
| XLOC_024990 | 4.3  | 3.9  | 3.6  | 12.1  | 0.0  | -0.1 | 1.7 | -1.6 |
| XLOC_025645 | 6.5  | 5.9  | 5.8  | 13.2  | -0.1 | 0.0  | 1.1 | -1.1 |
| XLOC_025006 | 6.1  | 5.6  | 4.7  | 12.2  | -0.1 | -0.2 | 1.3 | -1.0 |
| XLOC_007274 | 3.4  | 3.1  | 2.7  | 6.1   | -0.1 | -0.1 | 1.1 | -0.9 |
| XLOC_004326 | 1.7  | 1.5  | 1.3  | 3.7   | -0.2 | -0.1 | 1.4 | -1.2 |
| XLOC_018331 | 20.7 | 17.6 | 15.2 | 36.4  | -0.2 | -0.2 | 1.2 | -0.9 |
| XLOC_018617 | 7.2  | 6.0  | 6.4  | 14.4  | -0.2 | 0.2  | 1.1 | -1.1 |
| XLOC_002077 | 2.3  | 1.9  | 1.4  | 4.1   | -0.2 | -0.4 | 1.5 | -0.9 |
| XLOC_002019 | 27.6 | 22.9 | 20.9 | 46.5  | -0.2 | -0.1 | 1.1 | -0.8 |
| XLOC_008669 | 6.4  | 5.3  | 5.0  | 12.8  | -0.2 | 0.0  | 1.3 | -1.0 |
| XLOC_010233 | 4.8  | 3.9  | 4.1  | 9.7   | -0.2 | 0.1  | 1.2 | -1.1 |
| XLOC_020297 | 1.6  | 1.3  | 1.2  | 2.9   | -0.2 | 0.0  | 1.1 | -1.0 |
| XLOC_016927 | 4.6  | 3.6  | 3.2  | 8.0   | -0.3 | -0.1 | 1.3 | -0.9 |
| XLOC_022335 | 6.1  | 4.8  | 3.8  | 10.0  | -0.3 | -0.3 | 1.3 | -0.8 |
| XLOC_026360 | 1.4  | 1.1  | 1.2  | 2.5   | -0.3 | 0.1  | 1.0 | -0.9 |
| XLOC_005624 | 32.4 | 25.4 | 19.9 | 58.3  | -0.3 | -0.3 | 1.5 | -0.9 |
| XLOC_005408 | 20.1 | 15.5 | 15.3 | 35.5  | -0.3 | 0.0  | 1.1 | -0.9 |
| XLOC_000790 | 12.3 | 9.3  | 8.8  | 28.7  | -0.3 | 0.0  | 1.6 | -1.3 |
| XLOC_021713 | 4.4  | 3.3  | 3.1  | 8.0   | -0.3 | 0.0  | 1.3 | -0.9 |
| XLOC_005701 | 9.2  | 6.8  | 5.5  | 14.3  | -0.4 | -0.3 | 1.3 | -0.7 |
| XLOC_000469 | 36.2 | 26.2 | 25.8 | 57.6  | -0.4 | 0.0  | 1.1 | -0.7 |
| XLOC_004812 | 24.6 | 17.8 | 20.3 | 52.8  | -0.4 | 0.3  | 1.3 | -1.2 |
| XLOC_009827 | 45.8 | 32.4 | 33.5 | 70.6  | -0.4 | 0.1  | 1.0 | -0.7 |
| XLOC_025538 | 33.8 | 23.9 | 26.9 | 73.0  | -0.4 | 0.2  | 1.4 | -1.2 |
| XLOC_013824 | 3.6  | 2.5  | 2.1  | 6.1   | -0.4 | -0.2 | 1.4 | -0.8 |
| XLOC_002223 | 17.6 | 12.3 | 7.5  | 38.6  | -0.5 | -0.7 | 2.3 | -1.2 |
| XLOC_013207 | 4.9  | 3.4  | 3.6  | 12.9  | -0.5 | 0.2  | 1.8 | -1.5 |
| XLOC_026586 | 3.6  | 2.4  | 2.9  | 6.3   | -0.5 | 0.3  | 1.1 | -0.8 |

---

|             |            |       |       |        |      |      |      |      |
|-------------|------------|-------|-------|--------|------|------|------|------|
| XLOC_001953 | 2.5        | 1.6   | 1.8   | 4.3    | -0.6 | 0.2  | 1.2  | -0.9 |
| XLOC_014051 | 1.7        | 1.0   | 1.0   | 4.0    | -0.6 | 0.0  | 1.9  | -1.3 |
| XLOC_024991 | 5.6        | 3.5   | 4.5   | 11.2   | -0.6 | 0.4  | 1.2  | -1.0 |
| XLOC_016926 | 1.7        | 1.0   | 1.2   | 3.1    | -0.7 | 0.3  | 1.3  | -0.9 |
| XLOC_021058 | 1.5        | 0.8   | 1.0   | 2.5    | -0.8 | 0.3  | 1.3  | -0.8 |
| XLOC_020223 | 2.0        | 1.1   | 1.5   | 3.7    | -0.8 | 0.5  | 1.3  | -0.9 |
| XLOC_001087 | 1.5        | 0.6   | 0.8   | 3.4    | -1.2 | 0.4  | 2.1  | -1.2 |
| XLOC_024253 | 75.6       | 38.7  | 57.1  | 149.8  | -0.9 | 0.6  | 1.3  | -1.0 |
| XLOC_010156 | 146.2      | 72.6  | 147.3 | 268.5  | -0.9 | 1.1  | 0.8  | -0.9 |
| XLOC_017746 | 11.4       | 5.4   | 9.4   | 17.9   | -1.0 | 0.9  | 0.9  | -0.7 |
| XLOC_019600 | 109.3      | 107.1 | 50.1  | 295.2  | 0.0  | -1.0 | 2.5  | -1.5 |
| XLOC_022773 | 4.5        | 2.1   | 2.9   | 3.5    | -1.0 | 0.5  | 0.2  | 0.3  |
| XLOC_006698 | 35.4       | 16.9  | 22.6  | 31.7   | -1.0 | 0.5  | 0.4  | 0.1  |
| XLOC_010872 | 75.9       | 34.2  | 51.5  | 57.1   | -1.1 | 0.6  | 0.1  | 0.4  |
| XLOC_011912 | 1.4        | 0.6   | 0.9   | 1.4    | -1.1 | 0.5  | 0.7  | -0.1 |
| XLOC_006407 | 11.8       | 5.0   | 8.0   | 10.6   | -1.2 | 0.7  | 0.3  | 0.1  |
| XLOC_005805 | 3.5        | 1.4   | 2.2   | 3.2    | -1.2 | 0.7  | 0.5  | 0.0  |
| XLOC_026072 | 1.9        | 0.8   | 1.4   | 1.8    | -1.2 | 1.0  | 0.3  | 0.0  |
| XLOC_014411 | 11.4       | 4.6   | 7.0   | 9.4    | -1.2 | 0.7  | 0.3  | 0.2  |
| XLOC_017228 | 164.0      | 66.5  | 97.9  | 122.6  | -1.3 | 0.6  | 0.3  | 0.4  |
| XLOC_009683 | 3.3        | 1.3   | 2.1   | 3.0    | -1.3 | 0.8  | 0.5  | 0.1  |
| XLOC_003221 | 6.9        | 2.5   | 3.5   | 6.7    | -1.4 | 0.5  | 0.9  | 0.0  |
| XLOC_022367 | 108.4      | 39.0  | 57.4  | 87.5   | -1.4 | 0.6  | 0.5  | 0.3  |
| XLOC_025711 | 1.6        | 0.5   | 1.0   | 1.5    | -1.5 | 1.0  | 0.5  | 0.0  |
| XLOC_014575 | 8.6        | 2.0   | 4.1   | 5.4    | -2.0 | 1.1  | 0.3  | 0.6  |
| XLOC_006527 | 71.2       | 41.2  | 94.6  | 113.4  | -0.7 | 1.3  | 0.2  | -0.7 |
| XLOC_023252 | 13.6       | 6.8   | 13.2  | 18.9   | -0.9 | 1.0  | 0.5  | -0.5 |
| XLOC_008185 | 37.2       | 16.6  | 31.5  | 46.6   | -1.1 | 1.0  | 0.5  | -0.4 |
| XLOC_025635 | 28.0       | 12.3  | 18.9  | 25.1   | -1.1 | 0.7  | 0.3  | 0.1  |
| XLOC_011573 | 10.1       | 3.9   | 7.7   | 13.0   | -1.3 | 1.0  | 0.7  | -0.4 |
| XLOC_021619 | 11.8       | 4.4   | 11.6  | 11.0   | -1.4 | 1.5  | -0.2 | 0.0  |
| XLOC_006409 | 7.6        | 2.5   | 5.5   | 8.2    | -1.5 | 1.2  | 0.5  | -0.2 |
| XLOC_001406 | 18.9       | 4.3   | 22.6  | 14.2   | -2.1 | 2.4  | -0.7 | 0.4  |
| XLOC_013830 | 5.5        | 3.5   | 3.2   | 7.3    | -0.6 | 0.0  | 1.1  | -0.5 |
| XLOC_020184 | 3.1        | 1.7   | 1.6   | 4.0    | -0.8 | -0.1 | 1.3  | -0.5 |
| XLOC_002484 | 21.4       | 11.3  | 9.7   | 21.6   | -0.8 | -0.2 | 1.1  | -0.1 |
| XLOC_019584 | 1178.<br>5 | 617.9 | 637.3 | 1438.4 | -0.9 | 0.1  | 1.1  | -0.3 |
| XLOC_019172 | 8.8        | 4.5   | 4.3   | 10.3   | -0.9 | 0.0  | 1.2  | -0.3 |
| XLOC_002505 | 5.9        | 3.0   | 2.8   | 5.9    | -0.9 | -0.1 | 1.0  | -0.1 |
| XLOC_025880 | 3.7        | 1.9   | 1.4   | 3.8    | -0.9 | -0.4 | 1.4  | -0.1 |
| XLOC_003564 | 32.9       | 16.3  | 13.4  | 46.0   | -1.0 | -0.2 | 1.7  | -0.5 |
| XLOC_027582 | 2.8        | 1.3   | 2.0   | 3.6    | -1.0 | 0.6  | 0.8  | -0.4 |
| XLOC_004539 | 26.8       | 12.5  | 17.0  | 31.5   | -1.1 | 0.5  | 0.8  | -0.3 |



---

|             |       |       |       |       |      |      |     |      |
|-------------|-------|-------|-------|-------|------|------|-----|------|
| XLOC_013373 | 61.9  | 28.5  | 37.2  | 59.6  | -1.1 | 0.4  | 0.6 | 0.0  |
| XLOC_019354 | 20.1  | 9.1   | 13.4  | 21.2  | -1.1 | 0.6  | 0.6 | -0.1 |
| XLOC_026941 | 25.6  | 11.5  | 14.8  | 28.3  | -1.1 | 0.4  | 0.9 | -0.2 |
| XLOC_008848 | 73.0  | 33.2  | 39.5  | 82.9  | -1.1 | 0.3  | 1.0 | -0.2 |
| XLOC_020296 | 18.5  | 7.8   | 9.4   | 17.4  | -1.1 | 0.3  | 0.8 | 0.0  |
| XLOC_020207 | 19.4  | 8.3   | 8.5   | 17.4  | -1.2 | 0.1  | 1.0 | 0.1  |
| XLOC_001142 | 21.3  | 8.9   | 12.3  | 20.7  | -1.2 | 0.5  | 0.7 | 0.0  |
| XLOC_002541 | 9.5   | 3.7   | 4.8   | 8.2   | -1.3 | 0.4  | 0.7 | 0.2  |
| XLOC_001598 | 36.5  | 13.6  | 19.1  | 30.7  | -1.4 | 0.5  | 0.6 | 0.2  |
| XLOC_014978 | 145.0 | 52.7  | 68.6  | 135.6 | -1.4 | 0.4  | 0.9 | 0.1  |
| XLOC_021513 | 4.0   | 1.2   | 1.9   | 3.5   | -1.7 | 0.7  | 0.8 | 0.2  |
| XLOC_004827 | 11.3  | 3.0   | 5.6   | 10.7  | -1.8 | 1.0  | 0.9 | 0.0  |
| XLOC_001565 | 3.9   | 3.0   | 2.8   | 7.1   | -0.3 | -0.1 | 1.3 | -0.9 |
| XLOC_018987 | 14.0  | 10.2  | 8.6   | 19.8  | -0.4 | -0.2 | 1.1 | -0.6 |
| XLOC_008360 | 42.1  | 29.2  | 22.7  | 58.8  | -0.5 | -0.3 | 1.3 | -0.6 |
| XLOC_025690 | 4.2   | 2.9   | 2.0   | 5.0   | -0.5 | -0.5 | 1.2 | -0.3 |
| XLOC_021823 | 5.7   | 4.0   | 3.6   | 7.9   | -0.5 | -0.1 | 1.1 | -0.5 |
| XLOC_022995 | 7.9   | 5.4   | 6.3   | 14.6  | -0.5 | 0.3  | 1.1 | -0.9 |
| XLOC_017804 | 2.1   | 1.4   | 1.1   | 3.3   | -0.5 | -0.3 | 1.5 | -0.7 |
| XLOC_022312 | 12.0  | 7.9   | 4.9   | 12.6  | -0.5 | -0.6 | 1.3 | -0.1 |
| XLOC_024337 | 10.8  | 6.9   | 6.0   | 13.5  | -0.6 | -0.1 | 1.1 | -0.4 |
| XLOC_013909 | 5.6   | 3.0   | 3.5   | 7.9   | -0.8 | 0.3  | 1.1 | -0.6 |
| XLOC_005235 | 603.2 | 292.4 | 291.4 | 696.4 | -1.0 | 0.1  | 1.2 | -0.3 |
| XLOC_001189 | 2.8   | 1.4   | 1.1   | 3.2   | -1.0 | -0.3 | 1.5 | -0.2 |
| XLOC_007060 | 1.6   | 0.5   | 0.6   | 1.7   | -1.6 | 0.4  | 1.4 | -0.2 |
| XLOC_026438 | 11.4  | 5.0   | 7.6   | 15.7  | -1.1 | 0.7  | 1.0 | -0.5 |
| XLOC_003840 | 3.3   | 1.2   | 1.8   | 3.8   | -1.4 | 0.7  | 1.0 | -0.3 |
| XLOC_020166 | 3.6   | 1.3   | 2.2   | 4.3   | -1.4 | 0.8  | 0.9 | -0.3 |
| XLOC_019441 | 18.1  | 5.4   | 9.3   | 18.3  | -1.7 | 0.9  | 0.9 | -0.1 |
| XLOC_012528 | 1.4   | 1.1   | 0.3   | 2.1   | -0.2 | -1.6 | 2.5 | -0.7 |
| XLOC_014021 | 8.4   | 4.1   | 12.7  | 13.6  | -1.0 | 1.7  | 0.0 | -0.7 |
| XLOC_026933 | 21.1  | 12.9  | 14.1  | 34.6  | -0.7 | 0.2  | 1.2 | -0.8 |
| XLOC_015756 | 39.4  | 23.6  | 28.4  | 102.9 | -0.7 | 0.3  | 1.8 | -1.4 |
| XLOC_011838 | 10.5  | 5.8   | 6.6   | 17.2  | -0.8 | 0.2  | 1.3 | -0.8 |
| XLOC_025306 | 11.0  | 9.7   | 7.9   | 18.4  | -0.1 | -0.2 | 1.1 | -0.8 |
| XLOC_016458 | 17.4  | 13.6  | 13.2  | 30.1  | -0.3 | 0.0  | 1.1 | -0.9 |
| XLOC_027340 | 11.8  | 8.6   | 9.6   | 20.6  | -0.4 | 0.2  | 1.0 | -0.9 |
| XLOC_024199 | 16.2  | 11.1  | 10.6  | 25.1  | -0.5 | 0.0  | 1.2 | -0.7 |
| XLOC_008741 | 3.9   | 2.2   | 0.7   | 6.2   | -0.8 | -1.5 | 3.0 | -0.7 |
| XLOC_014180 | 5.2   | 2.8   | 0.5   | 9.2   | -0.9 | -2.4 | 4.2 | -0.9 |
| XLOC_007360 | 15.3  | 7.9   | 17.7  | 30.3  | -0.9 | 1.2  | 0.7 | -1.0 |
| XLOC_015389 | 1.4   | 0.6   | 1.4   | 2.8   | -1.1 | 1.2  | 0.9 | -1.0 |
| XLOC_006976 | 6.6   | 2.2   | 6.1   | 11.7  | -1.6 | 1.6  | 0.9 | -0.9 |
| XLOC_008542 | 24.5  | 18.4  | 10.7  | 67.3  | -0.4 | -0.7 | 2.6 | -1.5 |

---

|             |            |        |        |        |      |      |      |      |
|-------------|------------|--------|--------|--------|------|------|------|------|
| XLOC_002264 | 0.6        | 5.6    | 5.5    | 2.2    | 3.4  | 0.0  | -1.4 | -2.0 |
| XLOC_016862 | 1.8        | 3.8    | 3.4    | 3.3    | 1.2  | -0.1 | -0.1 | -1.0 |
| XLOC_019017 | 6.0        | 13.1   | 12.5   | 10.0   | 1.2  | 0.0  | -0.4 | -0.8 |
| XLOC_001217 | 124.7      | 257.6  | 292.8  | 223.4  | 1.1  | 0.2  | -0.5 | -0.9 |
| XLOC_022429 | 34.0       | 67.8   | 85.8   | 50.3   | 1.1  | 0.4  | -0.8 | -0.6 |
| XLOC_016196 | 0.1        | 0.4    | 3.9    | 0.3    | 1.8  | 3.2  | -3.9 | -1.2 |
| XLOC_001273 | 32.5       | 36.1   | 97.5   | 62.2   | 0.2  | 1.5  | -0.7 | -1.0 |
| XLOC_020038 | 5.4        | 5.8    | 11.5   | 8.7    | 0.1  | 1.1  | -0.5 | -0.7 |
| XLOC_000731 | 5.9        | 5.7    | 16.9   | 12.1   | 0.0  | 1.6  | -0.6 | -1.1 |
| XLOC_001051 | 2435.<br>7 | 2178.4 | 4753.7 | 3098.7 | -0.1 | 1.2  | -0.7 | -0.4 |
| XLOC_010785 | 2.5        | 2.2    | 5.4    | 3.3    | -0.1 | 1.4  | -0.8 | -0.5 |
| XLOC_023866 | 3.5        | 2.8    | 5.8    | 5.2    | -0.2 | 1.1  | -0.2 | -0.6 |
| XLOC_004561 | 6.0        | 4.9    | 10.2   | 10.3   | -0.2 | 1.1  | -0.1 | -0.8 |
| XLOC_001672 | 2.3        | 1.9    | 6.9    | 4.5    | -0.2 | 1.9  | -0.7 | -1.0 |
| XLOC_009920 | 0.7        | 0.6    | 4.0    | 3.5    | -0.3 | 2.8  | -0.2 | -2.3 |
| XLOC_001339 | 1.8        | 1.4    | 5.5    | 4.2    | -0.3 | 2.0  | -0.5 | -1.2 |
| XLOC_008464 | 2.3        | 1.8    | 4.1    | 3.9    | -0.3 | 1.3  | -0.1 | -0.8 |
| XLOC_009763 | 1.5        | 1.2    | 4.3    | 3.4    | -0.3 | 1.9  | -0.4 | -1.2 |
| XLOC_020156 | 584.6      | 438.0  | 1013.0 | 731.6  | -0.4 | 1.3  | -0.5 | -0.4 |
| XLOC_024251 | 2.1        | 1.5    | 3.8    | 3.0    | -0.4 | 1.4  | -0.4 | -0.6 |
| XLOC_008346 | 27.6       | 18.5   | 37.6   | 37.2   | -0.5 | 1.1  | -0.1 | -0.5 |
| XLOC_005378 | 3.7        | 2.4    | 6.4    | 6.6    | -0.6 | 1.5  | 0.0  | -0.9 |
| XLOC_014826 | 1.6        | 1.0    | 3.6    | 2.4    | -0.6 | 1.9  | -0.6 | -0.7 |
| XLOC_001416 | 9.9        | 6.2    | 14.6   | 13.8   | -0.6 | 1.3  | -0.1 | -0.5 |
| XLOC_018594 | 8.8        | 5.3    | 13.6   | 12.6   | -0.7 | 1.4  | -0.2 | -0.6 |
| XLOC_009771 | 5.3        | 3.1    | 7.7    | 6.8    | -0.7 | 1.4  | -0.2 | -0.4 |
| XLOC_002439 | 10.0       | 4.9    | 69.1   | 20.7   | -0.9 | 3.9  | -1.8 | -1.1 |
| XLOC_012110 | 5.4        | 12.6   | 12.8   | 7.2    | 1.3  | 0.1  | -0.9 | -0.5 |
| XLOC_007534 | 1.7        | 3.8    | 4.2    | 2.4    | 1.2  | 0.2  | -0.9 | -0.6 |
| XLOC_026272 | 217.5      | 470.4  | 460.6  | 299.8  | 1.2  | 0.0  | -0.7 | -0.5 |
| XLOC_013491 | 2.9        | 6.0    | 5.9    | 3.4    | 1.1  | 0.0  | -0.9 | -0.3 |
| XLOC_013468 | 72.6       | 145.7  | 172.8  | 94.7   | 1.1  | 0.3  | -0.9 | -0.4 |
| XLOC_022723 | 18.6       | 37.0   | 35.3   | 26.1   | 1.1  | 0.0  | -0.5 | -0.6 |
| XLOC_017794 | 11.9       | 22.9   | 25.1   | 14.8   | 1.0  | 0.2  | -0.8 | -0.4 |
| XLOC_012944 | 56.2       | 107.4  | 136.8  | 58.5   | 1.0  | 0.4  | -1.3 | -0.1 |
| XLOC_018924 | 40.1       | 76.8   | 102.6  | 51.9   | 1.0  | 0.5  | -1.1 | -0.4 |
| XLOC_011855 | 2.4        | 4.4    | 6.7    | 3.1    | 1.0  | 0.7  | -1.2 | -0.5 |
| XLOC_021390 | 42.4       | 75.2   | 95.7   | 46.1   | 0.9  | 0.4  | -1.1 | -0.2 |
| XLOC_015553 | 1.4        | 2.4    | 3.1    | 1.4    | 0.9  | 0.4  | -1.2 | -0.1 |
| XLOC_000949 | 282.1      | 470.1  | 618.2  | 301.1  | 0.8  | 0.4  | -1.1 | -0.2 |
| XLOC_014091 | 10.2       | 16.8   | 22.8   | 11.9   | 0.8  | 0.5  | -1.0 | -0.3 |
| XLOC_018347 | 42.9       | 69.2   | 90.1   | 43.9   | 0.8  | 0.4  | -1.1 | -0.1 |
| XLOC_012221 | 1101.      | 3884.7 | 6368.8 | 1257.3 | 1.9  | 0.8  | -2.4 | -0.3 |

---

|             |            |        |         |        |      |      |      |      |
|-------------|------------|--------|---------|--------|------|------|------|------|
|             | 6          |        |         |        |      |      |      |      |
| XLOC_012209 | 1617.<br>9 | 4947.4 | 16380.3 | 2984.2 | 1.7  | 1.8  | -2.5 | -1.0 |
| XLOC_023915 | 0.5        | 1.4    | 3.2     | 1.0    | 1.6  | 1.3  | -1.8 | -1.0 |
| XLOC_012476 | 0.6        | 1.6    | 2.4     | 0.7    | 1.5  | 0.7  | -1.8 | -0.3 |
| XLOC_014266 | 12.2       | 31.7   | 40.6    | 16.2   | 1.5  | 0.4  | -1.4 | -0.5 |
| XLOC_008987 | 0.7        | 1.6    | 2.1     | 0.7    | 1.3  | 0.5  | -1.6 | -0.1 |
| XLOC_009393 | 1.0        | 2.0    | 2.6     | 1.2    | 1.1  | 0.4  | -1.2 | -0.3 |
| XLOC_021240 | 1.3        | 2.7    | 4.5     | 1.4    | 1.1  | 0.8  | -1.7 | -0.1 |
| XLOC_021789 | 28.2       | 53.0   | 68.7    | 33.9   | 1.0  | 0.4  | -1.1 | -0.3 |
| XLOC_005974 | 6.5        | 12.1   | 14.6    | 7.4    | 1.0  | 0.3  | -1.0 | -0.2 |
| XLOC_021241 | 3.5        | 6.6    | 16.7    | 5.0    | 0.9  | 1.4  | -1.8 | -0.5 |
| XLOC_021235 | 0.9        | 1.6    | 2.9     | 1.3    | 0.9  | 0.9  | -1.2 | -0.6 |
| XLOC_025562 | 11.9       | 20.8   | 28.9    | 11.8   | 0.9  | 0.5  | -1.4 | 0.0  |
| XLOC_007530 | 2.3        | 3.8    | 5.7     | 2.9    | 0.8  | 0.6  | -1.0 | -0.4 |
| XLOC_026999 | 2.9        | 4.7    | 5.8     | 3.0    | 0.8  | 0.4  | -1.0 | -0.1 |
| XLOC_025516 | 361.1      | 578.6  | 775.4   | 361.3  | 0.8  | 0.5  | -1.2 | -0.1 |
| XLOC_010928 | 37.1       | 60.3   | 80.9    | 42.0   | 0.7  | 0.5  | -1.0 | -0.2 |
| XLOC_018069 | 1.2        | 1.4    | 3.0     | 1.2    | 0.3  | 1.1  | -1.4 | -0.1 |
| XLOC_018844 | 21.4       | 39.0   | 90.4    | 25.5   | 0.9  | 1.3  | -1.9 | -0.3 |
| XLOC_006129 | 9.7        | 15.3   | 21.0    | 9.1    | 0.7  | 0.5  | -1.3 | 0.0  |
| XLOC_026558 | 0.4        | 0.7    | 3.4     | 0.4    | 0.8  | 2.4  | -3.3 | 0.1  |
| XLOC_021265 | 0.1        | 0.1    | 4.2     | 0.1    | 0.8  | 5.5  | -5.4 | -0.9 |
| XLOC_017342 | 48.4       | 77.8   | 164.2   | 82.6   | 0.8  | 1.1  | -1.1 | -0.8 |
| XLOC_010541 | 9.3        | 13.0   | 21.5    | 10.4   | 0.6  | 0.8  | -1.1 | -0.2 |
| XLOC_024089 | 473.2      | 610.0  | 1433.1  | 743.1  | 0.4  | 1.3  | -1.0 | -0.7 |
| XLOC_027389 | 8.6        | 10.8   | 26.7    | 12.2   | 0.4  | 1.4  | -1.2 | -0.6 |
| XLOC_001633 | 77.1       | 84.3   | 212.9   | 73.4   | 0.2  | 1.4  | -1.6 | 0.0  |
| XLOC_001608 | 406.2      | 351.0  | 751.7   | 348.3  | -0.2 | 1.2  | -1.2 | 0.2  |
| XLOC_024611 | 2.3        | 2.0    | 13.5    | 4.3    | -0.2 | 2.8  | -1.7 | -1.0 |
| XLOC_022194 | 1.6        | 1.4    | 3.2     | 1.6    | -0.2 | 1.3  | -1.1 | 0.0  |
| XLOC_006971 | 10.5       | 8.6    | 30.4    | 13.0   | -0.2 | 1.9  | -1.3 | -0.3 |
| XLOC_000630 | 10.5       | 7.6    | 22.8    | 8.8    | -0.4 | 1.6  | -1.4 | 0.2  |
| XLOC_009842 | 8.7        | 6.1    | 12.3    | 8.7    | -0.5 | 1.1  | -0.6 | 0.0  |
| XLOC_016522 | 3.0        | 2.0    | 4.4     | 3.1    | -0.5 | 1.3  | -0.6 | -0.1 |
| XLOC_021073 | 5.0        | 3.3    | 9.0     | 4.9    | -0.6 | 1.5  | -1.0 | 0.0  |
| XLOC_024266 | 10.2       | 6.1    | 16.6    | 9.6    | -0.7 | 1.5  | -0.9 | 0.1  |
| XLOC_016636 | 0.5        | 6.6    | 8.2     | 12.7   | 3.8  | 0.4  | 0.6  | -4.7 |
| XLOC_010141 | 0.5        | 2.2    | 5.9     | 2.9    | 2.4  | 1.4  | -1.1 | -2.7 |
| XLOC_008893 | 4.8        | 14.4   | 11.3    | 9.8    | 1.6  | -0.3 | -0.3 | -1.1 |
| XLOC_004881 | 191.3      | 516.5  | 527.7   | 469.7  | 1.5  | 0.1  | -0.2 | -1.4 |
| XLOC_009807 | 1.3        | 3.2    | 2.7     | 2.6    | 1.5  | -0.2 | -0.1 | -1.2 |
| XLOC_004809 | 2.6        | 6.1    | 5.8     | 9.1    | 1.3  | 0.0  | 0.6  | -1.9 |
| XLOC_023844 | 3.5        | 7.8    | 9.0     | 7.6    | 1.3  | 0.3  | -0.3 | -1.2 |

---

---

|             |       |       |        |        |        |      |      |      |
|-------------|-------|-------|--------|--------|--------|------|------|------|
| XLOC_000440 | 4.6   | 10.1  | 13.8   | 23.0   | 1.2    | 0.5  | 0.7  | -2.4 |
| XLOC_024915 | 94.3  | 187.4 | 183.1  | 176.0  | 1.0    | 0.0  | -0.1 | -0.9 |
| XLOC_010264 | 18.5  | 35.5  | 40.1   | 38.2   | 1.0    | 0.2  | -0.1 | -1.1 |
| XLOC_026886 | 15.9  | 28.0  | 27.2   | 30.6   | 0.9    | 0.0  | 0.1  | -1.0 |
| XLOC_011999 | 4.5   | 7.5   | 10.3   | 10.3   | 0.8    | 0.5  | -0.1 | -1.2 |
| XLOC_007886 | 19.7  | 30.2  | 35.0   | 38.2   | 0.7    | 0.3  | 0.1  | -1.0 |
| XLOC_001137 | 1.1   | 3.7   | 48.9   | 34.7   | 1.8    | 3.8  | -0.6 | -5.0 |
| XLOC_005403 | 1.7   | 5.3   | 6.9    | 9.3    | 1.7    | 0.4  | 0.4  | -2.5 |
| XLOC_020369 | 50.7  | 150.7 | 253.9  | 369.4  | 1.7    | 0.8  | 0.5  | -2.9 |
| XLOC_027952 | 7.7   | 21.4  | 43.5   | 26.6   | 1.5    | 1.1  | -0.8 | -1.9 |
| XLOC_010649 | 6.7   | 14.7  | 16.4   | 20.3   | 1.2    | 0.2  | 0.2  | -1.7 |
| XLOC_000388 | 9.7   | 18.4  | 15.7   | 20.4   | 1.0    | -0.2 | 0.3  | -1.1 |
| XLOC_023806 | 4.1   | 7.5   | 12.8   | 12.7   | 0.9    | 0.8  | -0.1 | -1.7 |
| XLOC_007214 | 8.6   | 13.5  | 14.9   | 20.5   | 0.7    | 0.2  | 0.4  | -1.3 |
| XLOC_016957 | 7.9   | 11.6  | 19.7   | 15.3   | 0.6    | 0.8  | -0.4 | -1.0 |
| XLOC_005867 | 5.3   | 7.8   | 8.9    | 11.4   | 0.6    | 0.2  | 0.3  | -1.1 |
| XLOC_010135 | 76.8  | 102.7 | 135.3  | 157.2  | 0.5    | 0.5  | 0.1  | -1.1 |
| XLOC_018196 | 2.2   | 2.7   | 4.7    | 4.6    | 0.3    | 0.9  | -0.1 | -1.1 |
| XLOC_001918 | 0.5   | 0.0   | 3.3    | 3.7    | #NAME? | inf  | 0.1  | -2.9 |
| XLOC_020372 | 38.5  | 94.7  | 180.5  | 227.2  | 1.4    | 1.0  | 0.3  | -2.6 |
| XLOC_008544 | 2.9   | 6.9   | 14.2   | 12.0   | 1.3    | 1.1  | -0.3 | -2.1 |
| XLOC_008744 | 6.5   | 10.7  | 19.2   | 20.0   | 0.8    | 0.9  | 0.0  | -1.7 |
| XLOC_022420 | 7.0   | 11.3  | 18.6   | 18.7   | 0.7    | 0.8  | -0.1 | -1.5 |
| XLOC_016978 | 0.6   | 0.9   | 2.4    | 1.8    | 0.6    | 1.4  | -0.5 | -1.6 |
| XLOC_024662 | 27.7  | 36.1  | 53.4   | 62.5   | 0.4    | 0.6  | 0.2  | -1.2 |
| XLOC_022404 | 11.5  | 15.1  | 22.2   | 24.3   | 0.4    | 0.6  | 0.1  | -1.1 |
| XLOC_010819 | 2.6   | 2.8   | 12.0   | 7.8    | 0.1    | 2.2  | -0.7 | -1.6 |
| XLOC_014156 | 6.1   | 6.0   | 33.5   | 20.0   | 0.0    | 2.5  | -0.8 | -1.8 |
| XLOC_008723 | 7.0   | 6.6   | 22.6   | 18.7   | 0.0    | 1.8  | -0.3 | -1.5 |
| XLOC_007254 | 11.8  | 7.7   | 22.7   | 22.4   | -0.5   | 1.6  | -0.1 | -1.0 |
| XLOC_004247 | 10.6  | 32.5  | 42.0   | 86.8   | 1.7    | 0.4  | 1.0  | -3.1 |
| XLOC_010854 | 6.5   | 16.9  | 21.1   | 11.5   | 1.4    | 0.4  | -1.0 | -0.9 |
| XLOC_012021 | 4.0   | 10.1  | 11.2   | 7.5    | 1.4    | 0.2  | -0.6 | -1.0 |
| XLOC_021924 | 2.1   | 4.4   | 6.4    | 3.8    | 1.2    | 0.6  | -0.8 | -0.9 |
| XLOC_020373 | 87.8  | 201.3 | 307.5  | 536.1  | 1.3    | 0.7  | 0.7  | -2.7 |
| XLOC_002040 | 2.0   | 4.3   | 6.5    | 3.4    | 1.2    | 0.6  | -1.0 | -0.8 |
| XLOC_017329 | 27.5  | 52.7  | 71.6   | 40.5   | 1.0    | 0.5  | -0.9 | -0.6 |
| XLOC_005765 | 0.4   | 0.8   | 7.9    | 1.8    | 1.2    | 3.3  | -2.2 | -2.4 |
| XLOC_008938 | 1.1   | 2.0   | 5.4    | 2.6    | 1.0    | 1.5  | -1.1 | -1.3 |
| XLOC_001914 | 19.5  | 23.5  | 447.2  | 91.8   | 0.4    | 4.3  | -2.4 | -2.3 |
| XLOC_013997 | 12.6  | 12.8  | 31.8   | 23.0   | 0.1    | 1.4  | -0.5 | -0.9 |
| XLOC_022574 | 134.1 | 129.2 | 5258.9 | 2702.4 | 0.0    | 5.4  | -1.0 | -4.4 |
| XLOC_001854 | 6.4   | 4.8   | 44.5   | 27.5   | -0.3   | 3.3  | -0.8 | -2.2 |
| XLOC_001388 | 0.8   | 19.1  | 0.1    | 2.2    | 4.6    | -7.9 | 4.7  | -1.5 |

---

---

|             |       |       |       |       |      |      |      |      |
|-------------|-------|-------|-------|-------|------|------|------|------|
| XLOC_009928 | 1.1   | 4.2   | 2.0   | 1.3   | 2.0  | -1.0 | -0.7 | -0.3 |
| XLOC_013703 | 2.6   | 8.1   | 4.9   | 2.9   | 1.7  | -0.7 | -0.8 | -0.2 |
| XLOC_016985 | 1.4   | 3.9   | 1.4   | 0.3   | 1.6  | -1.4 | -2.1 | 2.0  |
| XLOC_005950 | 14.2  | 40.0  | 2.1   | 15.5  | 1.5  | -4.2 | 2.8  | -0.2 |
| XLOC_010390 | 2.7   | 7.6   | 5.3   | 3.4   | 1.5  | -0.4 | -0.7 | -0.4 |
| XLOC_017487 | 0.7   | 1.9   | 1.2   | 0.7   | 1.5  | -0.6 | -0.8 | -0.1 |
| XLOC_004972 | 54.4  | 141.3 | 108.2 | 88.0  | 1.4  | -0.3 | -0.4 | -0.7 |
| XLOC_022501 | 7.2   | 16.5  | 14.9  | 9.1   | 1.2  | -0.1 | -0.8 | -0.4 |
| XLOC_026731 | 5.7   | 13.0  | 7.5   | 6.4   | 1.2  | -0.7 | -0.3 | -0.2 |
| XLOC_025454 | 152.6 | 306.6 | 217.5 | 230.0 | 1.1  | -0.4 | 0.0  | -0.6 |
| XLOC_003253 | 3.7   | 7.2   | 6.0   | 4.3   | 1.0  | -0.2 | -0.5 | -0.3 |
| XLOC_025082 | 6.7   | 13.9  | 9.4   | 7.8   | 1.0  | -0.5 | -0.4 | -0.2 |
| XLOC_021304 | 1.0   | 13.4  | 0.9   | 0.9   | 3.8  | -3.8 | -0.2 | 0.1  |
| XLOC_026855 | 1.9   | 20.8  | 1.4   | 1.2   | 3.5  | -3.8 | -0.3 | 0.6  |
| XLOC_019590 | 26.5  | 194.4 | 26.2  | 40.2  | 2.9  | -2.8 | 0.6  | -0.7 |
| XLOC_013593 | 0.6   | 2.5   | 0.9   | 0.4   | 2.2  | -1.4 | -1.3 | 0.4  |
| XLOC_021305 | 163.7 | 628.3 | 343.5 | 250.5 | 2.0  | -0.8 | -0.5 | -0.7 |
| XLOC_005518 | 2.0   | 7.0   | 2.6   | 1.6   | 1.9  | -1.4 | -0.8 | 0.2  |
| XLOC_022018 | 1.7   | 5.9   | 1.3   | 0.7   | 1.8  | -2.1 | -0.9 | 1.1  |
| XLOC_004050 | 4.7   | 14.6  | 5.6   | 3.6   | 1.7  | -1.3 | -0.7 | 0.3  |
| XLOC_015863 | 2.7   | 7.1   | 4.0   | 3.3   | 1.5  | -0.8 | -0.3 | -0.4 |
| XLOC_004248 | 7.4   | 15.3  | 7.2   | 4.8   | 1.1  | -1.0 | -0.7 | 0.6  |
| XLOC_010971 | 474.5 | 956.4 | 432.4 | 342.1 | 1.1  | -1.1 | -0.4 | 0.4  |
| XLOC_016443 | 11.5  | 21.4  | 5.0   | 4.8   | 1.0  | -2.0 | -0.1 | 1.2  |
| XLOC_015829 | 4.8   | 8.0   | 3.5   | 4.7   | 0.8  | -1.2 | 0.4  | 0.0  |
| XLOC_009710 | 17.0  | 24.6  | 11.5  | 15.1  | 0.6  | -1.0 | 0.3  | 0.1  |
| XLOC_017681 | 7.1   | 10.0  | 4.7   | 5.4   | 0.6  | -1.0 | 0.1  | 0.3  |
| XLOC_002388 | 4.0   | 29.8  | 5.0   | 1.5   | 2.9  | -2.5 | -1.8 | 1.3  |
| XLOC_016959 | 1.7   | 2.9   | 0.2   | 0.8   | 0.9  | -3.6 | 1.6  | 1.0  |
| XLOC_021801 | 2.6   | 4.2   | 1.5   | 1.4   | 0.8  | -1.4 | -0.2 | 0.9  |
| XLOC_026882 | 1.5   | 2.2   | 0.7   | 1.5   | 0.6  | -1.7 | 1.0  | 0.0  |
| XLOC_026228 | 197.9 | 277.5 | 119.3 | 120.5 | 0.5  | -1.2 | -0.1 | 0.7  |
| XLOC_026172 | 8.1   | 11.4  | 4.5   | 5.1   | 0.5  | -1.3 | 0.1  | 0.6  |
| XLOC_024063 | 27.5  | 57.5  | 28.7  | 15.8  | 1.1  | -0.9 | -0.9 | 0.7  |
| XLOC_010972 | 17.5  | 32.9  | 7.3   | 14.9  | 1.0  | -2.1 | 1.0  | 0.2  |
| XLOC_018503 | 2.1   | 4.0   | 1.3   | 3.5   | 1.0  | -1.5 | 1.3  | -0.8 |
| XLOC_013749 | 2.7   | 4.5   | 0.9   | 2.1   | 0.8  | -2.2 | 1.1  | 0.3  |
| XLOC_010718 | 1.8   | 2.6   | 1.5   | 0.6   | 0.6  | -0.7 | -1.4 | 1.5  |
| XLOC_019872 | 2.0   | 2.3   | 1.6   | 0.7   | 0.5  | -0.5 | -1.4 | 1.4  |
| XLOC_012012 | 6.4   | 7.1   | 5.9   | 3.0   | 0.2  | -0.2 | -1.0 | 1.0  |
| XLOC_006917 | 1.4   | 1.1   | 1.4   | 0.6   | -0.3 | 0.4  | -1.4 | 1.3  |
| XLOC_002431 | 3.7   | 2.9   | 3.3   | 1.6   | -0.3 | 0.3  | -1.1 | 1.2  |
| XLOC_009210 | 5.4   | 7.8   | 2.5   | 2.1   | 0.6  | -1.6 | -0.3 | 1.3  |
| XLOC_009926 | 2.1   | 2.6   | 0.9   | 1.0   | 0.4  | -1.5 | 0.1  | 1.0  |

---

---

|             |       |      |      |      |        |      |      |     |
|-------------|-------|------|------|------|--------|------|------|-----|
| XLOC_012095 | 2.5   | 9.2  | 5.5  | 0.6  | 1.9    | -0.7 | -3.2 | 2.0 |
| XLOC_023221 | 2.8   | 8.1  | 6.1  | 2.7  | 1.6    | -0.4 | -1.3 | 0.1 |
| XLOC_003234 | 1.3   | 2.7  | 1.8  | 0.9  | 1.2    | -0.6 | -1.0 | 0.4 |
| XLOC_000765 | 4.7   | 9.9  | 8.2  | 4.7  | 1.1    | -0.2 | -0.9 | 0.0 |
| XLOC_021154 | 2.6   | 0.0  | 0.0  | 1.4  | #NAME? | 0.0  | inf  | 0.8 |
| XLOC_022256 | 3.8   | 1.8  | 1.6  | 2.6  | -1.0   | -0.1 | 0.6  | 0.5 |
| XLOC_011542 | 15.8  | 7.6  | 9.2  | 12.0 | -1.0   | 0.3  | 0.3  | 0.3 |
| XLOC_013364 | 148.0 | 70.3 | 49.5 | 72.4 | -1.0   | -0.4 | 0.5  | 1.0 |
| XLOC_011227 | 2.3   | 1.1  | 1.5  | 1.6  | -1.0   | 0.5  | 0.0  | 0.5 |
| XLOC_001335 | 22.5  | 10.7 | 12.1 | 20.0 | -1.0   | 0.2  | 0.7  | 0.1 |
| XLOC_020322 | 2.3   | 1.1  | 1.2  | 1.9  | -1.0   | 0.2  | 0.5  | 0.2 |
| XLOC_006795 | 2.4   | 1.1  | 1.4  | 1.2  | -1.0   | 0.4  | -0.3 | 0.9 |
| XLOC_027370 | 1.9   | 0.9  | 0.9  | 1.2  | -1.0   | 0.0  | 0.3  | 0.7 |
| XLOC_023809 | 19.0  | 8.9  | 9.2  | 13.6 | -1.0   | 0.1  | 0.5  | 0.4 |
| XLOC_005952 | 3.9   | 1.8  | 1.4  | 2.5  | -1.0   | -0.3 | 0.7  | 0.6 |
| XLOC_021856 | 4.8   | 2.2  | 2.7  | 3.4  | -1.0   | 0.3  | 0.3  | 0.4 |
| XLOC_011668 | 5.8   | 2.7  | 2.5  | 4.2  | -1.0   | 0.0  | 0.7  | 0.4 |
| XLOC_018807 | 5.8   | 2.7  | 2.8  | 4.3  | -1.1   | 0.1  | 0.6  | 0.4 |
| XLOC_006901 | 12.2  | 5.4  | 7.0  | 8.7  | -1.1   | 0.4  | 0.2  | 0.4 |
| XLOC_020880 | 12.7  | 5.7  | 4.8  | 8.5  | -1.1   | -0.2 | 0.8  | 0.5 |
| XLOC_003567 | 4.5   | 1.9  | 1.4  | 1.9  | -1.1   | -0.4 | 0.3  | 1.2 |
| XLOC_015959 | 45.7  | 20.1 | 24.7 | 22.8 | -1.1   | 0.4  | -0.2 | 1.0 |
| XLOC_005870 | 3.4   | 1.5  | 1.5  | 2.4  | -1.1   | 0.0  | 0.7  | 0.4 |
| XLOC_027428 | 4.9   | 2.1  | 2.5  | 3.5  | -1.1   | 0.3  | 0.4  | 0.4 |
| XLOC_027844 | 2.4   | 1.0  | 1.2  | 1.9  | -1.1   | 0.3  | 0.6  | 0.3 |
| XLOC_012906 | 70.2  | 30.4 | 32.6 | 47.5 | -1.1   | 0.2  | 0.5  | 0.5 |
| XLOC_005241 | 8.6   | 3.7  | 1.6  | 3.6  | -1.2   | -1.1 | 1.1  | 1.2 |
| XLOC_018153 | 10.8  | 4.5  | 6.1  | 8.6  | -1.2   | 0.5  | 0.4  | 0.3 |
| XLOC_025446 | 2.4   | 1.0  | 1.1  | 1.4  | -1.2   | 0.2  | 0.3  | 0.7 |
| XLOC_006333 | 3.8   | 1.6  | 1.5  | 2.3  | -1.2   | 0.0  | 0.5  | 0.7 |
| XLOC_023107 | 2.8   | 1.1  | 1.3  | 1.8  | -1.2   | 0.2  | 0.5  | 0.5 |
| XLOC_019272 | 2.8   | 1.2  | 1.6  | 2.1  | -1.2   | 0.5  | 0.3  | 0.4 |
| XLOC_005445 | 2.0   | 0.8  | 1.0  | 1.3  | -1.2   | 0.3  | 0.4  | 0.6 |
| XLOC_013991 | 6.3   | 2.6  | 2.9  | 4.1  | -1.2   | 0.2  | 0.4  | 0.6 |
| XLOC_019869 | 5.1   | 2.0  | 2.4  | 3.2  | -1.3   | 0.3  | 0.3  | 0.6 |
| XLOC_024053 | 3.0   | 1.2  | 0.8  | 2.0  | -1.3   | -0.5 | 1.2  | 0.5 |
| XLOC_020531 | 4.2   | 1.6  | 1.4  | 2.3  | -1.3   | -0.2 | 0.6  | 0.9 |
| XLOC_013119 | 2.0   | 0.8  | 0.7  | 1.6  | -1.3   | -0.1 | 1.1  | 0.3 |
| XLOC_011264 | 2.4   | 0.9  | 1.0  | 2.0  | -1.4   | 0.3  | 0.9  | 0.2 |
| XLOC_010623 | 2.6   | 0.9  | 1.1  | 1.8  | -1.4   | 0.2  | 0.7  | 0.5 |
| XLOC_009102 | 1.6   | 0.6  | 0.7  | 1.2  | -1.5   | 0.3  | 0.8  | 0.4 |
| XLOC_002204 | 3.3   | 1.1  | 1.1  | 2.0  | -1.5   | 0.1  | 0.7  | 0.7 |
| XLOC_008171 | 2.7   | 0.9  | 0.7  | 1.0  | -1.5   | -0.3 | 0.5  | 1.3 |
| XLOC_020294 | 5.0   | 1.6  | 1.7  | 4.1  | -1.6   | 0.1  | 1.2  | 0.3 |

---

---

|             |       |       |       |       |      |        |      |      |
|-------------|-------|-------|-------|-------|------|--------|------|------|
| XLOC_002749 | 1.8   | 0.6   | 1.0   | 0.9   | -1.6 | 0.9    | -0.1 | 0.9  |
| XLOC_002245 | 9.2   | 2.9   | 2.5   | 5.5   | -1.6 | -0.1   | 1.1  | 0.7  |
| XLOC_019002 | 2.3   | 0.7   | 0.5   | 1.0   | -1.6 | -0.3   | 0.8  | 1.1  |
| XLOC_015243 | 58.8  | 18.0  | 23.0  | 31.2  | -1.7 | 0.4    | 0.4  | 0.9  |
| XLOC_021577 | 1.8   | 0.5   | 0.8   | 1.2   | -1.8 | 0.8    | 0.5  | 0.5  |
| XLOC_003726 | 2.6   | 0.6   | 1.3   | 1.4   | -2.0 | 1.2    | -0.1 | 0.9  |
| XLOC_016489 | 4.4   | 1.0   | 1.1   | 1.5   | -2.1 | 0.2    | 0.4  | 1.5  |
| XLOC_023211 | 3.8   | 0.8   | 1.0   | 2.6   | -2.1 | 0.3    | 1.4  | 0.5  |
| XLOC_009486 | 2.0   | 0.4   | 0.7   | 1.1   | -2.2 | 0.8    | 0.6  | 0.8  |
| XLOC_016647 | 4.4   | 0.6   | 0.4   | 0.1   | -2.9 | -0.4   | -2.0 | 5.3  |
| XLOC_021537 | 8.5   | 0.4   | 1.9   | 2.8   | -4.3 | 2.3    | 0.5  | 1.6  |
| XLOC_010726 | 38.4  | 18.2  | 12.0  | 23.4  | -1.0 | -0.5   | 0.9  | 0.7  |
| XLOC_014710 | 24.8  | 7.4   | 1.8   | 12.4  | -1.7 | -2.0   | 2.7  | 0.9  |
| XLOC_001362 | 63.7  | 137.7 | 0.0   | 12.5  | 1.2  | #NAME? | inf  | 2.3  |
| XLOC_017673 | 2.5   | 3.5   | 0.8   | 1.2   | 0.5  | -2.2   | 0.6  | 1.0  |
| XLOC_017221 | 11.7  | 16.1  | 1.9   | 5.0   | 0.5  | -3.0   | 1.4  | 1.2  |
| XLOC_010560 | 13.3  | 17.6  | 5.8   | 12.5  | 0.5  | -1.6   | 1.0  | 0.0  |
| XLOC_020975 | 2.2   | 2.6   | 1.0   | 1.6   | 0.3  | -1.4   | 0.6  | 0.5  |
| XLOC_014992 | 2.7   | 3.1   | 1.4   | 2.5   | 0.3  | -1.0   | 0.7  | 0.1  |
| XLOC_014291 | 4.2   | 4.6   | 2.0   | 3.4   | 0.2  | -1.1   | 0.7  | 0.3  |
| XLOC_005180 | 2.1   | 2.2   | 0.8   | 1.4   | 0.1  | -1.4   | 0.7  | 0.5  |
| XLOC_020922 | 4.7   | 4.9   | 0.7   | 6.4   | 0.1  | -2.7   | 3.1  | -0.5 |
| XLOC_011955 | 2.3   | 2.3   | 0.8   | 1.6   | 0.0  | -1.4   | 0.8  | 0.5  |
| XLOC_015572 | 1.4   | 1.4   | 0.5   | 1.1   | 0.0  | -1.3   | 1.0  | 0.4  |
| XLOC_011308 | 3.0   | 2.4   | 1.0   | 1.7   | -0.3 | -1.2   | 0.7  | 0.8  |
| XLOC_009856 | 34.9  | 16.9  | 4.1   | 12.9  | -1.0 | -2.0   | 1.6  | 1.4  |
| XLOC_018201 | 10.8  | 23.0  | 17.8  | 10.8  | 1.1  | -0.3   | -0.8 | -0.1 |
| XLOC_016662 | 21.2  | 40.4  | 31.8  | 14.7  | 1.0  | -0.3   | -1.2 | 0.5  |
| XLOC_012450 | 39.9  | 75.3  | 69.4  | 32.0  | 1.0  | -0.1   | -1.2 | 0.3  |
| XLOC_002970 | 2.3   | 4.3   | 4.1   | 1.7   | 1.0  | 0.0    | -1.3 | 0.3  |
| XLOC_010563 | 10.1  | 18.6  | 14.5  | 6.7   | 0.9  | -0.3   | -1.2 | 0.5  |
| XLOC_020458 | 1.1   | 2.0   | 1.9   | 0.7   | 0.9  | -0.1   | -1.5 | 0.7  |
| XLOC_000032 | 45.3  | 81.9  | 72.9  | 34.3  | 0.9  | -0.1   | -1.2 | 0.3  |
| XLOC_027374 | 27.7  | 49.9  | 50.4  | 21.6  | 0.9  | 0.1    | -1.3 | 0.3  |
| XLOC_003810 | 189.3 | 337.0 | 272.4 | 112.1 | 0.9  | -0.2   | -1.4 | 0.7  |
| XLOC_015770 | 172.3 | 292.0 | 304.3 | 153.4 | 0.8  | 0.1    | -1.1 | 0.1  |
| XLOC_024554 | 22.2  | 37.5  | 42.9  | 20.3  | 0.8  | 0.3    | -1.1 | 0.1  |
| XLOC_015508 | 4.0   | 6.6   | 7.6   | 3.9   | 0.8  | 0.3    | -1.0 | 0.0  |
| XLOC_018904 | 58.7  | 97.0  | 96.8  | 45.4  | 0.8  | 0.1    | -1.2 | 0.3  |
| XLOC_012017 | 16.2  | 26.1  | 25.0  | 9.1   | 0.8  | 0.0    | -1.5 | 0.8  |
| XLOC_015376 | 166.4 | 262.0 | 296.2 | 138.3 | 0.7  | 0.2    | -1.2 | 0.2  |
| XLOC_008089 | 16.4  | 25.9  | 27.5  | 12.3  | 0.7  | 0.1    | -1.2 | 0.4  |
| XLOC_020195 | 358.9 | 543.7 | 474.6 | 227.8 | 0.7  | -0.1   | -1.1 | 0.6  |
| XLOC_020102 | 57.2  | 85.6  | 128.0 | 58.4  | 0.7  | 0.6    | -1.2 | -0.1 |

---

|             |            |        |        |        |     |      |        |      |
|-------------|------------|--------|--------|--------|-----|------|--------|------|
| XLOC_004591 | 16.5       | 23.4   | 23.9   | 11.3   | 0.6 | 0.1  | -1.2   | 0.5  |
| XLOC_018346 | 0.2        | 3.6    | 3.1    | 0.4    | 4.1 | -0.1 | -2.9   | -1.1 |
| XLOC_002436 | 0.4        | 2.1    | 2.2    | 0.2    | 2.5 | 0.1  | -3.5   | 0.9  |
| XLOC_002882 | 18.3       | 80.1   | 64.4   | 13.4   | 2.2 | -0.3 | -2.3   | 0.4  |
| XLOC_020105 | 1.9        | 7.6    | 9.3    | 2.1    | 2.1 | 0.4  | -2.2   | -0.3 |
| XLOC_023188 | 23.7       | 83.7   | 109.7  | 22.4   | 1.9 | 0.5  | -2.4   | 0.0  |
| XLOC_005561 | 20.9       | 69.3   | 66.7   | 16.9   | 1.8 | 0.0  | -2.1   | 0.3  |
| XLOC_005482 | 81.1       | 261.2  | 184.7  | 38.9   | 1.8 | -0.4 | -2.3   | 1.0  |
| XLOC_021238 | 11.5       | 32.5   | 32.0   | 9.8    | 1.6 | 0.0  | -1.8   | 0.2  |
| XLOC_017455 | 1.4        | 3.6    | 8.0    | 1.0    | 1.5 | 1.2  | -3.0   | 0.4  |
| XLOC_020355 | 44.0       | 115.6  | 104.1  | 27.3   | 1.5 | -0.1 | -2.0   | 0.6  |
| XLOC_017071 | 0.6        | 1.4    | 2.5    | 0.4    | 1.4 | 0.9  | -2.7   | 0.5  |
| XLOC_025368 | 9.8        | 23.0   | 21.9   | 9.5    | 1.3 | 0.0  | -1.3   | 0.0  |
| XLOC_019606 | 704.7      | 1670.2 | 1762.4 | 568.6  | 1.3 | 0.1  | -1.7   | 0.3  |
| XLOC_000039 | 1.3        | 2.8    | 14.0   | 0.9    | 1.2 | 2.4  | -4.0   | 0.5  |
| XLOC_021911 | 29.1       | 62.1   | 91.3   | 23.2   | 1.2 | 0.6  | -2.0   | 0.3  |
| XLOC_002902 | 0.5        | 1.1    | 2.1    | 0.4    | 1.1 | 1.0  | -2.3   | 0.2  |
| XLOC_012196 | 1056.<br>4 | 2190.4 | 2685.1 | 617.3  | 1.1 | 0.4  | -2.2   | 0.7  |
| XLOC_025296 | 6.7        | 13.8   | 14.9   | 6.4    | 1.1 | 0.2  | -1.3   | 0.0  |
| XLOC_015687 | 4.4        | 9.0    | 11.1   | 3.9    | 1.1 | 0.4  | -1.6   | 0.1  |
| XLOC_005849 | 64.4       | 129.8  | 108.0  | 47.4   | 1.1 | -0.2 | -1.3   | 0.4  |
| XLOC_022615 | 640.3      | 1296.5 | 1591.7 | 364.7  | 1.1 | 0.4  | -2.2   | 0.8  |
| XLOC_015556 | 39.5       | 78.2   | 83.5   | 41.0   | 1.1 | 0.2  | -1.1   | -0.1 |
| XLOC_016284 | 0.9        | 1.7    | 1.5    | 0.5    | 1.0 | -0.1 | -1.6   | 0.7  |
| XLOC_027955 | 1.0        | 1.9    | 2.0    | 0.6    | 1.0 | 0.2  | -1.9   | 0.7  |
| XLOC_017839 | 2.1        | 4.0    | 2.8    | 1.1    | 1.0 | -0.4 | -1.4   | 0.8  |
| XLOC_013600 | 85.0       | 159.4  | 269.1  | 53.9   | 1.0 | 0.8  | -2.4   | 0.6  |
| XLOC_009568 | 0.7        | 1.4    | 1.5    | 0.5    | 1.0 | 0.2  | -1.6   | 0.4  |
| XLOC_007040 | 0.9        | 1.8    | 2.1    | 0.5    | 1.0 | 0.3  | -2.0   | 0.8  |
| XLOC_012194 | 1432.<br>1 | 2679.2 | 3461.2 | 832.9  | 1.0 | 0.4  | -2.1   | 0.7  |
| XLOC_019007 | 12.7       | 23.0   | 39.5   | 11.4   | 0.9 | 0.8  | -1.9   | 0.1  |
| XLOC_004174 | 1.1        | 1.9    | 1.8    | 0.0    | 0.9 | 0.0  | #NAME? | inf  |
| XLOC_001165 | 2260.<br>4 | 4006.6 | 5234.2 | 1184.0 | 0.9 | 0.4  | -2.2   | 0.9  |
| XLOC_009737 | 5.7        | 10.0   | 11.7   | 4.3    | 0.9 | 0.3  | -1.5   | 0.3  |
| XLOC_011379 | 10.3       | 18.1   | 20.4   | 10.7   | 0.9 | 0.2  | -1.0   | -0.1 |
| XLOC_016142 | 1.5        | 2.7    | 4.8    | 1.2    | 0.9 | 0.9  | -2.0   | 0.3  |
| XLOC_008382 | 6.1        | 10.6   | 9.5    | 4.3    | 0.9 | -0.1 | -1.2   | 0.4  |
| XLOC_021979 | 45.6       | 82.3   | 86.9   | 43.9   | 0.8 | 0.1  | -1.1   | 0.1  |
| XLOC_009819 | 2.6        | 4.4    | 4.0    | 2.1    | 0.8 | -0.1 | -1.0   | 0.3  |
| XLOC_022468 | 1.2        | 1.9    | 1.2    | 0.3    | 0.8 | -0.7 | -2.0   | 1.8  |
| XLOC_015197 | 4.4        | 7.3    | 7.1    | 2.2    | 0.8 | 0.0  | -1.8   | 0.9  |



---

|             |       |       |       |       |     |      |        |     |
|-------------|-------|-------|-------|-------|-----|------|--------|-----|
| XLOC_024217 | 3.1   | 5.2   | 5.9   | 3.0   | 0.8 | 0.3  | -1.0   | 0.0 |
| XLOC_001029 | 1.3   | 2.2   | 4.6   | 1.2   | 0.8 | 1.1  | -2.0   | 0.0 |
| XLOC_015031 | 15.4  | 25.8  | 38.1  | 10.5  | 0.8 | 0.6  | -1.9   | 0.5 |
| XLOC_022691 | 50.3  | 87.6  | 82.4  | 33.8  | 0.8 | 0.0  | -1.4   | 0.6 |
| XLOC_025101 | 1.5   | 2.5   | 1.6   | 0.5   | 0.8 | -0.5 | -1.6   | 1.4 |
| XLOC_004501 | 219.6 | 352.6 | 321.8 | 167.0 | 0.8 | -0.1 | -1.0   | 0.3 |
| XLOC_006401 | 15.4  | 24.7  | 28.7  | 13.6  | 0.8 | 0.3  | -1.1   | 0.1 |
| XLOC_022502 | 6.1   | 9.8   | 11.6  | 4.0   | 0.7 | 0.3  | -1.6   | 0.6 |
| XLOC_021735 | 8.7   | 13.7  | 11.4  | 5.7   | 0.7 | -0.2 | -1.1   | 0.5 |
| XLOC_019072 | 9.5   | 14.9  | 37.3  | 7.7   | 0.7 | 1.4  | -2.3   | 0.2 |
| XLOC_016441 | 3.0   | 4.7   | 4.2   | 1.7   | 0.7 | -0.1 | -1.3   | 0.7 |
| XLOC_018970 | 13.0  | 20.3  | 23.3  | 10.8  | 0.7 | 0.3  | -1.2   | 0.2 |
| XLOC_017467 | 14.0  | 21.4  | 13.3  | 4.2   | 0.7 | -0.6 | -1.7   | 1.7 |
| XLOC_002913 | 4.2   | 6.5   | 6.8   | 1.8   | 0.7 | 0.1  | -2.0   | 1.2 |
| XLOC_020442 | 100.7 | 155.2 | 111.3 | 53.8  | 0.7 | -0.4 | -1.1   | 0.9 |
| XLOC_009350 | 19.0  | 29.2  | 21.0  | 8.1   | 0.7 | -0.4 | -1.4   | 1.2 |
| XLOC_027066 | 0.6   | 0.9   | 2.0   | 0.5   | 0.7 | 1.2  | -2.1   | 0.2 |
| XLOC_021365 | 15.6  | 23.9  | 29.3  | 14.2  | 0.7 | 0.4  | -1.1   | 0.1 |
| XLOC_001031 | 9.6   | 14.7  | 16.1  | 5.7   | 0.7 | 0.2  | -1.6   | 0.7 |
| XLOC_004963 | 155.4 | 234.5 | 227.1 | 118.6 | 0.7 | 0.0  | -1.0   | 0.3 |
| XLOC_012911 | 4.3   | 6.4   | 7.7   | 3.3   | 0.7 | 0.3  | -1.3   | 0.3 |
| XLOC_009859 | 7.9   | 11.9  | 13.8  | 6.8   | 0.6 | 0.3  | -1.1   | 0.2 |
| XLOC_005509 | 12.8  | 18.8  | 22.0  | 9.7   | 0.6 | 0.3  | -1.3   | 0.3 |
| XLOC_019646 | 26.9  | 39.5  | 49.9  | 15.7  | 0.6 | 0.4  | -1.7   | 0.7 |
| XLOC_013631 | 2.0   | 2.9   | 3.7   | 1.3   | 0.6 | 0.4  | -1.5   | 0.5 |
| XLOC_016805 | 21.5  | 31.6  | 32.6  | 11.0  | 0.6 | 0.1  | -1.6   | 0.9 |
| XLOC_005960 | 1.3   | 1.9   | 2.9   | 1.3   | 0.6 | 0.6  | -1.2   | 0.0 |
| XLOC_001803 | 189.3 | 276.7 | 674.8 | 0.0   | 0.6 | 1.3  | #NAME? | inf |
| XLOC_011740 | 25.1  | 36.2  | 44.5  | 21.9  | 0.6 | 0.4  | -1.1   | 0.1 |
| XLOC_024165 | 583.8 | 833.7 | 872.2 | 455.9 | 0.6 | 0.1  | -1.0   | 0.3 |
| XLOC_008715 | 11.6  | 16.7  | 19.6  | 8.9   | 0.6 | 0.3  | -1.2   | 0.3 |
| XLOC_023070 | 5.8   | 8.2   | 9.2   | 3.9   | 0.6 | 0.2  | -1.3   | 0.5 |
| XLOC_015930 | 4.0   | 5.6   | 7.1   | 3.6   | 0.6 | 0.4  | -1.0   | 0.1 |
| XLOC_021278 | 37.5  | 53.2  | 64.7  | 32.1  | 0.6 | 0.3  | -1.1   | 0.2 |
| XLOC_002139 | 1.7   | 2.4   | 8.3   | 1.3   | 0.6 | 1.8  | -2.8   | 0.4 |
| XLOC_008337 | 8.4   | 11.8  | 13.3  | 6.8   | 0.5 | 0.2  | -1.0   | 0.3 |
| XLOC_012912 | 2.1   | 2.9   | 3.6   | 1.4   | 0.5 | 0.4  | -1.5   | 0.6 |
| XLOC_001587 | 25.1  | 34.3  | 39.2  | 19.4  | 0.5 | 0.2  | -1.1   | 0.3 |
| XLOC_013505 | 5.1   | 6.8   | 7.4   | 3.3   | 0.5 | 0.2  | -1.2   | 0.5 |
| XLOC_010153 | 4.5   | 6.0   | 6.9   | 3.3   | 0.5 | 0.3  | -1.1   | 0.4 |
| XLOC_016836 | 1.4   | 1.9   | 3.0   | 0.7   | 0.5 | 0.7  | -2.1   | 0.9 |
| XLOC_025038 | 18.3  | 24.4  | 24.6  | 9.4   | 0.5 | 0.1  | -1.5   | 0.9 |
| XLOC_019282 | 1.1   | 1.4   | 2.5   | 0.4   | 0.5 | 0.9  | -2.7   | 1.4 |
| XLOC_004976 | 15.6  | 20.7  | 14.9  | 7.7   | 0.5 | -0.4 | -1.0   | 1.0 |

---

---

|             |       |       |       |       |      |      |      |      |
|-------------|-------|-------|-------|-------|------|------|------|------|
| XLOC_010173 | 4.9   | 6.5   | 10.3  | 4.9   | 0.5  | 0.7  | -1.1 | -0.1 |
| XLOC_023217 | 6.3   | 8.3   | 9.5   | 3.4   | 0.5  | 0.2  | -1.5 | 0.8  |
| XLOC_021459 | 5.0   | 6.6   | 6.3   | 2.4   | 0.4  | 0.0  | -1.5 | 1.0  |
| XLOC_014718 | 1.1   | 1.4   | 1.5   | 0.7   | 0.4  | 0.1  | -1.2 | 0.7  |
| XLOC_027536 | 1.4   | 1.8   | 1.6   | 0.6   | 0.4  | -0.1 | -1.5 | 1.1  |
| XLOC_002654 | 32.7  | 41.6  | 54.3  | 27.3  | 0.4  | 0.4  | -1.1 | 0.2  |
| XLOC_001105 | 546.2 | 702.3 | 770.4 | 370.1 | 0.4  | 0.2  | -1.1 | 0.5  |
| XLOC_004890 | 133.0 | 167.0 | 212.0 | 85.4  | 0.4  | 0.4  | -1.4 | 0.6  |
| XLOC_002897 | 7.8   | 9.6   | 11.2  | 5.8   | 0.4  | 0.3  | -1.0 | 0.4  |
| XLOC_011666 | 5.5   | 6.8   | 12.3  | 5.3   | 0.4  | 0.9  | -1.3 | 0.0  |
| XLOC_019094 | 11.3  | 13.6  | 17.5  | 9.2   | 0.4  | 0.4  | -1.0 | 0.2  |
| XLOC_010891 | 25.0  | 30.1  | 40.2  | 20.7  | 0.3  | 0.5  | -1.0 | 0.2  |
| XLOC_005560 | 3.2   | 3.9   | 4.2   | 1.6   | 0.3  | 0.2  | -1.4 | 0.9  |
| XLOC_016597 | 14.8  | 17.8  | 23.1  | 11.6  | 0.3  | 0.4  | -1.1 | 0.3  |
| XLOC_016823 | 8.1   | 9.7   | 14.4  | 6.2   | 0.3  | 0.6  | -1.3 | 0.3  |
| XLOC_011484 | 1.0   | 1.2   | 1.8   | 0.6   | 0.3  | 0.6  | -1.7 | 0.7  |
| XLOC_023987 | 4.6   | 5.5   | 6.3   | 3.2   | 0.3  | 0.2  | -1.0 | 0.5  |
| XLOC_025464 | 1.9   | 2.3   | 2.9   | 1.3   | 0.3  | 0.4  | -1.3 | 0.6  |
| XLOC_000298 | 112.8 | 131.5 | 510.0 | 83.5  | 0.3  | 2.0  | -2.7 | 0.4  |
| XLOC_021617 | 1.4   | 1.6   | 4.3   | 0.8   | 0.3  | 1.5  | -2.5 | 0.7  |
| XLOC_007137 | 4.1   | 4.8   | 6.1   | 2.4   | 0.3  | 0.4  | -1.4 | 0.7  |
| XLOC_020178 | 1.6   | 1.8   | 2.9   | 1.4   | 0.3  | 0.8  | -1.1 | 0.1  |
| XLOC_008105 | 1.5   | 1.7   | 1.9   | 0.9   | 0.2  | 0.3  | -1.1 | 0.6  |
| XLOC_012313 | 2.2   | 2.5   | 2.3   | 1.0   | 0.2  | 0.0  | -1.4 | 1.1  |
| XLOC_022156 | 1.2   | 1.3   | 1.1   | 0.5   | 0.2  | -0.2 | -1.1 | 1.1  |
| XLOC_016982 | 7.9   | 8.7   | 11.8  | 4.3   | 0.2  | 0.5  | -1.5 | 0.8  |
| XLOC_011288 | 16.9  | 18.3  | 22.8  | 11.7  | 0.2  | 0.4  | -1.0 | 0.5  |
| XLOC_025640 | 2.2   | 2.3   | 3.3   | 1.5   | 0.2  | 0.6  | -1.2 | 0.5  |
| XLOC_001924 | 1.2   | 1.2   | 2.4   | 0.5   | 0.1  | 1.0  | -2.3 | 1.2  |
| XLOC_021535 | 2.0   | 1.8   | 2.8   | 1.4   | -0.1 | 0.7  | -1.1 | 0.5  |
| XLOC_027708 | 9.4   | 4.5   | 3.6   | 6.0   | -1.0 | -0.3 | 0.7  | 0.6  |
| XLOC_027544 | 13.7  | 6.4   | 6.6   | 10.6  | -1.0 | 0.1  | 0.6  | 0.3  |
| XLOC_007392 | 7.7   | 3.6   | 3.4   | 6.7   | -1.0 | 0.0  | 0.9  | 0.1  |
| XLOC_009163 | 5.6   | 2.6   | 2.3   | 4.0   | -1.0 | -0.1 | 0.7  | 0.4  |
| XLOC_010678 | 4.4   | 2.0   | 1.9   | 3.8   | -1.0 | -0.1 | 1.0  | 0.1  |
| XLOC_015318 | 187.5 | 85.6  | 92.9  | 150.9 | -1.1 | 0.2  | 0.6  | 0.3  |
| XLOC_006796 | 10.4  | 4.7   | 4.2   | 8.2   | -1.1 | -0.1 | 0.9  | 0.3  |
| XLOC_018360 | 8.6   | 3.9   | 3.4   | 6.5   | -1.1 | -0.1 | 0.9  | 0.3  |
| XLOC_007909 | 14.0  | 6.2   | 5.7   | 10.1  | -1.1 | -0.1 | 0.8  | 0.4  |
| XLOC_014866 | 7.8   | 3.4   | 2.8   | 5.5   | -1.1 | -0.2 | 0.9  | 0.5  |
| XLOC_023424 | 7.1   | 3.2   | 3.2   | 4.7   | -1.1 | 0.1  | 0.5  | 0.6  |
| XLOC_007070 | 1.9   | 0.8   | 0.9   | 1.6   | -1.1 | 0.3  | 0.7  | 0.1  |
| XLOC_025403 | 15.9  | 6.6   | 7.5   | 14.6  | -1.2 | 0.2  | 0.9  | 0.1  |
| XLOC_026361 | 16.2  | 6.4   | 6.5   | 10.6  | -1.3 | 0.1  | 0.6  | 0.6  |

---

---

|             |       |       |       |       |      |        |      |      |
|-------------|-------|-------|-------|-------|------|--------|------|------|
| XLOC_008442 | 91.4  | 33.9  | 25.6  | 48.0  | -1.4 | -0.3   | 0.8  | 0.9  |
| XLOC_002473 | 5.3   | 1.8   | 1.8   | 3.4   | -1.5 | 0.1    | 0.8  | 0.6  |
| XLOC_012536 | 1.6   | 0.5   | 0.7   | 1.4   | -1.5 | 0.5    | 0.9  | 0.2  |
| XLOC_023457 | 28.2  | 15.6  | 10.7  | 24.8  | -0.8 | -0.5   | 1.1  | 0.1  |
| XLOC_021424 | 2.1   | 1.1   | 0.9   | 1.8   | -0.8 | -0.4   | 1.0  | 0.1  |
| XLOC_005801 | 2.3   | 1.1   | 0.8   | 1.8   | -0.9 | -0.4   | 1.1  | 0.3  |
| XLOC_025612 | 3.1   | 4.1   | 0.9   | 4.7   | 0.5  | -2.1   | 2.3  | -0.7 |
| XLOC_002745 | 2.6   | 2.8   | 1.1   | 4.5   | 0.2  | -1.2   | 1.9  | -0.9 |
| XLOC_026250 | 3.7   | 2.9   | 1.6   | 3.8   | -0.3 | -0.8   | 1.2  | -0.1 |
| XLOC_004332 | 2.3   | 1.8   | 0.5   | 2.3   | -0.3 | -1.9   | 2.2  | 0.0  |
| XLOC_022257 | 8.2   | 5.6   | 3.1   | 6.8   | -0.5 | -0.8   | 1.1  | 0.2  |
| XLOC_010999 | 1.6   | 1.0   | 0.6   | 1.4   | -0.7 | -0.7   | 1.3  | 0.1  |
| XLOC_020205 | 3.5   | 2.1   | 1.2   | 2.9   | -0.7 | -0.8   | 1.2  | 0.2  |
| XLOC_017062 | 2.3   | 1.3   | 0.9   | 1.9   | -0.8 | -0.6   | 1.1  | 0.2  |
| XLOC_013100 | 3.7   | 1.7   | 1.1   | 2.9   | -1.0 | -0.6   | 1.3  | 0.3  |
| XLOC_001456 | 1.3   | 0.6   | 1.2   | 3.1   | -1.1 | 1.2    | 1.3  | -1.4 |
| XLOC_010969 | 130.7 | 214.8 | 65.6  | 155.1 | 0.8  | -1.7   | 1.2  | -0.3 |
| XLOC_017914 | 2.5   | 3.6   | 0.8   | 3.9   | 0.6  | -2.1   | 2.2  | -0.7 |
| XLOC_026223 | 696.5 | 922.8 | 377.0 | 755.6 | 0.5  | -1.2   | 0.9  | -0.2 |
| XLOC_005432 | 9.4   | 10.9  | 4.9   | 9.2   | 0.3  | -1.1   | 0.8  | 0.0  |
| XLOC_008159 | 1.8   | 2.0   | 0.3   | 1.1   | 0.2  | -2.6   | 1.8  | 0.6  |
| XLOC_001081 | 3.2   | 3.5   | 0.0   | 4.9   | 0.2  | #NAME? | inf  | -0.6 |
| XLOC_002115 | 9.0   | 9.5   | 4.5   | 7.9   | 0.2  | -1.0   | 0.7  | 0.1  |
| XLOC_021873 | 22.3  | 23.6  | 8.2   | 22.2  | 0.1  | -1.5   | 1.4  | -0.1 |
| XLOC_020261 | 4.6   | 4.5   | 1.8   | 6.3   | 0.0  | -1.3   | 1.7  | -0.5 |
| XLOC_015972 | 7.9   | 7.3   | 3.3   | 8.6   | -0.1 | -1.1   | 1.3  | -0.2 |
| XLOC_010316 | 9.3   | 7.4   | 2.4   | 7.2   | -0.3 | -1.6   | 1.5  | 0.3  |
| XLOC_013750 | 4.2   | 2.6   | 2.4   | 1.5   | -0.6 | -0.1   | -0.7 | 1.4  |
| XLOC_015157 | 22.5  | 13.8  | 10.8  | 9.6   | -0.6 | -0.3   | -0.2 | 1.2  |
| XLOC_021825 | 50.6  | 29.2  | 29.5  | 19.5  | -0.7 | 0.1    | -0.7 | 1.3  |
| XLOC_009266 | 8.6   | 4.9   | 4.6   | 3.0   | -0.8 | 0.0    | -0.7 | 1.5  |
| XLOC_009908 | 53.0  | 28.1  | 26.9  | 20.6  | -0.9 | 0.0    | -0.5 | 1.3  |
| XLOC_007444 | 8.0   | 2.9   | 1.6   | 0.7   | -1.4 | -0.8   | -1.3 | 3.5  |
| XLOC_007728 | 23.4  | 35.6  | 19.5  | 10.1  | 0.7  | -0.8   | -1.0 | 1.1  |
| XLOC_010640 | 3.3   | 4.3   | 2.7   | 1.4   | 0.4  | -0.6   | -1.1 | 1.2  |
| XLOC_025539 | 4.4   | 5.6   | 3.4   | 2.0   | 0.4  | -0.7   | -0.8 | 1.1  |
| XLOC_020318 | 2.0   | 2.5   | 1.7   | 0.9   | 0.4  | -0.5   | -0.9 | 1.0  |
| XLOC_013673 | 2.0   | 2.5   | 1.7   | 0.7   | 0.4  | -0.5   | -1.4 | 1.5  |
| XLOC_027231 | 18.1  | 22.0  | 14.4  | 7.3   | 0.3  | -0.6   | -1.0 | 1.3  |
| XLOC_004040 | 4.5   | 5.4   | 3.6   | 1.9   | 0.3  | -0.5   | -1.0 | 1.2  |
| XLOC_020204 | 4.2   | 5.0   | 2.6   | 1.6   | 0.3  | -0.9   | -0.8 | 1.4  |
| XLOC_022352 | 11.1  | 13.0  | 8.7   | 4.2   | 0.3  | -0.5   | -1.1 | 1.4  |
| XLOC_009181 | 3.4   | 3.9   | 2.5   | 0.6   | 0.3  | -0.6   | -2.1 | 2.3  |
| XLOC_011478 | 2.3   | 2.6   | 1.7   | 0.9   | 0.3  | -0.5   | -1.0 | 1.3  |

---

---

|             |      |      |      |      |      |      |      |     |
|-------------|------|------|------|------|------|------|------|-----|
| XLOC_005820 | 6.5  | 7.4  | 5.3  | 3.0  | 0.3  | -0.4 | -0.9 | 1.1 |
| XLOC_012399 | 8.0  | 9.0  | 7.4  | 3.2  | 0.2  | -0.2 | -1.3 | 1.3 |
| XLOC_019972 | 1.6  | 1.8  | 1.2  | 0.7  | 0.2  | -0.5 | -0.8 | 1.0 |
| XLOC_000415 | 3.1  | 3.5  | 2.1  | 1.3  | 0.2  | -0.7 | -0.7 | 1.2 |
| XLOC_010551 | 2.4  | 2.6  | 1.5  | 0.9  | 0.2  | -0.7 | -0.9 | 1.4 |
| XLOC_005436 | 10.6 | 11.4 | 8.6  | 4.2  | 0.2  | -0.3 | -1.1 | 1.3 |
| XLOC_022382 | 3.1  | 3.4  | 2.6  | 1.1  | 0.2  | -0.3 | -1.3 | 1.5 |
| XLOC_003210 | 12.1 | 13.1 | 8.8  | 4.9  | 0.2  | -0.5 | -0.9 | 1.2 |
| XLOC_018306 | 8.2  | 8.7  | 6.9  | 3.2  | 0.2  | -0.3 | -1.2 | 1.3 |
| XLOC_014569 | 82.4 | 88.0 | 73.1 | 35.5 | 0.2  | -0.2 | -1.1 | 1.2 |
| XLOC_011961 | 2.1  | 2.3  | 1.1  | 0.8  | 0.2  | -1.0 | -0.6 | 1.4 |
| XLOC_024682 | 2.4  | 2.6  | 1.6  | 1.0  | 0.2  | -0.6 | -0.7 | 1.2 |
| XLOC_011700 | 13.6 | 14.5 | 8.8  | 6.2  | 0.2  | -0.7 | -0.6 | 1.1 |
| XLOC_007795 | 1.6  | 1.7  | 1.3  | 0.5  | 0.1  | -0.3 | -1.4 | 1.6 |
| XLOC_025699 | 2.8  | 2.9  | 1.8  | 1.1  | 0.1  | -0.6 | -0.8 | 1.3 |
| XLOC_023313 | 3.2  | 3.2  | 2.0  | 1.0  | 0.1  | -0.6 | -1.0 | 1.5 |
| XLOC_015708 | 13.0 | 13.8 | 7.4  | 4.7  | 0.1  | -0.8 | -0.7 | 1.4 |
| XLOC_020087 | 3.1  | 3.2  | 2.1  | 1.2  | 0.1  | -0.6 | -0.9 | 1.3 |
| XLOC_003083 | 2.6  | 2.6  | 1.6  | 1.1  | 0.1  | -0.7 | -0.5 | 1.1 |
| XLOC_015127 | 4.3  | 4.4  | 2.9  | 1.5  | 0.1  | -0.6 | -1.0 | 1.5 |
| XLOC_012641 | 47.4 | 48.3 | 29.2 | 21.4 | 0.1  | -0.7 | -0.5 | 1.1 |
| XLOC_003985 | 22.8 | 23.0 | 14.5 | 10.6 | 0.1  | -0.6 | -0.5 | 1.1 |
| XLOC_026411 | 3.4  | 3.4  | 2.3  | 1.0  | 0.1  | -0.5 | -1.3 | 1.7 |
| XLOC_014620 | 2.6  | 2.6  | 1.8  | 1.1  | 0.0  | -0.5 | -0.7 | 1.1 |
| XLOC_011124 | 2.1  | 2.0  | 1.6  | 0.8  | 0.0  | -0.3 | -1.1 | 1.4 |
| XLOC_025764 | 2.6  | 2.6  | 2.0  | 1.0  | 0.0  | -0.3 | -1.1 | 1.4 |
| XLOC_004808 | 3.8  | 3.7  | 2.7  | 1.7  | 0.0  | -0.4 | -0.7 | 1.1 |
| XLOC_012972 | 1.7  | 1.6  | 1.1  | 0.6  | 0.0  | -0.5 | -1.0 | 1.5 |
| XLOC_026262 | 17.5 | 16.7 | 13.5 | 7.6  | 0.0  | -0.2 | -0.9 | 1.1 |
| XLOC_002432 | 3.7  | 3.5  | 2.9  | 1.6  | 0.0  | -0.2 | -1.0 | 1.2 |
| XLOC_009583 | 4.0  | 3.7  | 2.5  | 1.3  | 0.0  | -0.5 | -1.0 | 1.5 |
| XLOC_027862 | 4.3  | 4.1  | 2.9  | 1.8  | 0.0  | -0.5 | -0.8 | 1.3 |
| XLOC_003190 | 4.9  | 4.7  | 3.1  | 2.1  | 0.0  | -0.6 | -0.6 | 1.2 |
| XLOC_009040 | 4.6  | 4.4  | 3.7  | 1.8  | 0.0  | -0.2 | -1.1 | 1.4 |
| XLOC_005547 | 12.3 | 11.5 | 8.9  | 5.9  | 0.0  | -0.3 | -0.7 | 1.0 |
| XLOC_010586 | 35.5 | 32.8 | 17.5 | 13.7 | 0.0  | -0.9 | -0.4 | 1.3 |
| XLOC_003016 | 6.1  | 5.6  | 4.1  | 2.4  | 0.0  | -0.4 | -0.8 | 1.3 |
| XLOC_019950 | 3.4  | 3.0  | 2.5  | 1.4  | -0.1 | -0.2 | -0.9 | 1.2 |
| XLOC_014821 | 1.7  | 1.5  | 1.0  | 0.7  | -0.1 | -0.5 | -0.6 | 1.2 |
| XLOC_018779 | 3.4  | 3.0  | 1.9  | 1.6  | -0.1 | -0.6 | -0.3 | 1.0 |
| XLOC_002496 | 30.2 | 26.3 | 19.6 | 14.3 | -0.1 | -0.4 | -0.5 | 1.0 |
| XLOC_017539 | 1.7  | 1.5  | 1.1  | 0.4  | -0.1 | -0.4 | -1.5 | 2.1 |
| XLOC_009076 | 2.4  | 2.1  | 1.7  | 1.1  | -0.1 | -0.2 | -0.8 | 1.1 |
| XLOC_000002 | 2.4  | 2.0  | 1.3  | 0.9  | -0.2 | -0.6 | -0.5 | 1.3 |

---

|             |            |        |        |       |      |      |      |     |
|-------------|------------|--------|--------|-------|------|------|------|-----|
| XLOC_011314 | 3.1        | 2.5    | 1.7    | 1.4   | -0.2 | -0.5 | -0.3 | 1.0 |
| XLOC_026787 | 4.6        | 3.8    | 2.6    | 1.9   | -0.2 | -0.5 | -0.5 | 1.2 |
| XLOC_017391 | 3.7        | 2.9    | 1.2    | 1.4   | -0.3 | -1.3 | 0.1  | 1.4 |
| XLOC_019530 | 4.4        | 3.4    | 2.9    | 1.5   | -0.3 | -0.2 | -1.0 | 1.5 |
| XLOC_002933 | 2.6        | 2.0    | 1.8    | 1.0   | -0.3 | -0.1 | -0.9 | 1.3 |
| XLOC_004957 | 1.8        | 1.4    | 1.1    | 0.7   | -0.3 | -0.2 | -0.8 | 1.3 |
| XLOC_014267 | 11.3       | 8.7    | 5.3    | 4.4   | -0.3 | -0.7 | -0.3 | 1.3 |
| XLOC_002034 | 2.9        | 2.1    | 2.3    | 1.3   | -0.3 | 0.2  | -0.9 | 1.1 |
| XLOC_020564 | 11.1       | 8.4    | 6.3    | 4.9   | -0.4 | -0.3 | -0.5 | 1.1 |
| XLOC_013362 | 2.0        | 1.5    | 1.3    | 0.9   | -0.4 | -0.1 | -0.6 | 1.1 |
| XLOC_012400 | 2.9        | 2.1    | 1.7    | 1.2   | -0.4 | -0.2 | -0.6 | 1.2 |
| XLOC_007635 | 41.6       | 29.1   | 25.8   | 17.8  | -0.5 | -0.1 | -0.6 | 1.2 |
| XLOC_017505 | 4.9        | 3.2    | 3.1    | 2.2   | -0.5 | 0.0  | -0.6 | 1.1 |
| XLOC_006759 | 8.3        | 5.5    | 3.2    | 3.3   | -0.5 | -0.7 | 0.0  | 1.3 |
| XLOC_010921 | 24.7       | 16.1   | 12.1   | 7.7   | -0.6 | -0.4 | -0.7 | 1.6 |
| XLOC_006371 | 2.2        | 1.3    | 0.6    | 0.6   | -0.7 | -1.0 | -0.1 | 1.8 |
| XLOC_021502 | 1.7        | 1.0    | 1.0    | 0.7   | -0.7 | 0.0  | -0.5 | 1.2 |
| XLOC_026195 | 2.5        | 1.4    | 1.1    | 0.8   | -0.7 | -0.3 | -0.5 | 1.5 |
| XLOC_012909 | 17.5       | 8.6    | 9.8    | 6.7   | -1.0 | 0.2  | -0.6 | 1.3 |
| XLOC_010716 | 3.4        | 1.6    | 1.6    | 1.0   | -1.1 | 0.1  | -0.8 | 1.7 |
| XLOC_018939 | 1.8        | 0.8    | 1.0    | 0.5   | -1.1 | 0.4  | -1.0 | 1.7 |
| XLOC_001579 | 6139.<br>4 | 2436.9 | 2204.3 | 750.5 | -1.3 | -0.1 | -1.6 | 3.0 |
| XLOC_004365 | 15.8       | 5.3    | 2.4    | 1.9   | -1.5 | -1.1 | -0.4 | 3.0 |
| XLOC_027451 | 78.7       | 45.7   | 31.2   | 27.4  | -0.7 | -0.5 | -0.3 | 1.5 |
| XLOC_010715 | 65.1       | 37.1   | 19.3   | 15.4  | -0.7 | -0.9 | -0.4 | 2.0 |
| XLOC_011232 | 184.8      | 91.1   | 46.1   | 34.7  | -1.0 | -0.9 | -0.5 | 2.4 |
| XLOC_022553 | 10.9       | 3.7    | 1.2    | 0.8   | -1.5 | -1.6 | -0.7 | 3.7 |
| XLOC_022959 | 84.5       | 21.0   | 5.6    | 3.6   | -1.9 | -1.8 | -0.7 | 4.5 |
| XLOC_010331 | 4.8        | 10.3   | 2.5    | 0.2   | 1.2  | -2.0 | -3.5 | 4.3 |
| XLOC_009437 | 3.7        | 6.1    | 2.3    | 1.4   | 0.8  | -1.4 | -0.7 | 1.3 |
| XLOC_018841 | 4.0        | 5.9    | 2.5    | 0.7   | 0.6  | -1.2 | -1.9 | 2.5 |
| XLOC_004150 | 4.6        | 6.6    | 2.6    | 1.6   | 0.6  | -1.3 | -0.8 | 1.5 |
| XLOC_027015 | 1673.<br>3 | 2125.5 | 453.1  | 264.9 | 0.4  | -2.2 | -0.8 | 2.6 |
| XLOC_003876 | 3.9        | 4.8    | 2.8    | 1.1   | 0.4  | -0.7 | -1.4 | 1.7 |
| XLOC_016353 | 4.2        | 5.3    | 2.8    | 1.3   | 0.4  | -0.9 | -1.2 | 1.6 |
| XLOC_026943 | 3.5        | 4.4    | 2.1    | 1.3   | 0.4  | -1.0 | -0.8 | 1.4 |
| XLOC_022099 | 40.8       | 47.0   | 18.1   | 18.6  | 0.3  | -1.3 | 0.0  | 1.1 |
| XLOC_003338 | 3.3        | 3.7    | 1.2    | 1.1   | 0.2  | -1.6 | -0.3 | 1.6 |
| XLOC_017407 | 5.5        | 6.2    | 2.6    | 2.3   | 0.2  | -1.2 | -0.2 | 1.2 |
| XLOC_012959 | 101.7      | 114.2  | 71.4   | 39.5  | 0.2  | -0.6 | -0.9 | 1.3 |
| XLOC_005945 | 38.2       | 42.5   | 24.7   | 18.1  | 0.2  | -0.7 | -0.5 | 1.0 |
| XLOC_012187 | 21.4       | 21.8   | 14.8   | 6.9   | 0.1  | -0.5 | -1.2 | 1.6 |

|             |            |        |        |        |      |        |      |     |
|-------------|------------|--------|--------|--------|------|--------|------|-----|
| XLOC_009794 | 4.6        | 4.2    | 2.4    | 2.2    | -0.1 | -0.8   | -0.2 | 1.0 |
| XLOC_000425 | 4.2        | 3.7    | 0.0    | 0.0    | -0.1 | #NAME? | inf  | 6.6 |
| XLOC_002941 | 23.2       | 19.1   | 7.0    | 6.5    | -0.2 | -1.4   | -0.2 | 1.8 |
| XLOC_011615 | 32.4       | 26.2   | 16.9   | 12.1   | -0.2 | -0.6   | -0.6 | 1.4 |
| XLOC_017922 | 4.0        | 3.1    | 1.9    | 0.9    | -0.3 | -0.6   | -1.2 | 2.1 |
| XLOC_015404 | 400.4      | 302.4  | 134.8  | 150.1  | -0.3 | -1.1   | 0.1  | 1.4 |
| XLOC_017585 | 5.4        | 4.1    | 1.0    | 1.5    | -0.3 | -2.0   | 0.6  | 1.8 |
| XLOC_013551 | 4.4        | 3.3    | 1.5    | 1.4    | -0.4 | -1.1   | -0.2 | 1.6 |
| XLOC_012188 | 112.7      | 82.6   | 52.1   | 49.6   | -0.4 | -0.6   | -0.1 | 1.1 |
| XLOC_007923 | 24.2       | 17.9   | 9.3    | 10.2   | -0.4 | -0.9   | 0.1  | 1.2 |
| XLOC_019766 | 15.3       | 11.2   | 4.1    | 3.5    | -0.4 | -1.4   | -0.3 | 2.1 |
| XLOC_010482 | 4.7        | 3.2    | 0.9    | 1.4    | -0.5 | -1.7   | 0.5  | 1.7 |
| XLOC_013747 | 16.7       | 11.0   | 4.2    | 4.2    | -0.5 | -1.3   | -0.1 | 1.9 |
| XLOC_005811 | 73.1       | 46.4   | 26.2   | 25.2   | -0.6 | -0.8   | -0.1 | 1.5 |
| XLOC_012527 | 107.4      | 59.2   | 34.2   | 30.1   | -0.8 | -0.7   | -0.3 | 1.8 |
| XLOC_002529 | 447.5      | 184.4  | 53.3   | 35.6   | -1.2 | -1.7   | -0.7 | 3.6 |
| XLOC_005346 | 46.8       | 26.5   | 16.1   | 16.0   | -0.7 | -0.7   | -0.1 | 1.5 |
| XLOC_003989 | 9.1        | 4.8    | 3.4    | 4.1    | -0.8 | -0.4   | 0.2  | 1.1 |
| XLOC_010306 | 10.2       | 5.3    | 3.4    | 3.7    | -0.9 | -0.6   | 0.1  | 1.4 |
| XLOC_011510 | 5.7        | 2.8    | 2.3    | 2.7    | -1.0 | -0.2   | 0.1  | 1.0 |
| XLOC_022177 | 14.8       | 7.0    | 6.3    | 7.9    | -1.0 | -0.1   | 0.3  | 0.8 |
| XLOC_015916 | 6.3        | 3.0    | 2.4    | 3.3    | -1.0 | -0.2   | 0.4  | 0.9 |
| XLOC_023428 | 5.6        | 2.7    | 1.3    | 1.4    | -1.0 | -1.0   | 0.1  | 1.9 |
| XLOC_022554 | 316.6      | 148.3  | 112.3  | 161.8  | -1.0 | -0.3   | 0.5  | 0.9 |
| XLOC_026656 | 15.6       | 7.4    | 5.1    | 6.7    | -1.0 | -0.5   | 0.3  | 1.2 |
| XLOC_017402 | 171.8      | 79.5   | 56.3   | 74.3   | -1.0 | -0.4   | 0.3  | 1.2 |
| XLOC_005823 | 33.1       | 15.4   | 14.1   | 18.2   | -1.1 | -0.1   | 0.3  | 0.8 |
| XLOC_026197 | 18.0       | 8.2    | 8.0    | 8.2    | -1.1 | 0.0    | 0.0  | 1.1 |
| XLOC_004799 | 14.0       | 6.2    | 5.6    | 8.2    | -1.1 | -0.1   | 0.5  | 0.7 |
| XLOC_004507 | 34.7       | 15.5   | 10.6   | 12.0   | -1.1 | -0.5   | 0.1  | 1.5 |
| XLOC_027073 | 3.5        | 1.6    | 1.5    | 1.6    | -1.1 | 0.0    | 0.0  | 1.1 |
| XLOC_013915 | 25.2       | 11.2   | 6.2    | 7.3    | -1.1 | -0.8   | 0.2  | 1.7 |
| XLOC_015381 | 5.8        | 2.6    | 2.2    | 3.1    | -1.1 | -0.1   | 0.4  | 0.8 |
| XLOC_001682 | 4487.<br>2 | 2016.3 | 2174.7 | 1769.4 | -1.1 | 0.2    | -0.4 | 1.3 |
| XLOC_024339 | 72.5       | 31.7   | 22.8   | 23.1   | -1.1 | -0.4   | -0.1 | 1.6 |
| XLOC_017646 | 5.1        | 2.2    | 1.8    | 2.3    | -1.2 | -0.2   | 0.3  | 1.1 |
| XLOC_005875 | 1.8        | 0.8    | 0.8    | 0.8    | -1.2 | 0.2    | -0.2 | 1.2 |
| XLOC_006823 | 32.8       | 13.8   | 9.5    | 13.6   | -1.2 | -0.5   | 0.4  | 1.2 |
| XLOC_007548 | 620.2      | 260.0  | 234.1  | 226.3  | -1.2 | -0.1   | -0.1 | 1.4 |
| XLOC_023556 | 3.6        | 1.5    | 1.8    | 1.4    | -1.2 | 0.4    | -0.4 | 1.3 |
| XLOC_006135 | 5.8        | 2.4    | 2.7    | 3.4    | -1.2 | 0.3    | 0.2  | 0.7 |
| XLOC_024699 | 58.6       | 23.6   | 16.9   | 20.3   | -1.2 | -0.4   | 0.2  | 1.5 |
| XLOC_025590 | 4.2        | 1.7    | 1.7    | 1.5    | -1.3 | 0.1    | -0.3 | 1.5 |

---

|             |      |       |       |       |      |      |      |      |
|-------------|------|-------|-------|-------|------|------|------|------|
| XLOC_025407 | 15.6 | 6.2   | 5.0   | 6.2   | -1.3 | -0.2 | 0.2  | 1.3  |
| XLOC_021605 | 5.0  | 1.9   | 2.0   | 2.9   | -1.3 | 0.1  | 0.4  | 0.7  |
| XLOC_008935 | 22.0 | 8.5   | 5.9   | 7.2   | -1.3 | -0.5 | 0.2  | 1.6  |
| XLOC_027171 | 4.8  | 1.9   | 1.6   | 2.4   | -1.3 | -0.2 | 0.5  | 1.0  |
| XLOC_001718 | 92.6 | 34.2  | 36.6  | 49.3  | -1.4 | 0.2  | 0.4  | 0.9  |
| XLOC_027068 | 6.6  | 2.4   | 1.4   | 2.6   | -1.4 | -0.8 | 0.8  | 1.3  |
| XLOC_026279 | 81.9 | 29.4  | 20.5  | 33.8  | -1.4 | -0.5 | 0.7  | 1.2  |
| XLOC_006907 | 5.9  | 2.0   | 1.8   | 1.6   | -1.5 | -0.1 | -0.3 | 1.8  |
| XLOC_015348 | 7.9  | 2.6   | 1.6   | 2.3   | -1.5 | -0.7 | 0.5  | 1.8  |
| XLOC_000238 | 2.5  | 0.8   | 0.4   | 0.5   | -1.6 | -0.8 | 0.1  | 2.2  |
| XLOC_002542 | 7.0  | 2.3   | 1.9   | 2.9   | -1.6 | -0.2 | 0.6  | 1.2  |
| XLOC_012108 | 8.0  | 2.0   | 3.7   | 3.5   | -1.9 | 0.9  | -0.2 | 1.1  |
| XLOC_003624 | 2.5  | 0.7   | 0.6   | 0.6   | -1.9 | -0.2 | 0.0  | 2.0  |
| XLOC_002458 | 3.1  | 0.8   | 0.6   | 0.7   | -2.0 | -0.4 | 0.2  | 2.1  |
| XLOC_012193 | 6.6  | 1.4   | 0.7   | 0.4   | -2.2 | -0.9 | -0.9 | 4.0  |
| XLOC_016648 | 36.4 | 2.0   | 1.3   | 0.6   | -4.1 | -0.6 | -1.1 | 5.8  |
| XLOC_006485 | 7.6  | 5.1   | 2.8   | 3.4   | -0.5 | -0.8 | 0.2  | 1.1  |
| XLOC_011370 | 5.2  | 3.3   | 1.4   | 2.2   | -0.6 | -1.2 | 0.6  | 1.2  |
| XLOC_014459 | 10.2 | 6.3   | 3.7   | 4.6   | -0.6 | -0.7 | 0.2  | 1.1  |
| XLOC_018058 | 3.6  | 2.1   | 1.4   | 1.4   | -0.7 | -0.6 | -0.1 | 1.3  |
| XLOC_027103 | 2.5  | 1.4   | 1.1   | 1.2   | -0.7 | -0.2 | 0.0  | 1.0  |
| XLOC_027607 | 2.2  | 1.2   | 0.7   | 0.7   | -0.8 | -0.8 | -0.1 | 1.7  |
| XLOC_019042 | 2.2  | 1.2   | 0.9   | 0.9   | -0.8 | -0.4 | 0.0  | 1.3  |
| XLOC_000452 | 3.2  | 1.6   | 0.8   | 1.0   | -0.9 | -0.9 | 0.2  | 1.6  |
| XLOC_018099 | 4.8  | 2.4   | 1.2   | 2.1   | -1.0 | -0.9 | 0.7  | 1.2  |
| XLOC_008623 | 7.9  | 3.8   | 4.0   | 3.0   | -1.0 | 0.1  | -0.4 | 1.3  |
| XLOC_006421 | 51.3 | 20.1  | 19.3  | 17.3  | -1.3 | 0.0  | -0.2 | 1.5  |
| XLOC_015857 | 3.6  | 1.3   | 1.7   | 1.3   | -1.5 | 0.5  | -0.5 | 1.5  |
| XLOC_026362 | 9.1  | 5.1   | 0.6   | 2.9   | -0.8 | -3.0 | 2.2  | 1.6  |
| XLOC_023526 | 8.1  | 13.1  | 11.6  | 15.7  | 0.8  | -0.1 | 0.4  | -1.0 |
| XLOC_006982 | 0.6  | 1.1   | 0.8   | 1.6   | 0.8  | -0.4 | 0.9  | -1.4 |
| XLOC_019730 | 5.5  | 8.6   | 6.7   | 11.8  | 0.7  | -0.3 | 0.7  | -1.2 |
| XLOC_025705 | 1.1  | 1.7   | 2.5   | 3.7   | 0.7  | 0.6  | 0.5  | -1.8 |
| XLOC_005869 | 1.6  | 2.3   | 2.1   | 3.6   | 0.6  | -0.1 | 0.7  | -1.2 |
| XLOC_004689 | 0.9  | 1.2   | 1.2   | 2.6   | 0.5  | 0.1  | 1.1  | -1.7 |
| XLOC_003632 | 1.4  | 1.9   | 2.5   | 3.2   | 0.5  | 0.4  | 0.3  | -1.2 |
| XLOC_003117 | 3.0  | 4.9   | 4.4   | 7.2   | 0.5  | -0.1 | 0.7  | -1.0 |
| XLOC_023964 | 99.2 | 126.2 | 150.2 | 193.0 | 0.4  | 0.3  | 0.3  | -1.0 |
| XLOC_002748 | 6.2  | 7.7   | 8.9   | 12.4  | 0.4  | 0.3  | 0.4  | -1.1 |
| XLOC_021026 | 0.8  | 1.0   | 2.2   | 2.3   | 0.4  | 1.2  | 0.0  | -1.5 |
| XLOC_011387 | 4.0  | 5.0   | 6.0   | 8.6   | 0.4  | 0.3  | 0.4  | -1.1 |
| XLOC_001412 | 2.1  | 2.4   | 3.7   | 4.3   | 0.3  | 0.7  | 0.1  | -1.1 |
| XLOC_021125 | 1.1  | 1.3   | 3.9   | 4.7   | 0.3  | 1.7  | 0.2  | -2.2 |
| XLOC_013165 | 0.8  | 0.9   | 1.7   | 3.2   | 0.3  | 1.0  | 0.8  | -2.1 |

---

---

|             |       |       |       |       |      |      |      |      |
|-------------|-------|-------|-------|-------|------|------|------|------|
| XLOC_012924 | 22.0  | 24.2  | 50.1  | 67.0  | 0.2  | 1.1  | 0.3  | -1.7 |
| XLOC_017008 | 1.6   | 1.7   | 3.1   | 5.6   | 0.2  | 0.9  | 0.8  | -1.9 |
| XLOC_009764 | 0.9   | 0.9   | 2.1   | 2.3   | 0.1  | 1.3  | 0.1  | -1.5 |
| XLOC_006468 | 2.6   | 2.7   | 5.4   | 8.1   | 0.1  | 1.0  | 0.5  | -1.7 |
| XLOC_006428 | 0.4   | 0.4   | 1.1   | 2.3   | 0.0  | 1.5  | 1.0  | -2.4 |
| XLOC_014497 | 3.8   | 3.6   | 6.1   | 9.2   | 0.0  | 0.8  | 0.5  | -1.3 |
| XLOC_024479 | 15.9  | 14.8  | 22.6  | 42.3  | 0.0  | 0.7  | 0.8  | -1.5 |
| XLOC_009414 | 14.6  | 12.9  | 22.5  | 32.3  | -0.1 | 0.9  | 0.5  | -1.2 |
| XLOC_010311 | 0.8   | 0.6   | 1.2   | 2.4   | -0.2 | 0.9  | 1.0  | -1.7 |
| XLOC_004811 | 94.4  | 78.4  | 123.5 | 204.3 | -0.2 | 0.7  | 0.7  | -1.2 |
| XLOC_015354 | 4.5   | 3.7   | 5.4   | 9.3   | -0.2 | 0.6  | 0.7  | -1.1 |
| XLOC_025779 | 14.0  | 11.6  | 19.0  | 32.9  | -0.2 | 0.8  | 0.7  | -1.3 |
| XLOC_010748 | 1.6   | 1.2   | 2.3   | 3.3   | -0.2 | 0.9  | 0.5  | -1.2 |
| XLOC_004057 | 3.6   | 2.9   | 4.5   | 7.1   | -0.2 | 0.7  | 0.6  | -1.0 |
| XLOC_011159 | 2.0   | 1.6   | 3.3   | 6.4   | -0.3 | 1.1  | 0.9  | -1.7 |
| XLOC_002746 | 1.0   | 0.8   | 2.5   | 6.2   | -0.3 | 1.7  | 1.2  | -2.7 |
| XLOC_017943 | 2.9   | 2.3   | 3.3   | 6.5   | -0.3 | 0.5  | 0.9  | -1.2 |
| XLOC_009010 | 0.9   | 0.7   | 1.1   | 2.1   | -0.3 | 0.7  | 0.8  | -1.2 |
| XLOC_000584 | 1.5   | 1.2   | 2.3   | 4.0   | -0.3 | 1.0  | 0.7  | -1.4 |
| XLOC_001083 | 27.0  | 19.9  | 32.1  | 57.0  | -0.4 | 0.7  | 0.8  | -1.1 |
| XLOC_023855 | 0.4   | 0.3   | 0.7   | 7.6   | -0.4 | 1.5  | 3.4  | -4.4 |
| XLOC_001384 | 1.3   | 0.9   | 2.3   | 3.2   | -0.5 | 1.4  | 0.4  | -1.4 |
| XLOC_009724 | 0.8   | 0.5   | 1.0   | 1.7   | -0.5 | 1.0  | 0.7  | -1.2 |
| XLOC_003013 | 1.2   | 0.7   | 1.9   | 3.1   | -0.6 | 1.5  | 0.6  | -1.5 |
| XLOC_011944 | 0.8   | 0.3   | 1.1   | 2.6   | -1.2 | 1.8  | 1.2  | -1.8 |
| XLOC_004557 | 0.8   | 0.2   | 1.6   | 11.9  | -2.0 | 3.1  | 2.8  | -3.9 |
| XLOC_025723 | 45.9  | 27.1  | 15.3  | 20.1  | -0.7 | -0.8 | 0.3  | 1.1  |
| XLOC_024362 | 73.6  | 39.4  | 19.8  | 24.0  | -0.8 | -0.9 | 0.2  | 1.6  |
| XLOC_009330 | 25.2  | 13.0  | 7.0   | 8.5   | -0.9 | -0.8 | 0.2  | 1.5  |
| XLOC_018458 | 44.5  | 22.4  | 13.7  | 18.5  | -0.9 | -0.6 | 0.4  | 1.2  |
| XLOC_011495 | 60.3  | 27.3  | 14.9  | 14.7  | -1.1 | -0.8 | -0.1 | 2.0  |
| XLOC_027620 | 6.4   | 2.8   | 1.2   | 1.2   | -1.1 | -1.2 | 0.0  | 2.4  |
| XLOC_020736 | 37.7  | 15.8  | 7.8   | 9.2   | -1.2 | -1.0 | 0.2  | 2.0  |
| XLOC_012546 | 37.3  | 15.3  | 6.1   | 7.6   | -1.2 | -1.3 | 0.3  | 2.2  |
| XLOC_014310 | 2.3   | 0.9   | 0.4   | 0.6   | -1.3 | -1.2 | 0.6  | 1.9  |
| XLOC_007584 | 214.7 | 79.8  | 37.8  | 43.3  | -1.4 | -1.0 | 0.1  | 2.2  |
| XLOC_003096 | 73.8  | 88.4  | 34.6  | 44.8  | 0.3  | -1.3 | 0.3  | 0.7  |
| XLOC_018690 | 173.2 | 189.5 | 64.1  | 87.7  | 0.2  | -1.5 | 0.4  | 0.9  |
| XLOC_027668 | 8.7   | 10.8  | 25.4  | 26.6  | 0.3  | 1.3  | 0.0  | -1.6 |
| XLOC_021515 | 40.4  | 46.8  | 226.3 | 206.0 | 0.3  | 2.3  | -0.2 | -2.4 |
| XLOC_021158 | 22.8  | 26.4  | 83.5  | 77.5  | 0.3  | 1.7  | -0.2 | -1.8 |
| XLOC_009735 | 5.3   | 6.0   | 11.6  | 12.4  | 0.2  | 1.0  | 0.0  | -1.3 |
| XLOC_009918 | 0.9   | 1.0   | 4.1   | 3.9   | 0.1  | 2.1  | -0.1 | -2.1 |
| XLOC_001891 | 27.7  | 28.4  | 48.3  | 58.7  | 0.1  | 0.8  | 0.2  | -1.1 |

---



|             |            |        |         |        |      |      |      |        |
|-------------|------------|--------|---------|--------|------|------|------|--------|
| XLOC_008339 | 23.4       | 23.8   | 58.4    | 93.1   | 0.1  | 1.4  | 0.6  | -2.0   |
| XLOC_001823 | 250.7      | 252.4  | 436.3   | 534.4  | 0.1  | 0.8  | 0.2  | -1.1   |
| XLOC_001173 | 0.0        | 0.0    | 2.1     | 2.3    | 0.0  | inf  | 0.1  | #NAME? |
| XLOC_026867 | 61.4       | 56.5   | 150.6   | 210.2  | -0.1 | 1.5  | 0.4  | -1.8   |
| XLOC_019765 | 8.7        | 7.6    | 407.3   | 420.0  | -0.1 | 5.8  | 0.0  | -5.6   |
| XLOC_024358 | 15.0       | 13.1   | 40.6    | 41.5   | -0.1 | 1.7  | 0.0  | -1.5   |
| XLOC_016495 | 41.7       | 35.6   | 63.6    | 88.7   | -0.2 | 0.9  | 0.4  | -1.1   |
| XLOC_025759 | 0.9        | 0.8    | 1.9     | 2.2    | -0.2 | 1.3  | 0.2  | -1.3   |
| XLOC_010117 | 10.3       | 8.4    | 18.5    | 32.6   | -0.2 | 1.2  | 0.8  | -1.7   |
| XLOC_010796 | 8.1        | 6.6    | 13.7    | 18.0   | -0.2 | 1.1  | 0.3  | -1.2   |
| XLOC_025143 | 2.5        | 1.8    | 4.7     | 8.1    | -0.5 | 1.5  | 0.7  | -1.7   |
| XLOC_006705 | 0.3        | 0.1    | 2.7     | 3.2    | -1.6 | 4.8  | 0.2  | -3.3   |
| XLOC_008982 | 9.9        | 16.4   | 12.6    | 3.1    | 0.8  | -0.3 | -2.1 | 1.6    |
| XLOC_002579 | 61.2       | 92.3   | 83.8    | 36.1   | 0.7  | -0.1 | -1.3 | 0.7    |
| XLOC_016984 | 3.7        | 6.4    | 5.1     | 0.9    | 0.9  | -0.3 | -2.5 | 1.9    |
| XLOC_008642 | 7.3        | 10.3   | 6.7     | 3.1    | 0.6  | -0.6 | -1.2 | 1.2    |
| XLOC_020787 | 5.7        | 8.0    | 6.4     | 2.1    | 0.6  | -0.3 | -1.7 | 1.4    |
| XLOC_005861 | 3.8        | 5.3    | 3.7     | 1.5    | 0.5  | -0.5 | -1.4 | 1.3    |
| XLOC_020861 | 6.6        | 8.9    | 6.6     | 3.4    | 0.5  | -0.4 | -1.0 | 0.9    |
| XLOC_003822 | 7.2        | 9.6    | 7.1     | 3.2    | 0.5  | -0.4 | -1.2 | 1.1    |
| XLOC_003249 | 7.1        | 9.2    | 7.4     | 3.4    | 0.4  | -0.3 | -1.2 | 1.0    |
| XLOC_010411 | 2.2        | 2.8    | 2.7     | 1.0    | 0.4  | 0.0  | -1.5 | 1.0    |
| XLOC_006011 | 31.5       | 39.5   | 29.6    | 12.2   | 0.4  | -0.4 | -1.3 | 1.3    |
| XLOC_016237 | 1.8        | 2.2    | 1.6     | 0.6    | 0.4  | -0.4 | -1.5 | 1.4    |
| XLOC_005282 | 2.4        | 2.9    | 2.5     | 1.0    | 0.4  | -0.2 | -1.3 | 1.2    |
| XLOC_026725 | 5.8        | 7.0    | 5.2     | 2.1    | 0.3  | -0.4 | -1.3 | 1.4    |
| XLOC_024145 | 8.9        | 10.7   | 9.0     | 4.2    | 0.3  | -0.2 | -1.2 | 1.0    |
| XLOC_022147 | 3.6        | 4.3    | 3.5     | 1.8    | 0.3  | -0.2 | -1.0 | 0.9    |
| XLOC_019527 | 134.8      | 162.0  | 169.2   | 87.7   | 0.3  | 0.1  | -1.0 | 0.6    |
| XLOC_020806 | 15.2       | 18.0   | 14.1    | 6.5    | 0.3  | -0.3 | -1.2 | 1.2    |
| XLOC_016182 | 4.4        | 5.1    | 4.5     | 2.3    | 0.3  | -0.1 | -1.0 | 0.9    |
| XLOC_003195 | 23.7       | 27.2   | 24.0    | 12.5   | 0.3  | -0.1 | -1.0 | 0.9    |
| XLOC_016853 | 9.9        | 11.4   | 10.3    | 4.9    | 0.3  | -0.1 | -1.1 | 1.0    |
| XLOC_026261 | 4.4        | 4.9    | 4.9     | 2.4    | 0.2  | 0.1  | -1.1 | 0.8    |
| XLOC_018521 | 3.3        | 3.6    | 4.4     | 1.1    | 0.2  | 0.3  | -2.1 | 1.5    |
| XLOC_012302 | 3.2        | 3.5    | 3.3     | 1.5    | 0.2  | 0.0  | -1.2 | 1.1    |
| XLOC_010403 | 9898.<br>2 | 9959.5 | 10559.9 | 4335.6 | 0.1  | 0.1  | -1.4 | 1.1    |
| XLOC_017926 | 6.3        | 6.1    | 5.8     | 2.9    | 0.0  | 0.0  | -1.1 | 1.1    |
| XLOC_022410 | 1040.<br>9 | 1001.2 | 1319.7  | 545.7  | 0.0  | 0.5  | -1.3 | 0.9    |
| XLOC_007187 | 19.0       | 8.5    | 4.9     | 8.7    | -1.1 | -0.7 | 0.8  | 1.1    |
| XLOC_002130 | 12.9       | 5.6    | 4.2     | 7.1    | -1.1 | -0.3 | 0.7  | 0.8    |
| XLOC_022091 | 12.5       | 5.1    | 2.8     | 5.8    | -1.2 | -0.8 | 1.0  | 1.0    |

---

|             |       |       |       |       |      |      |     |        |
|-------------|-------|-------|-------|-------|------|------|-----|--------|
| XLOC_018051 | 71.0  | 28.0  | 21.1  | 34.9  | -1.3 | -0.3 | 0.7 | 1.0    |
| XLOC_025694 | 13.6  | 5.3   | 4.4   | 8.4   | -1.3 | -0.2 | 0.9 | 0.6    |
| XLOC_015940 | 10.3  | 4.0   | 3.2   | 6.1   | -1.3 | -0.3 | 0.9 | 0.7    |
| XLOC_013034 | 274.5 | 122.6 | 50.3  | 118.9 | -1.1 | -1.2 | 1.2 | 1.2    |
| XLOC_022889 | 0.9   | 1.5   | 0.9   | 5.1   | 0.8  | -0.6 | 2.4 | -2.6   |
| XLOC_020222 | 1.3   | 2.0   | 1.6   | 3.2   | 0.7  | -0.3 | 0.9 | -1.3   |
| XLOC_023521 | 2.8   | 4.3   | 3.2   | 8.4   | 0.7  | -0.3 | 1.3 | -1.7   |
| XLOC_016203 | 1.3   | 2.0   | 1.0   | 4.0   | 0.7  | -0.9 | 1.9 | -1.7   |
| XLOC_012627 | 2.2   | 3.2   | 2.0   | 6.8   | 0.6  | -0.6 | 1.7 | -1.7   |
| XLOC_005709 | 3.1   | 4.5   | 3.7   | 6.7   | 0.6  | -0.2 | 0.8 | -1.2   |
| XLOC_002627 | 11.6  | 16.4  | 14.2  | 23.1  | 0.6  | -0.2 | 0.6 | -1.1   |
| XLOC_018775 | 3.0   | 4.1   | 3.3   | 6.2   | 0.5  | -0.2 | 0.8 | -1.1   |
| XLOC_017379 | 3.2   | 4.3   | 3.5   | 6.8   | 0.5  | -0.2 | 0.9 | -1.1   |
| XLOC_025342 | 14.2  | 18.8  | 28.4  | 50.1  | 0.5  | 0.7  | 0.8 | -1.9   |
| XLOC_002079 | 327.5 | 435.7 | 442.1 | 680.4 | 0.5  | 0.1  | 0.6 | -1.1   |
| XLOC_000752 | 3.9   | 5.0   | 8.1   | 17.0  | 0.4  | 0.8  | 1.0 | -2.2   |
| XLOC_005834 | 2.4   | 3.0   | 2.9   | 6.1   | 0.3  | 0.0  | 1.0 | -1.4   |
| XLOC_021434 | 11.1  | 13.4  | 14.0  | 32.1  | 0.3  | 0.1  | 1.1 | -1.6   |
| XLOC_011020 | 0.8   | 0.8   | 0.8   | 2.5   | 0.2  | 0.0  | 1.5 | -1.7   |
| XLOC_024154 | 9.6   | 10.3  | 9.8   | 20.5  | 0.2  | 0.0  | 1.0 | -1.2   |
| XLOC_025302 | 6.8   | 7.3   | 7.9   | 14.4  | 0.2  | 0.2  | 0.8 | -1.1   |
| XLOC_017409 | 2.7   | 2.9   | 3.7   | 6.7   | 0.1  | 0.4  | 0.8 | -1.4   |
| XLOC_026700 | 3.2   | 3.3   | 4.7   | 7.8   | 0.1  | 0.6  | 0.7 | -1.3   |
| XLOC_015401 | 1.1   | 1.1   | 1.4   | 2.8   | 0.1  | 0.4  | 0.9 | -1.4   |
| XLOC_012623 | 1.2   | 1.2   | 1.4   | 2.9   | 0.1  | 0.2  | 1.0 | -1.3   |
| XLOC_016258 | 1.2   | 1.2   | 1.5   | 3.3   | 0.1  | 0.4  | 1.0 | -1.5   |
| XLOC_004967 | 0.4   | 0.4   | 0.7   | 3.4   | 0.0  | 0.9  | 2.2 | -3.1   |
| XLOC_012057 | 6.1   | 6.0   | 7.9   | 12.9  | 0.0  | 0.5  | 0.6 | -1.1   |
| XLOC_019435 | 2.7   | 2.6   | 2.7   | 6.4   | 0.0  | 0.1  | 1.2 | -1.3   |
| XLOC_019593 | 3.5   | 3.3   | 3.3   | 7.3   | 0.0  | 0.1  | 1.1 | -1.1   |
| XLOC_009037 | 3.6   | 3.4   | 4.6   | 9.9   | 0.0  | 0.5  | 1.0 | -1.5   |
| XLOC_001853 | 0.0   | 0.0   | 0.0   | 85.7  | 0.0  | 0.0  | inf | #NAME? |
| XLOC_000743 | 64.7  | 61.7  | 67.7  | 154.8 | 0.0  | 0.2  | 1.1 | -1.3   |
| XLOC_012851 | 1.1   | 1.0   | 1.1   | 2.9   | 0.0  | 0.2  | 1.3 | -1.5   |
| XLOC_011654 | 3.9   | 3.7   | 4.3   | 11.4  | 0.0  | 0.3  | 1.3 | -1.6   |
| XLOC_002780 | 4.3   | 4.0   | 4.4   | 10.6  | 0.0  | 0.2  | 1.2 | -1.4   |
| XLOC_014383 | 6.6   | 5.9   | 6.9   | 13.2  | -0.1 | 0.3  | 0.9 | -1.0   |
| XLOC_002282 | 12.3  | 10.9  | 13.2  | 26.7  | -0.1 | 0.3  | 1.0 | -1.2   |
| XLOC_000565 | 17.1  | 15.0  | 19.0  | 35.3  | -0.1 | 0.4  | 0.8 | -1.1   |
| XLOC_009608 | 4.1   | 3.5   | 5.1   | 8.5   | -0.2 | 0.6  | 0.7 | -1.1   |
| XLOC_021564 | 1.1   | 0.9   | 1.2   | 3.0   | -0.2 | 0.4  | 1.3 | -1.4   |
| XLOC_016721 | 1.1   | 0.9   | 1.5   | 3.8   | -0.2 | 0.7  | 1.3 | -1.8   |
| XLOC_016900 | 2.3   | 1.9   | 2.4   | 7.1   | -0.2 | 0.4  | 1.5 | -1.7   |
| XLOC_013901 | 1.6   | 1.3   | 1.6   | 3.4   | -0.2 | 0.4  | 1.0 | -1.2   |

---

---

|             |       |       |       |       |      |      |      |      |
|-------------|-------|-------|-------|-------|------|------|------|------|
| XLOC_024385 | 4.1   | 3.2   | 5.3   | 8.5   | -0.3 | 0.8  | 0.6  | -1.1 |
| XLOC_014843 | 0.6   | 0.5   | 1.0   | 2.1   | -0.3 | 1.1  | 1.1  | -1.8 |
| XLOC_021754 | 6.5   | 5.0   | 6.5   | 12.6  | -0.3 | 0.4  | 0.9  | -1.0 |
| XLOC_008758 | 2.1   | 1.6   | 2.8   | 6.9   | -0.3 | 0.8  | 1.2  | -1.7 |
| XLOC_001662 | 46.0  | 35.4  | 45.4  | 102.2 | -0.3 | 0.4  | 1.1  | -1.2 |
| XLOC_002097 | 1.7   | 1.3   | 1.9   | 4.0   | -0.4 | 0.6  | 1.0  | -1.3 |
| XLOC_026970 | 1.4   | 1.0   | 1.4   | 3.6   | -0.4 | 0.5  | 1.3  | -1.4 |
| XLOC_008740 | 1.4   | 1.0   | 1.5   | 4.0   | -0.4 | 0.6  | 1.3  | -1.5 |
| XLOC_020288 | 10.5  | 7.6   | 11.0  | 21.6  | -0.4 | 0.6  | 0.9  | -1.1 |
| XLOC_021819 | 0.8   | 0.6   | 1.0   | 2.6   | -0.4 | 0.9  | 1.3  | -1.8 |
| XLOC_005464 | 14.5  | 10.2  | 14.8  | 31.2  | -0.4 | 0.6  | 1.0  | -1.2 |
| XLOC_024007 | 9.6   | 6.8   | 8.7   | 19.7  | -0.4 | 0.4  | 1.1  | -1.1 |
| XLOC_001762 | 3.6   | 2.5   | 4.5   | 10.9  | -0.5 | 0.9  | 1.2  | -1.6 |
| XLOC_020497 | 11.3  | 7.4   | 11.1  | 22.1  | -0.5 | 0.6  | 0.9  | -1.0 |
| XLOC_016783 | 2.3   | 1.5   | 2.0   | 4.6   | -0.5 | 0.5  | 1.1  | -1.1 |
| XLOC_011021 | 1.0   | 0.6   | 1.0   | 3.3   | -0.6 | 0.6  | 1.7  | -1.7 |
| XLOC_003741 | 1.8   | 1.1   | 1.7   | 3.9   | -0.7 | 0.7  | 1.1  | -1.2 |
| XLOC_005955 | 1.3   | 0.7   | 1.1   | 3.7   | -0.8 | 0.8  | 1.6  | -1.6 |
| XLOC_023493 | 0.7   | 0.3   | 0.9   | 8.5   | -1.0 | 1.5  | 3.2  | -3.7 |
| XLOC_005957 | 0.3   | 0.0   | 0.4   | 4.3   | -4.0 | 4.6  | 3.3  | -3.8 |
| XLOC_018152 | 74.7  | 46.5  | 22.1  | 32.4  | -0.6 | -1.0 | 0.5  | 1.2  |
| XLOC_003796 | 21.0  | 10.9  | 6.7   | 9.6   | -0.9 | -0.6 | 0.5  | 1.1  |
| XLOC_002555 | 222.5 | 114.8 | 60.7  | 91.4  | -0.9 | -0.9 | 0.5  | 1.2  |
| XLOC_017363 | 149.1 | 75.8  | 27.1  | 43.2  | -0.9 | -1.4 | 0.6  | 1.7  |
| XLOC_024024 | 33.5  | 14.1  | 6.6   | 9.8   | -1.2 | -1.0 | 0.5  | 1.7  |
| XLOC_022650 | 10.2  | 12.9  | 4.2   | 20.6  | 0.4  | -1.6 | 2.2  | -1.1 |
| XLOC_009000 | 13.0  | 11.0  | 2.6   | 5.9   | -0.2 | -2.0 | 1.1  | 1.1  |
| XLOC_009963 | 7.2   | 5.1   | 1.1   | 2.5   | -0.4 | -2.2 | 1.1  | 1.5  |
| XLOC_024528 | 67.4  | 46.3  | 19.8  | 42.9  | -0.5 | -1.2 | 1.0  | 0.6  |
| XLOC_024641 | 68.2  | 79.4  | 131.7 | 226.8 | 0.3  | 0.8  | 0.7  | -1.8 |
| XLOC_006017 | 1.8   | 2.1   | 4.0   | 9.4   | 0.3  | 1.0  | 1.2  | -2.4 |
| XLOC_000742 | 38.1  | 39.4  | 72.5  | 110.8 | 0.1  | 0.9  | 0.5  | -1.6 |
| XLOC_014020 | 0.8   | 0.8   | 1.8   | 3.6   | 0.1  | 1.3  | 0.9  | -2.3 |
| XLOC_006500 | 129.6 | 122.7 | 235.7 | 398.4 | 0.0  | 1.0  | 0.7  | -1.7 |
| XLOC_009067 | 19.5  | 18.1  | 28.7  | 46.0  | 0.0  | 0.7  | 0.6  | -1.3 |
| XLOC_020618 | 23.3  | 21.1  | 42.9  | 92.6  | -0.1 | 1.1  | 1.0  | -2.0 |
| XLOC_012629 | 3.6   | 3.1   | 8.7   | 18.4  | -0.2 | 1.5  | 1.0  | -2.4 |
| XLOC_016234 | 2.6   | 2.0   | 3.2   | 5.2   | -0.3 | 0.7  | 0.6  | -1.0 |
| XLOC_000292 | 3.8   | 2.9   | 5.2   | 10.4  | -0.3 | 0.9  | 0.9  | -1.5 |
| XLOC_017378 | 49.7  | 36.8  | 55.8  | 143.6 | -0.4 | 0.7  | 1.3  | -1.6 |
| XLOC_017295 | 30.8  | 21.5  | 33.5  | 62.4  | -0.5 | 0.7  | 0.8  | -1.1 |
| XLOC_023168 | 8.6   | 5.6   | 9.9   | 17.1  | -0.6 | 0.9  | 0.7  | -1.0 |
| XLOC_025013 | 1.6   | 1.0   | 2.2   | 4.5   | -0.7 | 1.3  | 0.9  | -1.5 |
| XLOC_001801 | 0.5   | 2.5   | 1.9   | 0.8   | 2.5  | -0.3 | -1.3 | -0.9 |

---

|             |            |         |        |        |      |      |      |      |
|-------------|------------|---------|--------|--------|------|------|------|------|
| XLOC_012451 | 1.2        | 5.8     | 3.8    | 2.2    | 2.3  | -0.6 | -0.9 | -0.9 |
| XLOC_007185 | 0.6        | 2.4     | 1.1    | 1.3    | 2.1  | -1.1 | 0.2  | -1.2 |
| XLOC_020757 | 144.2      | 322.4   | 271.7  | 166.6  | 1.2  | -0.2 | -0.8 | -0.3 |
| XLOC_012996 | 7.8        | 16.7    | 13.7   | 11.5   | 1.2  | -0.2 | -0.3 | -0.6 |
| XLOC_014690 | 3.3        | 6.8     | 5.0    | 3.6    | 1.2  | -0.4 | -0.5 | -0.2 |
| XLOC_013683 | 1.7        | 3.3     | 1.9    | 1.4    | 1.0  | -0.7 | -0.5 | 0.2  |
| XLOC_024114 | 1.7        | 5.2     | 2.2    | 2.8    | 1.7  | -1.2 | 0.3  | -0.8 |
| XLOC_010694 | 4432.<br>7 | 13617.8 | 899.8  | 1369.9 | 1.7  | -3.9 | 0.5  | 1.6  |
| XLOC_026738 | 18.0       | 51.4    | 21.2   | 17.3   | 1.6  | -1.2 | -0.4 | 0.0  |
| XLOC_013064 | 5.0        | 13.4    | 7.6    | 7.2    | 1.5  | -0.8 | -0.2 | -0.6 |
| XLOC_000198 | 431.0      | 1033.8  | 370.6  | 736.7  | 1.3  | -1.4 | 0.9  | -0.8 |
| XLOC_010797 | 44.0       | 102.1   | 54.5   | 38.6   | 1.3  | -0.8 | -0.6 | 0.1  |
| XLOC_010970 | 113.1      | 251.9   | 55.6   | 67.4   | 1.2  | -2.1 | 0.2  | 0.7  |
| XLOC_010974 | 11.6       | 25.3    | 7.7    | 10.3   | 1.2  | -1.7 | 0.3  | 0.1  |
| XLOC_004253 | 32.3       | 70.6    | 44.3   | 35.4   | 1.2  | -0.6 | -0.4 | -0.2 |
| XLOC_019048 | 1.0        | 2.0     | 0.5    | 0.9    | 1.0  | -1.8 | 0.7  | 0.1  |
| XLOC_003826 | 14.2       | 27.3    | 18.1   | 15.9   | 1.0  | -0.5 | -0.3 | -0.2 |
| XLOC_001399 | 59.4       | 105.6   | 24.0   | 31.4   | 0.9  | -2.1 | 0.3  | 0.9  |
| XLOC_000977 | 237.1      | 412.4   | 151.8  | 150.4  | 0.9  | -1.4 | -0.1 | 0.6  |
| XLOC_010051 | 7373.<br>5 | 17815.7 | 3578.9 | 3757.9 | 1.3  | -2.3 | 0.0  | 0.9  |
| XLOC_015944 | 8.6        | 13.5    | 4.9    | 5.2    | 0.7  | -1.4 | 0.0  | 0.7  |
| XLOC_004260 | 17.8       | 23.8    | 11.2   | 12.1   | 0.5  | -1.0 | 0.0  | 0.5  |
| XLOC_020375 | 13.9       | 63.4    | 44.2   | 23.6   | 2.3  | -0.5 | -1.0 | -0.8 |
| XLOC_027099 | 11.3       | 39.9    | 27.5   | 16.2   | 1.9  | -0.5 | -0.8 | -0.6 |
| XLOC_022901 | 1.2        | 4.2     | 2.9    | 1.6    | 1.8  | -0.5 | -0.9 | -0.5 |
| XLOC_021906 | 30.8       | 74.1    | 62.5   | 44.9   | 1.3  | -0.2 | -0.5 | -0.6 |
| XLOC_004897 | 12.3       | 28.5    | 24.6   | 15.6   | 1.3  | -0.2 | -0.7 | -0.4 |
| XLOC_000196 | 209.3      | 447.6   | 374.4  | 258.4  | 1.2  | -0.2 | -0.6 | -0.4 |
| XLOC_019664 | 18.9       | 56.5    | 35.6   | 19.0   | 1.6  | -0.6 | -1.0 | -0.1 |
| XLOC_010882 | 228.4      | 567.6   | 87.0   | 167.1  | 1.4  | -2.6 | 0.9  | 0.4  |
| XLOC_004834 | 129.8      | 264.7   | 152.7  | 114.6  | 1.1  | -0.7 | -0.5 | 0.1  |
| XLOC_022991 | 9.7        | 4.5     | 5.7    | 7.6    | -1.0 | 0.4  | 0.4  | 0.3  |
| XLOC_001188 | 10.1       | 4.7     | 5.3    | 7.4    | -1.1 | 0.2  | 0.4  | 0.4  |
| XLOC_018542 | 14.5       | 6.6     | 8.6    | 11.8   | -1.1 | 0.5  | 0.4  | 0.2  |
| XLOC_002574 | 78.5       | 35.5    | 38.8   | 45.9   | -1.1 | 0.2  | 0.2  | 0.7  |
| XLOC_013122 | 14.0       | 6.3     | 6.9    | 11.4   | -1.1 | 0.2  | 0.7  | 0.2  |
| XLOC_016333 | 6.1        | 2.7     | 3.2    | 4.5    | -1.1 | 0.3  | 0.4  | 0.4  |
| XLOC_000660 | 9.3        | 4.1     | 3.0    | 4.8    | -1.1 | -0.4 | 0.6  | 0.9  |
| XLOC_012781 | 30.7       | 13.1    | 13.1   | 20.0   | -1.2 | 0.1  | 0.5  | 0.6  |
| XLOC_007616 | 75.7       | 32.3    | 37.9   | 51.4   | -1.2 | 0.3  | 0.4  | 0.5  |
| XLOC_020808 | 10.7       | 4.5     | 5.7    | 7.9    | -1.2 | 0.4  | 0.4  | 0.4  |
| XLOC_010746 | 83.1       | 34.5    | 36.7   | 49.5   | -1.2 | 0.1  | 0.4  | 0.7  |

|             |            |         |        |        |      |      |      |      |
|-------------|------------|---------|--------|--------|------|------|------|------|
| XLOC_015876 | 4.4        | 1.8     | 1.3    | 2.2    | -1.2 | -0.4 | 0.6  | 0.9  |
| XLOC_023654 | 16.6       | 6.7     | 8.4    | 10.2   | -1.3 | 0.4  | 0.2  | 0.7  |
| XLOC_003804 | 2.1        | 0.8     | 1.1    | 1.3    | -1.3 | 0.5  | 0.2  | 0.6  |
| XLOC_008842 | 4.3        | 1.7     | 2.4    | 3.5    | -1.3 | 0.5  | 0.5  | 0.2  |
| XLOC_020299 | 8.5        | 3.4     | 4.6    | 6.8    | -1.3 | 0.5  | 0.5  | 0.3  |
| XLOC_023083 | 7.4        | 2.9     | 3.3    | 5.4    | -1.3 | 0.2  | 0.6  | 0.4  |
| XLOC_025734 | 4.3        | 1.7     | 1.8    | 3.3    | -1.3 | 0.2  | 0.8  | 0.3  |
| XLOC_017704 | 3.6        | 1.4     | 1.9    | 2.8    | -1.3 | 0.5  | 0.5  | 0.3  |
| XLOC_021181 | 12.6       | 4.9     | 6.1    | 7.8    | -1.3 | 0.4  | 0.3  | 0.7  |
| XLOC_000656 | 6.6        | 2.5     | 3.3    | 5.0    | -1.3 | 0.4  | 0.6  | 0.4  |
| XLOC_005548 | 3.4        | 1.2     | 1.2    | 1.4    | -1.4 | 0.0  | 0.1  | 1.2  |
| XLOC_005603 | 6.4        | 2.3     | 3.0    | 4.2    | -1.4 | 0.4  | 0.4  | 0.6  |
| XLOC_010745 | 2.4        | 0.9     | 1.3    | 1.5    | -1.4 | 0.7  | 0.2  | 0.6  |
| XLOC_004522 | 7.9        | 2.9     | 2.8    | 4.1    | -1.4 | 0.0  | 0.5  | 0.9  |
| XLOC_004063 | 1.6        | 0.6     | 0.7    | 1.3    | -1.4 | 0.4  | 0.8  | 0.2  |
| XLOC_017734 | 4.9        | 1.7     | 1.7    | 3.7    | -1.5 | 0.0  | 1.1  | 0.4  |
| XLOC_018398 | 12.9       | 4.4     | 6.0    | 7.6    | -1.5 | 0.5  | 0.3  | 0.7  |
| XLOC_009043 | 1.7        | 0.6     | 0.6    | 1.2    | -1.5 | 0.2  | 0.9  | 0.5  |
| XLOC_025350 | 11.5       | 3.6     | 5.3    | 6.3    | -1.6 | 0.6  | 0.2  | 0.8  |
| XLOC_002784 | 3.4        | 1.0     | 1.1    | 1.6    | -1.7 | 0.2  | 0.5  | 1.0  |
| XLOC_002572 | 3.2        | 0.9     | 1.3    | 2.2    | -1.7 | 0.5  | 0.7  | 0.5  |
| XLOC_015512 | 230.8      | 60.2    | 73.2   | 102.3  | -1.9 | 0.3  | 0.4  | 1.1  |
| XLOC_008851 | 6.2        | 1.2     | 1.0    | 2.9    | -2.3 | -0.1 | 1.4  | 1.0  |
| XLOC_001158 | 4216.<br>9 | 10398.2 | 14.8   | 5654.6 | 1.4  | -9.4 | 8.5  | -0.5 |
| XLOC_012847 | 7.0        | 8.9     | 2.3    | 6.0    | 0.4  | -1.9 | 1.3  | 0.2  |
| XLOC_026092 | 35.3       | 44.0    | 19.0   | 24.3   | 0.4  | -1.1 | 0.3  | 0.5  |
| XLOC_005308 | 83.6       | 187.9   | 118.7  | 63.5   | 1.2  | -0.6 | -1.0 | 0.3  |
| XLOC_012707 | 2.4        | 5.1     | 5.0    | 2.7    | 1.2  | 0.0  | -1.0 | -0.2 |
| XLOC_021603 | 29.7       | 61.6    | 41.2   | 22.2   | 1.1  | -0.5 | -1.0 | 0.4  |
| XLOC_010052 | 1018.<br>0 | 2057.2  | 1332.1 | 739.7  | 1.1  | -0.6 | -0.9 | 0.4  |
| XLOC_025669 | 23.1       | 45.9    | 31.6   | 18.6   | 1.1  | -0.5 | -0.8 | 0.2  |
| XLOC_013597 | 7.6        | 14.5    | 11.1   | 6.1    | 1.0  | -0.3 | -0.9 | 0.2  |
| XLOC_018658 | 4.7        | 9.1     | 7.4    | 3.9    | 1.0  | -0.2 | -1.0 | 0.2  |
| XLOC_009468 | 12.9       | 24.5    | 28.0   | 12.5   | 1.0  | 0.3  | -1.2 | 0.0  |
| XLOC_018431 | 3.0        | 5.6     | 5.2    | 2.4    | 1.0  | -0.1 | -1.2 | 0.3  |
| XLOC_015771 | 83.3       | 160.2   | 163.2  | 84.7   | 1.0  | 0.1  | -1.0 | -0.1 |
| XLOC_004337 | 11.1       | 20.9    | 23.2   | 10.2   | 1.0  | 0.2  | -1.3 | 0.1  |
| XLOC_014786 | 3.4        | 6.4     | 6.4    | 2.2    | 1.0  | 0.1  | -1.6 | 0.6  |
| XLOC_020831 | 13.6       | 25.4    | 23.7   | 8.9    | 1.0  | 0.0  | -1.5 | 0.5  |
| XLOC_021631 | 23.7       | 44.7    | 35.8   | 18.6   | 1.0  | -0.3 | -1.0 | 0.3  |
| XLOC_019342 | 15.4       | 28.4    | 26.1   | 10.3   | 1.0  | -0.1 | -1.4 | 0.5  |
| XLOC_024242 | 29.8       | 54.6    | 41.2   | 20.7   | 0.9  | -0.4 | -1.1 | 0.5  |

---

|             |       |       |       |       |     |      |      |      |
|-------------|-------|-------|-------|-------|-----|------|------|------|
| XLOC_014771 | 4.7   | 8.5   | 6.2   | 2.9   | 0.9 | -0.4 | -1.2 | 0.6  |
| XLOC_008175 | 4.1   | 7.4   | 7.0   | 2.8   | 0.9 | 0.0  | -1.4 | 0.5  |
| XLOC_017242 | 2.9   | 5.2   | 4.3   | 1.9   | 0.9 | -0.2 | -1.3 | 0.6  |
| XLOC_004937 | 0.9   | 1.7   | 1.5   | 0.6   | 0.9 | -0.1 | -1.3 | 0.5  |
| XLOC_022038 | 2.9   | 5.1   | 6.2   | 2.6   | 0.9 | 0.3  | -1.4 | 0.1  |
| XLOC_025977 | 6.2   | 11.0  | 9.6   | 4.4   | 0.9 | -0.1 | -1.2 | 0.4  |
| XLOC_013706 | 23.7  | 42.1  | 40.5  | 15.6  | 0.9 | 0.0  | -1.4 | 0.5  |
| XLOC_006367 | 17.3  | 30.4  | 30.7  | 13.1  | 0.9 | 0.1  | -1.3 | 0.3  |
| XLOC_003178 | 6.0   | 10.8  | 12.2  | 5.3   | 0.9 | 0.2  | -1.3 | 0.1  |
| XLOC_007984 | 38.0  | 66.1  | 73.1  | 34.9  | 0.9 | 0.2  | -1.1 | 0.1  |
| XLOC_005313 | 3.7   | 6.4   | 8.3   | 2.5   | 0.9 | 0.4  | -1.8 | 0.5  |
| XLOC_018795 | 56.6  | 98.5  | 98.6  | 50.1  | 0.9 | 0.1  | -1.0 | 0.1  |
| XLOC_014494 | 5.9   | 9.8   | 14.1  | 4.7   | 0.8 | 0.6  | -1.7 | 0.2  |
| XLOC_016468 | 22.6  | 38.7  | 44.6  | 22.6  | 0.8 | 0.3  | -1.0 | -0.1 |
| XLOC_016503 | 7.9   | 13.7  | 15.6  | 5.4   | 0.8 | 0.2  | -1.6 | 0.5  |
| XLOC_025633 | 16.8  | 28.6  | 26.6  | 11.8  | 0.8 | 0.0  | -1.2 | 0.5  |
| XLOC_001166 | 46.4  | 77.1  | 147.2 | 34.9  | 0.8 | 1.0  | -2.1 | 0.3  |
| XLOC_027942 | 113.4 | 189.8 | 190.0 | 90.4  | 0.8 | 0.1  | -1.1 | 0.3  |
| XLOC_007853 | 38.2  | 62.7  | 70.1  | 27.2  | 0.8 | 0.2  | -1.4 | 0.4  |
| XLOC_005260 | 15.7  | 25.7  | 30.4  | 11.9  | 0.8 | 0.3  | -1.4 | 0.3  |
| XLOC_022349 | 29.9  | 49.0  | 53.4  | 26.3  | 0.8 | 0.2  | -1.1 | 0.1  |
| XLOC_026178 | 4.2   | 7.0   | 6.1   | 2.5   | 0.8 | -0.1 | -1.3 | 0.7  |
| XLOC_012392 | 8.4   | 13.7  | 20.2  | 7.8   | 0.8 | 0.6  | -1.4 | 0.1  |
| XLOC_020571 | 10.5  | 17.1  | 17.8  | 7.9   | 0.8 | 0.1  | -1.2 | 0.3  |
| XLOC_014813 | 45.5  | 74.0  | 86.8  | 45.3  | 0.8 | 0.3  | -1.0 | -0.1 |
| XLOC_002849 | 7.5   | 12.2  | 8.8   | 4.2   | 0.8 | -0.4 | -1.1 | 0.8  |
| XLOC_004043 | 41.2  | 65.7  | 68.3  | 31.8  | 0.7 | 0.1  | -1.2 | 0.3  |
| XLOC_003293 | 20.6  | 32.7  | 34.6  | 15.7  | 0.7 | 0.1  | -1.2 | 0.3  |
| XLOC_020053 | 10.3  | 16.3  | 13.3  | 6.9   | 0.7 | -0.2 | -1.0 | 0.5  |
| XLOC_009431 | 34.7  | 54.6  | 52.8  | 27.1  | 0.7 | 0.0  | -1.0 | 0.3  |
| XLOC_009567 | 39.0  | 61.1  | 54.5  | 26.1  | 0.7 | -0.1 | -1.1 | 0.5  |
| XLOC_012349 | 69.5  | 108.6 | 119.6 | 60.6  | 0.7 | 0.2  | -1.1 | 0.2  |
| XLOC_016305 | 46.1  | 70.6  | 59.3  | 30.2  | 0.7 | -0.2 | -1.0 | 0.5  |
| XLOC_013656 | 6.5   | 9.9   | 12.4  | 5.0   | 0.7 | 0.4  | -1.4 | 0.3  |
| XLOC_002261 | 184.8 | 278.4 | 338.8 | 161.6 | 0.7 | 0.3  | -1.1 | 0.1  |
| XLOC_015956 | 41.6  | 61.0  | 79.1  | 36.5  | 0.6 | 0.4  | -1.2 | 0.1  |
| XLOC_026259 | 19.1  | 28.1  | 39.0  | 16.4  | 0.6 | 0.5  | -1.3 | 0.2  |
| XLOC_005259 | 14.6  | 21.4  | 25.8  | 11.9  | 0.6 | 0.3  | -1.2 | 0.2  |
| XLOC_024642 | 35.3  | 50.8  | 50.0  | 26.2  | 0.6 | 0.0  | -1.0 | 0.4  |
| XLOC_022414 | 11.8  | 16.9  | 22.4  | 9.9   | 0.6 | 0.5  | -1.2 | 0.2  |
| XLOC_003196 | 14.2  | 20.3  | 24.8  | 11.2  | 0.6 | 0.3  | -1.2 | 0.3  |
| XLOC_013545 | 40.6  | 57.8  | 73.6  | 37.5  | 0.6 | 0.4  | -1.0 | 0.1  |
| XLOC_018213 | 71.2  | 101.5 | 122.3 | 60.4  | 0.6 | 0.3  | -1.1 | 0.2  |
| XLOC_000161 | 49.3  | 69.7  | 73.7  | 35.6  | 0.6 | 0.2  | -1.1 | 0.4  |

---

---

|             |            |        |        |       |     |      |      |      |
|-------------|------------|--------|--------|-------|-----|------|------|------|
| XLOC_005922 | 18.5       | 25.5   | 30.5   | 13.6  | 0.5 | 0.3  | -1.2 | 0.4  |
| XLOC_026189 | 17.1       | 23.7   | 26.0   | 13.4  | 0.5 | 0.2  | -1.0 | 0.3  |
| XLOC_000474 | 0.5        | 1.4    | 3.2    | 0.4   | 1.5 | 1.2  | -3.0 | 0.3  |
| XLOC_002076 | 2.2        | 5.8    | 5.3    | 2.0   | 1.5 | -0.1 | -1.5 | 0.1  |
| XLOC_012216 | 519.9      | 1339.3 | 4550.1 | 505.7 | 1.5 | 1.8  | -3.2 | 0.0  |
| XLOC_001791 | 164.6      | 428.2  | 650.7  | 72.9  | 1.4 | 0.7  | -3.2 | 1.1  |
| XLOC_020359 | 1279.<br>8 | 3241.5 | 3503.4 | 579.4 | 1.4 | 0.2  | -2.7 | 1.1  |
| XLOC_011487 | 99.0       | 236.8  | 676.2  | 72.6  | 1.4 | 1.6  | -3.3 | 0.4  |
| XLOC_018627 | 7.1        | 17.1   | 18.2   | 4.3   | 1.3 | 0.2  | -2.2 | 0.7  |
| XLOC_010594 | 9.0        | 20.6   | 18.9   | 5.1   | 1.3 | -0.1 | -1.9 | 0.7  |
| XLOC_017774 | 0.6        | 1.3    | 2.7    | 0.6   | 1.2 | 1.2  | -2.3 | -0.1 |
| XLOC_013010 | 1.4        | 2.9    | 3.0    | 0.7   | 1.2 | 0.1  | -2.2 | 1.0  |
| XLOC_008791 | 5.2        | 10.8   | 11.6   | 2.6   | 1.1 | 0.2  | -2.2 | 0.9  |
| XLOC_005127 | 10.8       | 22.2   | 21.4   | 6.3   | 1.1 | 0.0  | -1.8 | 0.7  |
| XLOC_012572 | 1.7        | 3.4    | 6.4    | 0.7   | 1.1 | 1.0  | -3.3 | 1.3  |
| XLOC_004626 | 16.2       | 32.8   | 54.9   | 13.9  | 1.1 | 0.8  | -2.1 | 0.2  |
| XLOC_014760 | 1.0        | 1.8    | 1.4    | 0.7   | 0.9 | -0.3 | -1.1 | 0.5  |
| XLOC_016977 | 0.8        | 1.5    | 3.0    | 0.6   | 0.9 | 1.0  | -2.3 | 0.3  |
| XLOC_007326 | 1.0        | 1.8    | 2.1    | 0.5   | 0.9 | 0.3  | -2.2 | 1.0  |
| XLOC_014622 | 19.9       | 35.8   | 54.0   | 10.1  | 0.9 | 0.6  | -2.5 | 0.9  |
| XLOC_007325 | 1.0        | 1.8    | 2.0    | 0.6   | 0.9 | 0.2  | -1.8 | 0.6  |
| XLOC_024860 | 0.8        | 1.4    | 3.0    | 0.7   | 0.8 | 1.2  | -2.2 | 0.2  |
| XLOC_010465 | 111.2      | 184.1  | 425.2  | 114.7 | 0.8 | 1.3  | -2.0 | -0.1 |
| XLOC_006238 | 1.1        | 1.9    | 2.8    | 1.1   | 0.8 | 0.6  | -1.4 | -0.1 |
| XLOC_008832 | 2.1        | 3.4    | 4.3    | 0.9   | 0.8 | 0.4  | -2.4 | 1.2  |
| XLOC_013289 | 2.8        | 4.5    | 3.7    | 1.3   | 0.8 | -0.2 | -1.5 | 1.0  |
| XLOC_018487 | 1.1        | 1.8    | 2.0    | 0.9   | 0.8 | 0.1  | -1.2 | 0.3  |
| XLOC_015245 | 3.3        | 5.0    | 8.2    | 2.7   | 0.7 | 0.8  | -1.7 | 0.2  |
| XLOC_003548 | 3.4        | 5.3    | 5.2    | 2.2   | 0.7 | 0.0  | -1.3 | 0.6  |
| XLOC_008580 | 2.8        | 4.2    | 3.3    | 1.4   | 0.7 | -0.3 | -1.3 | 0.9  |
| XLOC_005071 | 92.9       | 139.6  | 210.7  | 92.7  | 0.7 | 0.6  | -1.3 | -0.1 |
| XLOC_003296 | 1.2        | 1.8    | 2.0    | 0.8   | 0.6 | 0.2  | -1.3 | 0.4  |
| XLOC_026001 | 13.3       | 19.9   | 20.7   | 8.7   | 0.6 | 0.1  | -1.3 | 0.6  |
| XLOC_001915 | 254.3      | 370.6  | 1429.8 | 189.5 | 0.6 | 2.0  | -3.0 | 0.3  |
| XLOC_013337 | 1.4        | 2.1    | 3.4    | 1.4   | 0.6 | 0.7  | -1.3 | -0.1 |
| XLOC_019775 | 1.9        | 2.7    | 2.5    | 1.0   | 0.6 | 0.0  | -1.4 | 0.9  |
| XLOC_003223 | 9.4        | 13.4   | 16.2   | 7.8   | 0.6 | 0.3  | -1.1 | 0.2  |
| XLOC_012523 | 50.0       | 71.3   | 103.4  | 35.6  | 0.6 | 0.6  | -1.6 | 0.4  |
| XLOC_021816 | 4.1        | 5.9    | 4.7    | 2.1   | 0.6 | -0.3 | -1.3 | 0.9  |
| XLOC_027762 | 114.2      | 160.5  | 139.7  | 70.4  | 0.6 | -0.1 | -1.1 | 0.6  |
| XLOC_007096 | 2.0        | 2.9    | 3.2    | 1.4   | 0.6 | 0.2  | -1.3 | 0.5  |
| XLOC_012667 | 1.3        | 1.9    | 1.9    | 0.9   | 0.6 | 0.1  | -1.2 | 0.5  |
| XLOC_021503 | 2.4        | 3.3    | 3.5    | 1.7   | 0.5 | 0.1  | -1.1 | 0.4  |

---

|             |            |        |       |        |      |      |      |      |
|-------------|------------|--------|-------|--------|------|------|------|------|
| XLOC_014469 | 8.7        | 11.9   | 18.8  | 9.0    | 0.5  | 0.7  | -1.1 | -0.1 |
| XLOC_007558 | 75.2       | 103.6  | 124.2 | 53.4   | 0.5  | 0.3  | -1.3 | 0.4  |
| XLOC_025905 | 2.9        | 4.0    | 5.2   | 2.6    | 0.5  | 0.4  | -1.1 | 0.1  |
| XLOC_022946 | 3.1        | 4.2    | 5.1   | 1.9    | 0.5  | 0.3  | -1.5 | 0.6  |
| XLOC_009883 | 21.2       | 28.9   | 31.8  | 15.5   | 0.5  | 0.2  | -1.1 | 0.4  |
| XLOC_012521 | 30.2       | 40.4   | 45.8  | 22.2   | 0.5  | 0.2  | -1.1 | 0.4  |
| XLOC_025756 | 24.0       | 31.8   | 37.2  | 16.7   | 0.5  | 0.3  | -1.2 | 0.5  |
| XLOC_001645 | 206.8      | 269.0  | 354.5 | 116.2  | 0.5  | 0.5  | -1.7 | 0.8  |
| XLOC_004476 | 2.4        | 3.2    | 2.5   | 1.3    | 0.5  | -0.3 | -1.0 | 0.9  |
| XLOC_000580 | 67.0       | 86.9   | 132.0 | 52.9   | 0.4  | 0.7  | -1.4 | 0.3  |
| XLOC_025592 | 3.2        | 4.0    | 4.4   | 2.2    | 0.4  | 0.2  | -1.1 | 0.4  |
| XLOC_017594 | 188.7      | 241.3  | 427.4 | 157.3  | 0.4  | 0.9  | -1.5 | 0.2  |
| XLOC_017067 | 48.9       | 62.2   | 70.6  | 30.4   | 0.4  | 0.2  | -1.3 | 0.6  |
| XLOC_021721 | 1.5        | 1.9    | 2.1   | 1.0    | 0.4  | 0.2  | -1.2 | 0.6  |
| XLOC_000581 | 35.5       | 43.2   | 68.2  | 23.0   | 0.4  | 0.7  | -1.6 | 0.6  |
| XLOC_017648 | 2.1        | 2.2    | 4.1   | 1.5    | 0.2  | 0.9  | -1.5 | 0.4  |
| XLOC_017553 | 3.5        | 3.7    | 5.8   | 2.8    | 0.2  | 0.7  | -1.1 | 0.3  |
| XLOC_027861 | 11.8       | 5.5    | 5.9   | 10.1   | -1.0 | 0.2  | 0.7  | 0.2  |
| XLOC_006144 | 9.4        | 4.4    | 4.1   | 7.3    | -1.0 | 0.0  | 0.7  | 0.3  |
| XLOC_017655 | 9.1        | 4.3    | 3.9   | 7.5    | -1.0 | -0.1 | 0.9  | 0.2  |
| XLOC_027003 | 56.2       | 24.9   | 26.3  | 42.5   | -1.1 | 0.1  | 0.6  | 0.4  |
| XLOC_006666 | 2.7        | 1.2    | 1.1   | 1.9    | -1.2 | 0.0  | 0.8  | 0.4  |
| XLOC_024949 | 20.5       | 8.6    | 7.9   | 12.9   | -1.2 | -0.1 | 0.6  | 0.6  |
| XLOC_012649 | 19.2       | 8.0    | 6.5   | 12.8   | -1.2 | -0.2 | 0.9  | 0.5  |
| XLOC_026118 | 198.2      | 82.8   | 87.6  | 142.4  | -1.2 | 0.1  | 0.6  | 0.5  |
| XLOC_019804 | 39.7       | 16.1   | 17.2  | 33.8   | -1.2 | 0.2  | 0.9  | 0.2  |
| XLOC_015417 | 18.0       | 7.4    | 7.5   | 14.6   | -1.2 | 0.1  | 0.9  | 0.3  |
| XLOC_009532 | 4.6        | 1.9    | 2.2   | 3.8    | -1.2 | 0.3  | 0.8  | 0.2  |
| XLOC_025800 | 5.8        | 2.5    | 2.6   | 4.8    | -1.3 | 0.1  | 0.9  | 0.3  |
| XLOC_002782 | 10.6       | 4.0    | 3.6   | 6.6    | -1.3 | -0.1 | 0.8  | 0.6  |
| XLOC_003613 | 14.8       | 5.6    | 5.3   | 10.2   | -1.3 | 0.0  | 0.9  | 0.5  |
| XLOC_002445 | 4.6        | 1.7    | 2.0   | 4.1    | -1.4 | 0.3  | 0.9  | 0.1  |
| XLOC_021222 | 16.9       | 5.9    | 7.6   | 11.4   | -1.5 | 0.4  | 0.5  | 0.5  |
| XLOC_021701 | 2.5        | 0.9    | 1.0   | 2.0    | -1.5 | 0.3  | 0.9  | 0.3  |
| XLOC_025906 | 9.5        | 3.2    | 3.6   | 6.1    | -1.5 | 0.2  | 0.7  | 0.6  |
| XLOC_009503 | 8.9        | 2.5    | 3.0   | 5.9    | -1.8 | 0.3  | 0.9  | 0.5  |
| XLOC_022919 | 48.6       | 23.2   | 18.6  | 37.0   | -1.0 | -0.3 | 0.9  | 0.3  |
| XLOC_011737 | 15.3       | 10.1   | 6.3   | 13.7   | -0.5 | -0.6 | 1.0  | 0.1  |
| XLOC_009287 | 2.7        | 1.3    | 0.8   | 2.3    | -1.0 | -0.6 | 1.4  | 0.2  |
| XLOC_019587 | 3890.<br>8 | 7419.3 | 42.6  | 3593.2 | 1.0  | -7.4 | 6.3  | 0.1  |
| XLOC_026258 | 2.0        | 3.5    | 0.7   | 2.9    | 0.9  | -2.3 | 2.0  | -0.6 |
| XLOC_026583 | 3.2        | 4.7    | 0.5   | 2.1    | 0.6  | -3.2 | 2.0  | 0.6  |
| XLOC_011157 | 98.2       | 133.6  | 24.4  | 113.6  | 0.5  | -2.4 | 2.1  | -0.3 |



|             |       |       |      |       |      |      |      |      |
|-------------|-------|-------|------|-------|------|------|------|------|
| XLOC_006551 | 146.2 | 183.4 | 68.7 | 177.1 | 0.4  | -1.4 | 1.3  | -0.3 |
| XLOC_006554 | 53.2  | 47.2  | 5.7  | 45.0  | -0.1 | -3.0 | 2.9  | 0.2  |
| XLOC_022314 | 5.5   | 4.7   | 2.2  | 4.5   | -0.1 | -1.0 | 0.9  | 0.2  |
| XLOC_024619 | 167.8 | 145.7 | 81.1 | 178.8 | -0.1 | -0.8 | 1.1  | -0.1 |
| XLOC_023721 | 5.4   | 4.6   | 1.6  | 4.9   | -0.2 | -1.4 | 1.5  | 0.1  |
| XLOC_003522 | 10.4  | 8.6   | 3.2  | 8.0   | -0.2 | -1.4 | 1.3  | 0.3  |
| XLOC_004341 | 2.3   | 1.9   | 0.2  | 1.6   | -0.2 | -3.5 | 3.3  | 0.4  |
| XLOC_024618 | 291.5 | 234.5 | 70.8 | 363.2 | -0.2 | -1.7 | 2.3  | -0.4 |
| XLOC_001169 | 68.2  | 55.5  | 26.6 | 84.7  | -0.3 | -1.0 | 1.6  | -0.3 |
| XLOC_005543 | 22.5  | 17.4  | 9.7  | 25.5  | -0.3 | -0.8 | 1.3  | -0.2 |
| XLOC_009114 | 2.1   | 3.2   | 1.8  | 1.0   | 0.6  | -0.7 | -1.0 | 1.1  |
| XLOC_010695 | 60.9  | 72.2  | 42.6 | 13.1  | 0.3  | -0.7 | -1.8 | 2.2  |
| XLOC_013085 | 4.1   | 4.8   | 3.5  | 1.9   | 0.3  | -0.4 | -0.9 | 1.0  |
| XLOC_002594 | 23.4  | 17.8  | 12.5 | 9.8   | -0.3 | -0.5 | -0.4 | 1.2  |
| XLOC_002761 | 1.8   | 1.1   | 1.0  | 0.7   | -0.6 | -0.2 | -0.5 | 1.2  |
| XLOC_026238 | 4.2   | 1.9   | 2.9  | 1.5   | -1.1 | 0.6  | -1.0 | 1.5  |
| XLOC_014155 | 113.7 | 63.9  | 37.1 | 33.6  | -0.8 | -0.7 | -0.2 | 1.7  |
| XLOC_007074 | 22.6  | 7.5   | 3.3  | 1.9   | -1.5 | -1.1 | -0.9 | 3.5  |
| XLOC_017534 | 4.6   | 5.8   | 3.6  | 2.2   | 0.4  | -0.6 | -0.8 | 1.0  |
| XLOC_004975 | 18.4  | 20.8  | 13.3 | 7.0   | 0.2  | -0.6 | -1.0 | 1.3  |
| XLOC_027295 | 9.1   | 7.8   | 4.3  | 3.3   | -0.2 | -0.8 | -0.4 | 1.4  |
| XLOC_006685 | 10.4  | 8.5   | 4.2  | 3.3   | -0.2 | -0.9 | -0.4 | 1.6  |
| XLOC_020763 | 104.0 | 82.3  | 46.6 | 48.9  | -0.3 | -0.8 | 0.0  | 1.1  |
| XLOC_001593 | 122.1 | 76.6  | 17.1 | 26.8  | -0.6 | -2.1 | 0.6  | 2.1  |
| XLOC_023619 | 92.8  | 46.1  | 28.9 | 28.3  | -0.9 | -0.6 | -0.1 | 1.7  |
| XLOC_021716 | 22.1  | 10.8  | 8.8  | 9.2   | -1.0 | -0.2 | 0.0  | 1.2  |
| XLOC_012067 | 3.1   | 1.4   | 1.4  | 1.2   | -1.1 | 0.0  | -0.3 | 1.3  |
| XLOC_002004 | 5.5   | 2.4   | 2.1  | 2.5   | -1.2 | -0.1 | 0.1  | 1.1  |
| XLOC_013858 | 20.5  | 8.8   | 7.7  | 9.9   | -1.2 | -0.1 | 0.3  | 1.0  |
| XLOC_002332 | 11.2  | 4.8   | 4.1  | 5.8   | -1.2 | -0.1 | 0.4  | 0.9  |
| XLOC_001426 | 26.6  | 10.9  | 13.3 | 13.0  | -1.2 | 0.3  | -0.1 | 1.0  |
| XLOC_012813 | 183.9 | 71.6  | 86.2 | 104.4 | -1.3 | 0.3  | 0.2  | 0.8  |
| XLOC_013944 | 7.3   | 2.8   | 3.7  | 3.5   | -1.3 | 0.5  | -0.1 | 1.0  |
| XLOC_004690 | 36.8  | 12.2  | 8.8  | 9.8   | -1.5 | -0.4 | 0.1  | 1.9  |
| XLOC_011010 | 9.1   | 3.0   | 2.4  | 2.2   | -1.6 | -0.3 | -0.2 | 2.0  |
| XLOC_019273 | 7.5   | 2.5   | 2.4  | 3.4   | -1.6 | 0.0  | 0.4  | 1.1  |
| XLOC_019553 | 23.2  | 6.5   | 6.9  | 9.0   | -1.8 | 0.1  | 0.3  | 1.3  |
| XLOC_006724 | 3.9   | 1.0   | 0.6  | 1.1   | -1.9 | -0.8 | 0.8  | 1.8  |
| XLOC_028071 | 13.7  | 2.6   | 2.9  | 3.1   | -2.3 | 0.2  | 0.0  | 2.1  |
| XLOC_023544 | 58.4  | 2.4   | 1.5  | 1.0   | -4.6 | -0.6 | -0.7 | 5.9  |
| XLOC_007440 | 43.0  | 0.8   | 0.4  | 0.5   | -5.6 | -1.1 | 0.3  | 6.5  |
| XLOC_024538 | 61.8  | 83.6  | 86.5 | 128.7 | 0.5  | 0.1  | 0.5  | -1.1 |
| XLOC_022323 | 196.7 | 97.9  | 44.2 | 57.1  | -0.9 | -1.1 | 0.3  | 1.7  |
| XLOC_020029 | 23.1  | 11.1  | 7.1  | 8.6   | -1.0 | -0.6 | 0.2  | 1.4  |

|             |            |        |        |       |      |      |      |      |
|-------------|------------|--------|--------|-------|------|------|------|------|
| XLOC_010283 | 88.3       | 32.3   | 20.4   | 27.1  | -1.4 | -0.6 | 0.3  | 1.7  |
| XLOC_021047 | 24.3       | 7.4    | 3.3    | 4.8   | -1.6 | -1.1 | 0.5  | 2.3  |
| XLOC_002915 | 21.1       | 2.8    | 0.8    | 1.5   | -2.9 | -1.8 | 0.9  | 3.8  |
| XLOC_026237 | 65.8       | 85.3   | 169.0  | 180.4 | 0.4  | 1.0  | 0.0  | -1.5 |
| XLOC_000505 | 7.3        | 5.9    | 24.5   | 38.0  | -0.2 | 2.1  | 0.6  | -2.4 |
| XLOC_007253 | 8.2        | 5.1    | 17.0   | 23.2  | -0.6 | 1.8  | 0.4  | -1.6 |
| XLOC_008540 | 11.8       | 21.3   | 16.7   | 3.8   | 0.9  | -0.3 | -2.2 | 1.6  |
| XLOC_020378 | 305.2      | 543.0  | 567.2  | 119.9 | 0.9  | 0.1  | -2.3 | 1.3  |
| XLOC_009553 | 34.6       | 61.3   | 55.3   | 18.7  | 0.9  | -0.1 | -1.6 | 0.8  |
| XLOC_008644 | 23.2       | 39.4   | 38.6   | 14.1  | 0.8  | 0.0  | -1.5 | 0.7  |
| XLOC_019472 | 6.0        | 10.4   | 9.1    | 3.5   | 0.8  | -0.1 | -1.4 | 0.8  |
| XLOC_023300 | 22.4       | 37.0   | 36.1   | 10.3  | 0.8  | 0.0  | -1.9 | 1.1  |
| XLOC_020006 | 16.2       | 26.2   | 17.8   | 4.2   | 0.8  | -0.5 | -2.2 | 1.9  |
| XLOC_002830 | 5.5        | 8.5    | 6.7    | 2.6   | 0.7  | -0.3 | -1.4 | 1.0  |
| XLOC_005852 | 7.9        | 12.1   | 10.8   | 2.5   | 0.7  | -0.1 | -2.2 | 1.6  |
| XLOC_027616 | 6.0        | 9.3    | 8.2    | 3.5   | 0.7  | -0.1 | -1.3 | 0.7  |
| XLOC_022690 | 29.3       | 42.7   | 33.0   | 16.5  | 0.6  | -0.3 | -1.1 | 0.8  |
| XLOC_017068 | 36.1       | 52.2   | 45.0   | 20.0  | 0.6  | -0.2 | -1.2 | 0.8  |
| XLOC_010583 | 36.0       | 51.3   | 38.0   | 18.1  | 0.6  | -0.4 | -1.1 | 0.9  |
| XLOC_015679 | 35.8       | 60.8   | 47.8   | 15.2  | 0.8  | -0.3 | -1.7 | 1.2  |
| XLOC_004575 | 5.9        | 9.2    | 6.4    | 2.4   | 0.7  | -0.5 | -1.5 | 1.2  |
| XLOC_012711 | 34.6       | 53.4   | 42.4   | 17.9  | 0.7  | -0.3 | -1.3 | 0.9  |
| XLOC_012389 | 3.5        | 4.8    | 4.3    | 1.7   | 0.5  | -0.1 | -1.4 | 1.0  |
| XLOC_013870 | 13.6       | 18.8   | 13.4   | 6.2   | 0.5  | -0.4 | -1.2 | 1.1  |
| XLOC_014498 | 182.8      | 250.5  | 248.8  | 107.5 | 0.5  | 0.0  | -1.3 | 0.7  |
| XLOC_024066 | 55.9       | 75.5   | 73.2   | 32.4  | 0.5  | 0.0  | -1.2 | 0.7  |
| XLOC_005649 | 1.6        | 2.0    | 1.5    | 0.7   | 0.4  | -0.4 | -1.1 | 1.0  |
| XLOC_019230 | 9.5        | 11.8   | 10.7   | 3.4   | 0.4  | -0.1 | -1.7 | 1.4  |
| XLOC_016845 | 9.8        | 12.1   | 9.7    | 5.0   | 0.4  | -0.3 | -1.0 | 0.9  |
| XLOC_019277 | 6468.<br>8 | 7112.3 | 6217.0 | 135.1 | 0.2  | -0.1 | -5.6 | 5.5  |
| XLOC_001499 | 28.0       | 24.0   | 45.2   | 15.5  | -0.2 | 1.0  | -1.6 | 0.8  |
| XLOC_009388 | 100.2      | 60.2   | 115.5  | 42.5  | -0.7 | 1.0  | -1.5 | 1.2  |
| XLOC_019528 | 7.2        | 3.4    | 2.4    | 4.1   | -1.1 | -0.4 | 0.7  | 0.8  |
| XLOC_025365 | 43.9       | 19.7   | 14.3   | 26.0  | -1.1 | -0.4 | 0.8  | 0.7  |
| XLOC_026328 | 20.7       | 8.9    | 7.8    | 12.7  | -1.1 | -0.1 | 0.6  | 0.6  |
| XLOC_025127 | 17.2       | 6.9    | 5.1    | 9.5   | -1.3 | -0.4 | 0.8  | 0.8  |
| XLOC_004502 | 22.3       | 8.3    | 8.1    | 13.8  | -1.4 | 0.0  | 0.7  | 0.6  |
| XLOC_003321 | 78.7       | 29.2   | 17.0   | 30.5  | -1.4 | -0.7 | 0.8  | 1.3  |
| XLOC_027132 | 249.7      | 92.9   | 65.2   | 126.9 | -1.4 | -0.5 | 0.9  | 0.9  |
| XLOC_027184 | 63.8       | 23.7   | 28.1   | 39.9  | -1.4 | 0.3  | 0.4  | 0.6  |
| XLOC_026327 | 10.7       | 3.7    | 3.0    | 5.9   | -1.5 | -0.2 | 0.9  | 0.8  |
| XLOC_004918 | 22.1       | 7.5    | 7.3    | 13.2  | -1.5 | 0.0  | 0.8  | 0.7  |
| XLOC_021470 | 40.0       | 13.5   | 12.1   | 19.9  | -1.5 | -0.1 | 0.6  | 1.0  |

---

|             |       |       |       |        |      |      |     |      |
|-------------|-------|-------|-------|--------|------|------|-----|------|
| XLOC_019434 | 24.0  | 7.4   | 5.5   | 10.7   | -1.6 | -0.4 | 0.9 | 1.1  |
| XLOC_015288 | 44.6  | 13.0  | 12.8  | 21.5   | -1.7 | 0.0  | 0.7 | 1.0  |
| XLOC_014303 | 23.9  | 5.4   | 4.0   | 7.6    | -2.1 | -0.4 | 0.9 | 1.6  |
| XLOC_006892 | 37.1  | 6.8   | 9.6   | 15.7   | -2.4 | 0.5  | 0.7 | 1.2  |
| XLOC_013838 | 3.1   | 4.4   | 1.8   | 6.3    | 0.5  | -1.2 | 1.7 | -1.1 |
| XLOC_007787 | 1.5   | 1.9   | 2.3   | 5.2    | 0.4  | 0.4  | 1.1 | -1.9 |
| XLOC_002103 | 119.2 | 123.5 | 168.9 | 266.7  | 0.1  | 0.5  | 0.6 | -1.2 |
| XLOC_011819 | 60.3  | 59.4  | 75.0  | 270.3  | 0.0  | 0.4  | 1.8 | -2.2 |
| XLOC_010174 | 444.0 | 436.8 | 613.3 | 1200.1 | 0.0  | 0.5  | 0.9 | -1.5 |
| XLOC_014661 | 32.4  | 31.1  | 36.0  | 74.4   | 0.0  | 0.3  | 1.0 | -1.3 |
| XLOC_018399 | 409.0 | 342.8 | 426.5 | 858.1  | -0.2 | 0.4  | 0.9 | -1.1 |
| XLOC_000468 | 12.5  | 8.9   | 12.2  | 26.7   | -0.4 | 0.5  | 1.1 | -1.2 |
| XLOC_020289 | 11.2  | 6.5   | 2.8   | 4.9    | -0.7 | -1.2 | 0.8 | 1.1  |
| XLOC_000873 | 5.9   | 2.6   | 1.2   | 2.4    | -1.1 | -1.0 | 0.9 | 1.2  |
| XLOC_008837 | 135.6 | 53.7  | 35.5  | 69.2   | -1.3 | -0.5 | 0.9 | 0.9  |
| XLOC_019312 | 75.4  | 26.1  | 13.6  | 25.0   | -1.5 | -0.9 | 0.8 | 1.5  |
| XLOC_021499 | 21.4  | 12.1  | 5.9   | 12.9   | -0.8 | -1.0 | 1.1 | 0.7  |
| XLOC_018389 | 2.6   | 3.8   | 0.6   | 4.9    | 0.6  | -2.6 | 2.9 | -1.0 |
| XLOC_018717 | 55.9  | 48.4  | 9.2   | 33.9   | -0.1 | -2.3 | 1.8 | 0.7  |
| XLOC_012727 | 18.0  | 14.5  | 20.3  | 40.6   | -0.3 | 0.5  | 0.9 | -1.2 |
| XLOC_002407 | 2.6   | 1.9   | 4.5   | 13.1   | -0.3 | 1.3  | 1.5 | -2.4 |
| XLOC_003456 | 20.5  | 15.4  | 36.7  | 138.5  | -0.3 | 1.3  | 1.8 | -2.8 |
| XLOC_012971 | 5.3   | 3.6   | 6.2   | 13.7   | -0.5 | 0.8  | 1.1 | -1.4 |
| XLOC_019458 | 0.6   | 0.3   | 1.0   | 2.3    | -0.9 | 1.7  | 1.2 | -2.0 |

---

80

81

82 **Table S4:** The tissue-specific genes expression in goat

| gene    | Bladder | Brain | Heart | Kidney | Liver | Lung | Lymph | Muscle | Ovarian | Spleen | SFA | SFB | SFC | PFA | PFB | PFC |
|---------|---------|-------|-------|--------|-------|------|-------|--------|---------|--------|-----|-----|-----|-----|-----|-----|
| FOXP1   | 0       | 0     | 0     | 0      | 0     | 0    | 0     | 0      | 0       | 0      | 768 | 477 | 851 | 487 | 129 | 503 |
| DLX1    | 0       | 0     | 0     | 0      | 0     | 0    | 0     | 0      | 0       | 0      | 0   | 2   | 0   | 0   | 1   | 1   |
| MDF1    | 3       | 1     | 1     | 0      | 0     | 2    | 1     | 2      | 2       | 0      | 10  | 21  | 12  | 8   | 8   | 15  |
| ARID3A  | 3       | 1     | 1     | 4      | 1     | 6    | 15    | 2      | 2       | 23     | 15  | 15  | 18  | 17  | 5   | 16  |
| BHLHE23 | 0       | 0     | 0     | 3      | 1     | 0    | 0     | 0      | 0       | 0      | 17  | 13  | 12  | 19  | 5   | 27  |
| KLF3    | 24      | 13    | 13    | 19     | 20    | 30   | 14    | 11     | 22      | 13     | 10  | 4   | 2   | 13  | 10  | 15  |
| CSDC2   | 3       | 35    | 13    | 18     | 0     | 1    | 0     | 1      | 6       | 0      | 344 | 349 | 524 | 260 | 55  | 182 |
| E4F1    | 4       | 5     | 3     | 6      | 0     | 5    | 7     | 4      | 7       | 5      | 3   | 3   | 1   | 3   | 2   | 3   |
| MSX1    | 2       | 3     | 1     | 2      | 0     | 0    | 0     | 2      | 2       | 1      | 13  | 13  | 4   | 6   | 6   | 14  |
| MSX2    | 3       | 1     | 0     | 0      | 1     | 1    | 0     | 0      | 1       | 1      | 101 | 96  | 97  | 107 | 119 | 119 |
| CUX2    | 0       | 1     | 0     | 0      | 0     | 0    | 0     | 0      | 0       | 0      | 0   | 0   | 0   | 0   | 0   | 0   |
| VAX2    | 0       | 1     | 0     | 0      | 0     | 0    | 2     | 0      | 1       | 1      | 1   | 2   | 0   | 1   | 2   | 2   |
| ELF5    | 0       | 12    | 0     | 20     | 1     | 2    | 0     | 1      | 0       | 0      | 133 | 128 | 120 | 86  | 127 | 107 |
| DLX3    | 1       | 0     | 0     | 0      | 0     | 0    | 0     | 0      | 0       | 0      | 309 | 409 | 332 | 249 | 101 | 365 |
| DLX4    | 1       | 0     | 0     | 0      | 0     | 0    | 0     | 1      | 2       | 0      | 75  | 70  | 93  | 116 | 27  | 37  |
| HOXC13  | 0       | 0     | 0     | 0      | 0     | 0    | 0     | 0      | 0       | 0      | 214 | 251 | 258 | 189 | 225 | 304 |
| ATF3    | 61      | 2     | 7     | 26     | 4     | 12   | 2     | 355    | 8       | 5      | 4   | 15  | 0   | 8   | 3   | 15  |
| FOSB    | 39      | 0     | 2     | 1      | 0     | 6    | 0     | 6      | 4       | 9      | 1   | 0   | 0   | 0   | 0   | 0   |
| IL31RA  | 0       | 0     | 0     | 0      | 0     | 0    | 0     | 0      | 0       | 0      | 2   | 0   | 0   | 0   | 0   | 1   |
| FOXP3   | 0       | 0     | 0     | 0      | 0     | 0    | 0     | 0      | 0       | 0      | 0   | 0   | 0   | 0   | 0   | 0   |
| TWIST2  | 9       | 0     | 0     | 0      | 0     | 1    | 1     | 0      | 4       | 0      | 0   | 0   | 0   | 0   | 0   | 0   |
| ANK2    | 5       | 23    | 14    | 6      | 0     | 1    | 2     | 6      | 4       | 1      | 0   | 0   | 0   | 1   | 0   | 0   |
| LOXL4   | 1       | 0     | 3     | 12     | 2     | 1    | 0     | 0      | 1       | 1      | 0   | 0   | 0   | 0   | 0   | 0   |
| HAND2   | 50      | 0     | 69    | 0      | 3     | 0    | 0     | 0      | 2       | 4      | 0   | 0   | 0   | 0   | 0   | 0   |

83

84

85 **Table S5:** The GO terms of each cluster

| cluster | p-value  | term ID    | t type | t name                                                                        |
|---------|----------|------------|--------|-------------------------------------------------------------------------------|
| k1      | 2.60E-03 | GO:0008544 | BP     | epidermis development                                                         |
| k1      | 7.08E-03 | GO:0043588 | BP     | skin development                                                              |
| k1      | 7.67E-03 | GO:0008652 | BP     | cellular amino acid biosynthetic process                                      |
| k1      | 9.95E-03 | GO:0042633 | BP     | hair cycle                                                                    |
| k1      | 1.32E-02 | GO:0035878 | BP     | nail development                                                              |
| k1      | 1.68E-02 | GO:0071578 | BP     | zinc II ion transmembrane import                                              |
| k2      | 2.27E-20 | GO:0022402 | BP     | cell cycle process                                                            |
| k2      | 7.15E-18 | GO:0000280 | BP     | nuclear division                                                              |
| k2      | 8.38E-14 | GO:0007059 | BP     | chromosome segregation                                                        |
| k2      | 1.72E-13 | GO:0051301 | BP     | cell division                                                                 |
| k2      | 2.82E-05 | GO:0007017 | BP     | microtubule-based process                                                     |
| k2      | 1.65E-02 | GO:0034501 | BP     | protein localization to kinetochore                                           |
| k3      | 3.55E-04 | GO:0042742 | BP     | defense response to bacterium                                                 |
| k3      | 5.22E-04 | GO:0050832 | BP     | defense response to fungus                                                    |
| k3      | 4.94E-02 | GO:0032826 | BP     | regulation of natural killer cell differentiation involved in immune response |
| k3      | 4.94E-02 | GO:0032824 | BP     | negative regulation of natural killer cell differentiation                    |
| k3      | 4.94E-02 | GO:0070488 | BP     | neutrophil aggregation                                                        |
| k5      | 1.73E-09 | GO:0006955 | BP     | immune response                                                               |
| k5      | 3.47E-08 | GO:0007155 | BP     | cell adhesion                                                                 |
| k5      | 4.51E-07 | GO:0002684 | BP     | positive regulation of immune system process                                  |
| k5      | 1.33E-06 | GO:0001775 | BP     | cell activation                                                               |
| k5      | 3.27E-06 | GO:0006952 | BP     | defense response                                                              |
| k5      | 6.64E-06 | GO:0044700 | BP     | single organism signaling                                                     |
| k5      | 1.85E-05 | GO:0050900 | BP     | leukocyte migration                                                           |
| k5      | 2.02E-05 | GO:0007154 | BP     | cell communication                                                            |
| k5      | 8.25E-05 | GO:0051240 | BP     | positive regulation of multicellular organismal process                       |
| k5      | 3.96E-04 | GO:0030198 | BP     | extracellular matrix organization                                             |
| k5      | 9.17E-04 | GO:0065008 | BP     | regulation of biological quality                                              |
| k5      | 9.80E-04 | GO:0010562 | BP     | positive regulation of phosphorus metabolic process                           |
| k5      | 3.23E-03 | GO:0070661 | BP     | leukocyte proliferation                                                       |
| k5      | 9.61E-03 | GO:0003084 | BP     | positive regulation of systemic arterial blood pressure                       |
| k5      | 2.83E-02 | GO:0001934 | BP     | positive regulation of protein phosphorylation                                |
| k5      | 2.96E-02 | GO:0034097 | BP     | response to cytokine                                                          |
| k6      | 9.27E-08 | GO:0006952 | BP     | defense response                                                              |
| k6      | 8.73E-05 | GO:0002376 | BP     | immune system process                                                         |
| k6      | 2.02E-04 | GO:0060326 | BP     | cell chemotaxis                                                               |
| k6      | 3.56E-04 | GO:0072676 | BP     | lymphocyte migration                                                          |
| k6      | 2.05E-03 | GO:0002548 | BP     | monocyte chemotaxis                                                           |
| k6      | 1.07E-02 | GO:0051336 | BP     | regulation of hydrolase activity                                              |
| k6      | 1.46E-02 | GO:0071347 | BP     | cellular response to interleukin-1                                            |

|    |          |            |    |                                                |
|----|----------|------------|----|------------------------------------------------|
| k6 | 1.48E-02 | GO:0007166 | BP | cell surface receptor signaling pathway        |
| k6 | 1.81E-02 | GO:1990266 | BP | neutrophil migration                           |
| k6 | 2.38E-02 | GO:0070372 | BP | regulation of ERK1 and ERK2 cascade            |
| k6 | 2.68E-02 | GO:0048660 | BP | regulation of smooth muscle cell proliferation |
| k6 | 3.99E-02 | GO:0051385 | BP | response to mineralocorticoid                  |
| k6 | 4.59E-02 | GO:0072677 | BP | eosinophil migration                           |
| k7 | 2.82E-03 | GO:2000406 | BP | positive regulation of T cell migration        |
| k7 | 1.95E-02 | GO:0002684 | BP | positive regulation of immune system process   |
| k8 | 7.07E-14 | GO:0030198 | BP | extracellular matrix organization              |
| k8 | 3.16E-10 | GO:0032501 | BP | multicellular organismal process               |
| k8 | 5.76E-05 | GO:0007275 | BP | multicellular organism development             |
| k8 | 2.00E-03 | GO:0007155 | BP | cell adhesion                                  |
| k8 | 1.33E-02 | GO:0010463 | BP | mesenchymal cell proliferation                 |

86

87

The enriched GO terms of biological process of overlapped genes of periodic and transitions

| p-value  | term ID    | t type | t name             | gene list                    |
|----------|------------|--------|--------------------|------------------------------|
| 2.10E-03 | GO:0007494 | BP     | midgut development | ALDH1A2,ASS1,EDNRB,RET       |
| 9.33E-05 | GO:0035878 | BP     | nail development   | FOXN1,MSX2,HOXC13,KRT84,MSX1 |

88

89

90 **Table S6:** The short photoperiod response genes of June and the overlapped genes between

91 periodic genes

| gene_id     | gene                          | FPKM value |        |        |        |        | log2(fold_change) |     |       | sig<br>SD/T I/III |
|-------------|-------------------------------|------------|--------|--------|--------|--------|-------------------|-----|-------|-------------------|
|             |                               | Jun        | Jun_SD | Aug    | Jan    | Apr    | Jun               | T I | T III |                   |
| XLOC_012224 | KRT38                         | 0.4        | 30.6   | 42.5   | 2.1    | 0.4    | 6.4               | 6.9 | -1.7  | yes               |
| XLOC_012223 | LOC102176161                  | 3.1        | 126.8  | 175.9  | 9.9    | 2.6    | 5.4               | 5.9 | -1.9  | yes               |
| XLOC_002440 | KRTAP15-1                     | 24.6       | 260.2  | 236.9  | 463.1  | 192.6  | 3.4               | 3.3 | -2.2  | yes               |
| XLOC_002881 | XLOC_004108                   | 16.0       | 169.9  | 165.0  | 100.4  | 23.3   | 3.4               | 3.4 | -2.3  | yes               |
| XLOC_023551 | FGF5                          | 0.3        | 3.7    | 5.3    | 3.2    | 0.2    | 3.3               | 4.0 | -4.1  | yes               |
| XLOC_002880 | XLOC_004107                   | 1.3        | 12.8   | 8.2    | 9.4    | 2.0    | 3.3               | 2.7 | -2.0  | yes               |
| XLOC_023409 | KLF3,LOC106502202             | 30.7       | 300.8  | 114.4  | 265.8  | 27.6   | 3.3               | 1.9 | -3.4  | yes               |
| XLOC_018070 | LOC102185808,<br>XLOC_029682  | 0.2        | 1.8    | 1.7    | 2.3    | 0.6    | 3.2               | 3.1 | -2.3  | yes               |
| XLOC_004549 | C11H9orf171                   | 0.3        | 2.3    | 4.0    | 3.4    | 0.5    | 3.2               | 4.0 | -3.2  | yes               |
| XLOC_012215 | LOC102179044                  | 11.7       | 83.6   | 57.0   | 128.5  | 28.9   | 2.9               | 2.3 | -2.9  | yes               |
| XLOC_001624 | LOC106501809                  | 176.2      | 1245.8 | 1210.7 | 1399.3 | 238.6  | 2.8               | 2.8 | -2.5  | yes               |
| XLOC_007003 | SLCO5A1                       | 0.6        | 3.9    | 3.3    | 4.8    | 1.4    | 2.6               | 2.4 | -2.2  | yes               |
| XLOC_002976 | XLOC_005227                   | 0.6        | 3.5    | 4.0    | 4.2    | 1.2    | 2.6               | 2.8 | -1.9  | yes               |
| XLOC_021720 | ATP6V0A4                      | 1.5        | 9.0    | 10.7   | 8.3    | 1.7    | 2.6               | 2.9 | -2.4  | yes               |
| XLOC_012846 | XLOC_020714                   | 29.3       | 172.7  | 201.0  | 176.9  | 46.1   | 2.6               | 2.8 | -1.9  | yes               |
| XLOC_011489 | LOC102174332                  | 87.7       | 496.9  | 235.3  | 858.2  | 101.8  | 2.5               | 1.5 | -3.4  | yes               |
| XLOC_012211 | LOC106503216                  | 148.4      | 831.3  | 479.9  | 1925.4 | 465.9  | 2.5               | 1.7 | -2.7  | yes               |
| XLOC_012212 | LOC106503203,<br>LOC106503217 | 120.0      | 671.3  | 536.4  | 1444.4 | 300.5  | 2.5               | 2.2 | -2.8  | yes               |
| XLOC_006420 | LOC102174044                  | 22.7       | 123.7  | 107.4  | 120.8  | 29.6   | 2.5               | 2.3 | -2.1  | yes               |
| XLOC_012210 | LOC102178767                  | 90.8       | 488.5  | 254.5  | 974.3  | 237.3  | 2.4               | 1.5 | -2.8  | yes               |
| XLOC_005321 | LOC102168837                  | 1.3        | 6.9    | 7.0    | 6.8    | 1.0    | 2.4               | 2.4 | -2.8  | yes               |
| XLOC_011485 | LOC102172755                  | 17.5       | 90.0   | 44.9   | 193.6  | 26.0   | 2.3               | 1.4 | -3.6  | yes               |
| XLOC_002855 | LOC100861174                  | 50.6       | 253.4  | 232.7  | 256.1  | 63.8   | 2.3               | 2.2 | -2.2  | yes               |
| XLOC_001920 | LOC102181992                  | 11.7       | 57.3   | 53.8   | 89.7   | 26.9   | 2.3               | 2.3 | -2.4  | yes               |
| XLOC_023332 | LOC102181374                  | 22.8       | 109.3  | 68.6   | 82.5   | 22.0   | 2.3               | 1.6 | -2.4  | yes               |
| XLOC_012206 | LOC102170264                  | 177.5      | 852.3  | 764.9  | 1901.6 | 425.2  | 2.3               | 2.2 | -2.8  | yes               |
| XLOC_019607 | TCHHL1                        | 23.1       | 109.0  | 74.5   | 69.2   | 18.2   | 2.2               | 1.7 | -2.5  | yes               |
| XLOC_021917 | LOC102183766                  | 157.7      | 745.5  | 874.9  | 1432.5 | 542.2  | 2.2               | 2.5 | -2.1  | yes               |
| XLOC_012205 | LOC102170546                  | 240.5      | 1132.4 | 1364.0 | 2721.9 | 492.5  | 2.2               | 2.6 | -3.0  | yes               |
| XLOC_001671 | LOC102185562                  | 534.7      | 2509.7 | 1871.5 | 8079.8 | 2178.5 | 2.2               | 1.9 | -2.7  | yes               |
| XLOC_002343 | XLOC_003656                   | 774.4      | 3615.8 | 2862.3 | 5476.6 | 1226.2 | 2.2               | 1.9 | -2.2  | yes               |
| XLOC_023727 | SPP1                          | 39.6       | 178.7  | 189.1  | 158.6  | 39.0   | 2.2               | 2.3 | -2.4  | yes               |
| XLOC_002368 | LOC102189437,<br>LOC106502465 | 226.8      | 1015.8 | 910.3  | 1182.5 | 247.3  | 2.2               | 2.1 | -2.4  | yes               |

|             |                              |        |        |        |         |        |     |     |      |     |
|-------------|------------------------------|--------|--------|--------|---------|--------|-----|-----|------|-----|
| XLOC_012208 | KRTAP3-1                     | 1621.3 | 7103.5 | 5894.6 | 15767.2 | 4588.8 | 2.1 | 1.9 | -2.5 | yes |
| XLOC_013628 | GABRP                        | 13.2   | 56.4   | 51.1   | 34.3    | 7.0    | 2.1 | 2.0 | -2.6 | yes |
| XLOC_006150 | XLOC_010159                  | 1.4    | 5.9    | 4.6    | 6.6     | 1.7    | 2.1 | 1.8 | -2.6 | yes |
| XLOC_012220 | LOC102179881                 | 168.4  | 733.4  | 766.1  | 1333.1  | 341.5  | 2.1 | 2.2 | -2.7 | yes |
| XLOC_019377 | LOC106503767                 | 19.8   | 85.4   | 111.8  | 76.3    | 21.9   | 2.1 | 2.5 | -2.2 | yes |
| XLOC_012845 | LOC106503370,<br>XLOC_020712 | 149.8  | 623.9  | 728.4  | 509.9   | 109.8  | 2.1 | 2.3 | -2.4 | yes |
| XLOC_005227 | XLOC_008892                  | 0.5    | 2.1    | 3.4    | 1.1     | 0.3    | 2.0 | 2.8 | -1.9 | yes |
| XLOC_003207 | CHAC1                        | 14.7   | 60.9   | 79.7   | 68.4    | 43.9   | 2.0 | 2.5 | -1.4 | yes |
| XLOC_001922 | LOC102182538                 | 36.4   | 148.9  | 124.2  | 104.4   | 25.0   | 2.0 | 1.8 | -2.1 | yes |
| XLOC_019378 | XLOC_031190                  | 3.1    | 12.5   | 11.5   | 8.5     | 1.3    | 2.0 | 1.9 | -3.0 | yes |
| XLOC_012203 | KRT39                        | 8.7    | 35.3   | 34.4   | 44.7    | 9.1    | 2.0 | 2.0 | -2.7 | yes |
| XLOC_019791 | XLOC_032051                  | 2.5    | 10.2   | 11.7   | 7.2     | 2.1    | 2.0 | 2.2 | -2.3 | yes |
| XLOC_017141 | PRSS27                       | 10.1   | 40.5   | 62.3   | 31.7    | 11.2   | 2.0 | 2.7 | -1.6 | yes |
| XLOC_020367 | LOC102184574                 | 91.5   | 362.0  | 313.8  | 374.5   | 47.9   | 2.0 | 1.8 | -3.1 | yes |
| XLOC_010587 | XLOC_016760                  | 11.7   | 46.5   | 36.2   | 95.3    | 29.6   | 2.0 | 1.7 | -2.2 | yes |
| XLOC_012214 | LOC102171368                 | 131.4  | 519.5  | 352.4  | 1207.8  | 197.4  | 2.0 | 1.5 | -3.1 | yes |
| XLOC_000455 | BHLHE23                      | 1.2    | 4.6    | 3.1    | 6.0     | 1.2    | 2.0 | 1.4 | -3.0 | yes |
| XLOC_027137 | HS6ST2                       | 0.7    | 2.7    | 2.0    | 1.4     | 0.6    | 2.0 | 1.6 | -1.5 | yes |
| XLOC_021913 | KRT82                        | 40.8   | 161.2  | 138.7  | 318.9   | 95.1   | 2.0 | 1.8 | -2.4 | yes |
| XLOC_012213 | LOC106503204                 | 92.9   | 359.3  | 300.0  | 798.2   | 191.8  | 2.0 | 1.7 | -2.7 | yes |
| XLOC_022617 | LOC102183211                 | 228.8  | 875.7  | 1028.7 | 1800.4  | 633.4  | 1.9 | 2.2 | -2.3 | yes |
| XLOC_000403 | ARSH                         | 3.5    | 13.1   | 10.2   | 9.8     | 3.1    | 1.9 | 1.6 | -2.1 | yes |
| XLOC_002367 | LOC102172766                 | 149.7  | 558.3  | 607.3  | 486.3   | 114.5  | 1.9 | 2.1 | -2.2 | yes |
| XLOC_012228 | XLOC_019208                  | 3.5    | 13.0   | 8.1    | 12.6    | 5.2    | 1.9 | 1.3 | -2.0 | yes |
| XLOC_022270 | GPRC5D                       | 135.3  | 499.5  | 475.3  | 872.0   | 179.4  | 1.9 | 1.9 | -2.9 | yes |
| XLOC_006152 | BAMBI                        | 19.6   | 69.8   | 53.6   | 64.6    | 16.8   | 1.9 | 1.5 | -2.4 | yes |
| XLOC_010129 | LOC102181710                 | 13.8   | 49.9   | 39.6   | 45.4    | 18.4   | 1.9 | 1.6 | -1.6 | yes |
| XLOC_017969 | LOC102188015                 | 48.5   | 174.9  | 328.1  | 258.0   | 101.3  | 1.9 | 2.8 | -1.8 | yes |
| XLOC_015943 | LOC102174444                 | 0.4    | 1.3    | 2.0    | 1.6     | 0.8    | 1.8 | 2.4 | -1.7 | yes |
| XLOC_019475 | VSIG8                        | 206.3  | 748.2  | 711.1  | 680.2   | 183.5  | 1.8 | 1.8 | -2.2 | yes |
| XLOC_012462 | SSTR2                        | 0.6    | 2.1    | 1.5    | 2.5     | 1.3    | 1.8 | 1.4 | -1.9 | yes |
| XLOC_004647 | LYG2                         | 21.1   | 74.5   | 62.7   | 57.4    | 14.5   | 1.8 | 1.6 | -2.2 | yes |
| XLOC_012195 | K26                          | 37.0   | 130.6  | 106.2  | 103.6   | 24.0   | 1.8 | 1.6 | -2.5 | yes |
| XLOC_019031 | HEPHL1                       | 16.9   | 59.9   | 45.0   | 58.0    | 17.7   | 1.8 | 1.5 | -2.3 | yes |
| XLOC_012218 | LOC102173780                 | 119.6  | 424.4  | 368.1  | 510.3   | 122.6  | 1.8 | 1.7 | -2.4 | yes |
| XLOC_009262 | CUX2                         | 0.3    | 1.0    | 1.9    | 1.9     | 0.2    | 1.8 | 2.8 | -3.5 | yes |
| XLOC_005330 | CLDN10                       | 2.6    | 9.1    | 9.7    | 9.5     | 2.3    | 1.8 | 1.9 | -2.1 | yes |
| XLOC_002702 | CLDN11                       | 2.5    | 8.5    | 6.5    | 4.3     | 1.7    | 1.8 | 1.4 | -1.5 | yes |
| XLOC_021916 | LOC102185436                 | 543.3  | 1919.1 | 2017.8 | 3307.9  | 992.8  | 1.8 | 1.9 | -2.4 | yes |
| XLOC_012204 | KRT40                        | 9.2    | 32.2   | 30.9   | 28.8    | 9.1    | 1.8 | 1.8 | -1.9 | yes |
| XLOC_001921 | LOC102182256                 | 251.9  | 873.5  | 844.6  | 964.1   | 231.2  | 1.8 | 1.8 | -2.4 | yes |
| XLOC_014187 | STRA6                        | 1.1    | 3.7    | 3.0    | 2.2     | 1.3    | 1.8 | 1.6 | -1.2 | yes |



|             |                               |       |        |        |        |        |     |     |      |     |
|-------------|-------------------------------|-------|--------|--------|--------|--------|-----|-----|------|-----|
| XLOC_019697 | CASQ2                         | 1.0   | 3.6    | 4.4    | 2.1    | 0.6    | 1.8 | 2.1 | -1.9 | yes |
| XLOC_001917 | LOC100861175                  | 569.8 | 1958.8 | 2168.8 | 3977.9 | 999.8  | 1.8 | 2.0 | -2.7 | yes |
| XLOC_002342 | XLOC_003655                   | 621.9 | 2143.4 | 2206.7 | 3215.3 | 541.5  | 1.8 | 1.9 | -2.7 | yes |
| XLOC_001167 | KRT72                         | 136.1 | 469.3  | 423.0  | 419.8  | 78.9   | 1.8 | 1.7 | -2.7 | yes |
| XLOC_019596 | LOC102186542,<br>LOC106501816 | 10.0  | 34.4   | 33.4   | 31.9   | 10.7   | 1.8 | 1.8 | -1.8 | yes |
| XLOC_019597 | CRNN                          | 22.3  | 75.6   | 102.8  | 82.6   | 28.6   | 1.8 | 2.3 | -1.8 | yes |
| XLOC_012207 | LOC100861179                  | 37.0  | 125.3  | 130.2  | 135.9  | 28.1   | 1.7 | 1.9 | -2.4 | yes |
| XLOC_023299 | ETNPPL                        | 1.7   | 5.7    | 7.4    | 6.2    | 1.8    | 1.7 | 2.1 | -2.3 | yes |
| XLOC_015433 | GUCA1A                        | 0.6   | 2.0    | 1.9    | 1.6    | 0.5    | 1.7 | 1.7 | -1.7 | yes |
| XLOC_010526 | SLC7A5                        | 32.9  | 108.8  | 81.7   | 72.6   | 30.9   | 1.7 | 1.4 | -1.7 | yes |
| XLOC_011154 | DUSP14                        | 45.8  | 152.0  | 138.9  | 218.2  | 69.9   | 1.7 | 1.6 | -2.0 | yes |
| XLOC_012197 | LOC102168573                  | 49.8  | 162.4  | 139.3  | 124.3  | 26.0   | 1.7 | 1.5 | -2.7 | yes |
| XLOC_013571 | PLA2G2F                       | 52.5  | 172.8  | 209.2  | 218.4  | 79.7   | 1.7 | 2.0 | -1.5 | yes |
| XLOC_022452 | CSDC2                         | 14.2  | 46.9   | 45.3   | 68.3   | 15.5   | 1.7 | 1.7 | -2.6 | yes |
| XLOC_019476 | XLOC_031811                   | 0.6   | 1.9    | 1.6    | 2.2    | 0.4    | 1.7 | 1.5 | -2.6 | yes |
| XLOC_006578 | LOC106502828                  | 1.7   | 5.6    | 4.0    | 4.2    | 1.1    | 1.7 | 1.2 | -2.4 | yes |
| XLOC_016526 | DSG4                          | 15.6  | 49.5   | 39.3   | 54.7   | 12.8   | 1.7 | 1.4 | -2.6 | yes |
| XLOC_019583 | S100A3                        | 127.3 | 413.1  | 445.6  | 301.0  | 85.5   | 1.7 | 1.9 | -2.1 | yes |
| XLOC_015967 | LY6G6D                        | 195.9 | 632.1  | 675.2  | 674.7  | 165.3  | 1.7 | 1.8 | -2.6 | yes |
| XLOC_006247 | TGM6                          | 1.8   | 5.8    | 4.2    | 6.8    | 1.6    | 1.7 | 1.3 | -2.5 | yes |
| XLOC_017436 | NPTX2                         | 7.1   | 22.5   | 16.7   | 11.9   | 2.7    | 1.7 | 1.3 | -1.9 | yes |
| XLOC_021994 | NELL2                         | 0.6   | 1.9    | 1.5    | 2.4    | 0.4    | 1.7 | 1.3 | -2.1 | yes |
| XLOC_004410 | FAM49A                        | 10.6  | 33.8   | 30.8   | 29.5   | 9.8    | 1.7 | 1.6 | -2.0 | yes |
| XLOC_012222 | LOC100861381                  | 502.2 | 1624.9 | 1585.0 | 2906.4 | 815.1  | 1.7 | 1.7 | -2.5 | yes |
| XLOC_012219 | LOC106503220                  | 127.7 | 406.7  | 480.5  | 369.8  | 101.6  | 1.7 | 2.0 | -2.2 | yes |
| XLOC_024471 | FGF22                         | 2.0   | 6.5    | 6.2    | 10.3   | 3.0    | 1.7 | 1.6 | -2.1 | yes |
| XLOC_005274 | SHISA2                        | 34.4  | 106.4  | 129.1  | 107.7  | 27.4   | 1.7 | 2.0 | -2.2 | yes |
| XLOC_023279 | PRSS12                        | 1.1   | 3.3    | 4.0    | 2.6    | 1.2    | 1.7 | 1.9 | -1.5 | yes |
| XLOC_020918 | XLOC_032911                   | 1.6   | 4.9    | 4.5    | 5.9    | 1.7    | 1.6 | 1.6 | -2.4 | yes |
| XLOC_012217 | LOC102174062                  | 8.6   | 26.8   | 23.3   | 22.2   | 5.4    | 1.6 | 1.5 | -2.3 | yes |
| XLOC_012123 | LOC102186795,<br>XLOC_019104  | 2.8   | 8.5    | 7.6    | 7.3    | 2.0    | 1.6 | 1.5 | -2.2 | yes |
| XLOC_021915 | LOC102184223                  | 319.7 | 994.0  | 876.9  | 1248.9 | 448.3  | 1.6 | 1.5 | -2.2 | yes |
| XLOC_020923 | C3H2orf54                     | 23.0  | 71.8   | 59.1   | 76.7   | 23.2   | 1.6 | 1.4 | -1.9 | yes |
| XLOC_012448 | OTOP2                         | 2.2   | 6.7    | 5.3    | 9.3    | 2.0    | 1.6 | 1.3 | -2.7 | yes |
| XLOC_004082 | SLC9A2                        | 3.2   | 9.6    | 6.7    | 9.3    | 2.6    | 1.6 | 1.1 | -2.2 | yes |
| XLOC_001911 | KRTAP11-1                     | 891.5 | 2738.3 | 3164.2 | 5485.8 | 1230.2 | 1.6 | 1.9 | -2.9 | yes |
| XLOC_018334 | HKDC1                         | 1.4   | 4.3    | 3.9    | 4.4    | 1.4    | 1.6 | 1.5 | -2.0 | yes |
| XLOC_002856 | XLOC_004085                   | 611.0 | 1864.8 | 1679.4 | 2979.2 | 369.8  | 1.6 | 1.5 | -3.2 | yes |
| XLOC_004315 | SLC1A4                        | 5.8   | 17.4   | 12.5   | 11.1   | 5.0    | 1.6 | 1.1 | -1.4 | yes |
| XLOC_022355 | PIANP                         | 0.9   | 2.7    | 2.4    | 1.6    | 0.4    | 1.6 | 1.5 | -2.1 | yes |
| XLOC_003097 | LOC102174664                  | 10.8  | 32.8   | 31.6   | 16.2   | 4.9    | 1.6 | 1.6 | -1.7 | yes |
| XLOC_012227 | LOC102175054                  | 6.4   | 19.3   | 16.4   | 19.8   | 8.0    | 1.6 | 1.4 | -2.0 | yes |

|             |               |       |        |        |        |       |     |     |      |     |
|-------------|---------------|-------|--------|--------|--------|-------|-----|-----|------|-----|
| XLOC_003064 | SLC7A8        | 17.5  | 51.4   | 46.3   | 55.3   | 9.3   | 1.6 | 1.4 | -3.1 | yes |
| XLOC_019588 | LOC102168404  | 19.3  | 58.1   | 39.1   | 63.9   | 14.3  | 1.6 | 1.1 | -2.7 | yes |
| XLOC_003274 | ALDH1A2       | 0.5   | 1.4    | 2.7    | 1.7    | 0.6   | 1.6 | 2.5 | -2.0 | yes |
| XLOC_001002 | LOC102185739  | 4.0   | 11.8   | 12.7   | 17.9   | 5.3   | 1.6 | 1.7 | -1.9 | yes |
| XLOC_025517 | FAM167A       | 3.3   | 9.6    | 9.6    | 10.2   | 2.9   | 1.6 | 1.6 | -2.3 | yes |
| XLOC_023847 | LOC102186288  | 7.7   | 22.0   | 17.7   | 15.3   | 6.0   | 1.6 | 1.3 | -1.5 | yes |
| XLOC_013689 | ACTBL2        | 15.9  | 46.1   | 41.6   | 53.3   | 15.9  | 1.5 | 1.4 | -2.4 | yes |
| XLOC_002111 | LRRC15        | 88.9  | 257.7  | 183.7  | 321.8  | 86.8  | 1.5 | 1.1 | -2.4 | yes |
| XLOC_002442 | LOC102181431  | 53.6  | 156.4  | 267.7  | 457.2  | 121.8 | 1.5 | 2.4 | -2.8 | yes |
| XLOC_012586 | STK39         | 4.1   | 11.7   | 11.4   | 8.6    | 3.5   | 1.5 | 1.5 | -1.6 | yes |
| XLOC_004805 | C11H2orf40    | 13.9  | 40.0   | 35.0   | 22.1   | 5.6   | 1.5 | 1.4 | -2.3 | yes |
| XLOC_001163 | KRT6A         | 530.8 | 1544.1 | 1931.4 | 2367.4 | 776.5 | 1.5 | 1.9 | -2.0 | yes |
| XLOC_012563 | GPR155        | 7.0   | 19.4   | 17.3   | 15.8   | 5.2   | 1.5 | 1.3 | -1.5 | yes |
| XLOC_012479 | XLOC_019433   | 1.2   | 3.4    | 3.5    | 2.5    | 0.8   | 1.5 | 1.6 | -1.8 | yes |
| XLOC_017622 | DUSP5         | 10.9  | 30.5   | 31.0   | 34.0   | 13.3  | 1.5 | 1.6 | -1.5 | yes |
| XLOC_012226 | KRT35         | 245.9 | 692.9  | 691.1  | 613.4  | 194.8 | 1.5 | 1.5 | -2.3 | yes |
| XLOC_005993 | LOC102173761  | 26.0  | 71.8   | 169.7  | 75.0   | 36.1  | 1.5 | 2.8 | -1.3 | yes |
| XLOC_001168 | LOC102176522  | 41.9  | 117.1  | 88.3   | 85.8   | 20.6  | 1.5 | 1.1 | -2.4 | yes |
| XLOC_017567 | GOLGA7B       | 14.0  | 38.8   | 30.3   | 43.2   | 14.1  | 1.5 | 1.2 | -2.1 | yes |
| XLOC_005288 | GJB2,GJB6     | 150.7 | 412.6  | 448.4  | 435.7  | 123.1 | 1.5 | 1.6 | -2.1 | yes |
| XLOC_026747 | GJA1          | 235.8 | 637.8  | 574.5  | 589.4  | 185.7 | 1.5 | 1.3 | -2.0 | yes |
| XLOC_010211 | FOSB          | 2.2   | 5.9    | 8.3    | 7.8    | 55.9  | 1.5 | 2.0 | 2.7  | yes |
| XLOC_023939 | MSX1          | 15.0  | 40.9   | 37.1   | 26.7   | 9.7   | 1.4 | 1.4 | -1.7 | yes |
| XLOC_000648 | LOC102174647  | 1.4   | 3.8    | 3.9    | 2.5    | 0.9   | 1.4 | 1.5 | -2.0 | yes |
| XLOC_016467 | LOC102184018  | 5.0   | 13.6   | 11.0   | 14.2   | 4.3   | 1.4 | 1.2 | -2.0 | yes |
| XLOC_013888 | RNF180        | 3.1   | 8.2    | 6.6    | 5.5    | 1.9   | 1.4 | 1.2 | -1.8 | yes |
| XLOC_014353 | DIO3          | 11.4  | 30.7   | 30.8   | 23.9   | 5.7   | 1.4 | 1.5 | -2.4 | yes |
| XLOC_020916 | XLOC_032908   | 1.2   | 3.3    | 3.1    | 5.0    | 1.2   | 1.4 | 1.4 | -2.4 | yes |
| XLOC_007042 | LOC100861279  | 151.6 | 405.2  | 430.4  | 194.5  | 105.5 | 1.4 | 1.6 | -1.3 | yes |
| XLOC_017970 | XLOC_029610   | 45.6  | 124.1  | 150.5  | 151.4  | 85.9  | 1.4 | 1.8 | -1.1 | yes |
| XLOC_013005 | XLOC_020854   | 36.2  | 98.1   | 135.6  | 134.4  | 33.5  | 1.4 | 1.9 | -2.2 | yes |
| XLOC_005524 | EDNRB         | 5.4   | 14.4   | 12.7   | 8.9    | 3.5   | 1.4 | 1.3 | -1.1 | yes |
| XLOC_022591 | HOXC13        | 41.2  | 109.0  | 102.2  | 103.7  | 30.0  | 1.4 | 1.4 | -2.2 | yes |
| XLOC_017933 | XLOC_029197   | 0.9   | 2.4    | 2.7    | 2.9    | 1.8   | 1.4 | 1.7 | -1.6 | yes |
| XLOC_003843 | GLDN          | 1.9   | 4.8    | 4.0    | 4.6    | 1.5   | 1.4 | 1.1 | -1.8 | yes |
| XLOC_001912 | LOC100861181  | 874.5 | 2308.6 | 2582.7 | 3744.5 | 534.4 | 1.4 | 1.6 | -3.4 | yes |
| XLOC_018296 | RET           | 10.9  | 28.8   | 29.8   | 23.8   | 6.5   | 1.4 | 1.5 | -2.1 | yes |
| XLOC_013438 | ECEL1         | 2.9   | 7.6    | 6.1    | 9.2    | 1.6   | 1.4 | 1.1 | -2.4 | yes |
| XLOC_011764 | C19H17orf67   | 1.9   | 5.0    | 5.1    | 4.0    | 1.1   | 1.4 | 1.5 | -1.3 | yes |
| XLOC_021914 | KRT84         | 19.2  | 49.9   | 54.7   | 67.0   | 25.0  | 1.4 | 1.6 | -2.0 | yes |
| XLOC_004534 | ASS1          | 20.9  | 53.6   | 43.2   | 38.4   | 20.5  | 1.4 | 1.1 | -1.3 | yes |
| XLOC_006686 | CRISPLD1      | 2.0   | 4.9    | 4.0    | 3.1    | 2.2   | 1.4 | 1.1 | -1.0 | yes |
| XLOC_016697 | DNASE1L2,E4F1 | 45.3  | 116.4  | 112.8  | 170.3  | 64.9  | 1.4 | 1.4 | -1.7 | yes |

|             |               |       |        |        |        |       |     |     |      |     |
|-------------|---------------|-------|--------|--------|--------|-------|-----|-----|------|-----|
| XLOC_006483 | LOC102178921  | 1.7   | 4.3    | 3.4    | 3.3    | 1.7   | 1.3 | 1.0 | -1.2 | yes |
| XLOC_021570 | BMPER         | 0.9   | 2.1    | 1.8    | 1.4    | 0.5   | 1.3 | 1.1 | -2.0 | yes |
| XLOC_013599 | PADI3         | 54.5  | 136.8  | 115.8  | 115.0  | 30.6  | 1.3 | 1.1 | -2.3 | yes |
| XLOC_020365 | IVL           | 100.1 | 249.5  | 250.2  | 224.5  | 69.3  | 1.3 | 1.4 | -1.9 | yes |
| XLOC_003917 | RAB15         | 13.0  | 32.4   | 32.6   | 26.1   | 13.5  | 1.3 | 1.4 | -1.0 | yes |
| XLOC_018456 | GNG4          | 19.3  | 47.3   | 38.7   | 43.3   | 11.9  | 1.3 | 1.0 | -2.2 | yes |
| XLOC_005552 | SLC15A1       | 18.1  | 44.3   | 56.0   | 43.2   | 20.2  | 1.3 | 1.7 | -1.1 | yes |
| XLOC_001578 | LOC102176685  | 214.8 | 530.6  | 438.6  | 560.1  | 156.3 | 1.3 | 1.1 | -2.1 | yes |
| XLOC_026717 | ME1           | 13.5  | 32.7   | 29.0   | 31.1   | 15.3  | 1.3 | 1.1 | -1.3 | yes |
| XLOC_011199 | FOXN1         | 29.2  | 72.2   | 67.7   | 93.4   | 26.4  | 1.3 | 1.3 | -2.3 | yes |
| XLOC_016324 | DSC2          | 14.8  | 35.4   | 32.8   | 34.5   | 16.2  | 1.3 | 1.2 | -1.1 | yes |
| XLOC_009868 | GPT2          | 17.1  | 41.6   | 34.6   | 29.6   | 15.8  | 1.3 | 1.1 | -1.1 | yes |
| XLOC_013141 | DLX1          | 1.5   | 3.8    | 3.4    | 4.3    | 1.1   | 1.3 | 1.2 | -2.3 | yes |
| XLOC_020785 | PLK3          | 15.7  | 37.8   | 37.9   | 58.2   | 30.1  | 1.3 | 1.3 | -1.1 | yes |
| XLOC_026148 | LOC106502413  | 11.0  | 26.1   | 23.9   | 22.7   | 5.0   | 1.3 | 1.2 | -2.5 | yes |
| XLOC_010262 | FGF21         | 2.9   | 7.1    | 14.3   | 6.0    | 4.3   | 1.3 | 2.3 | -1.1 | yes |
| XLOC_022803 | MYL6B         | 6.5   | 15.5   | 12.8   | 9.0    | 3.1   | 1.3 | 1.0 | -2.1 | yes |
| XLOC_006264 | TNFRSF6B      | 4.7   | 11.3   | 11.8   | 17.2   | 6.3   | 1.2 | 1.4 | -1.8 | yes |
| XLOC_022661 | LOC102178426  | 92.4  | 216.6  | 197.2  | 214.5  | 86.9  | 1.2 | 1.1 | -1.6 | yes |
| XLOC_002779 | GYG1          | 26.3  | 61.2   | 56.2   | 55.3   | 23.4  | 1.2 | 1.1 | -1.4 | yes |
| XLOC_006223 | SMOX          | 11.2  | 26.4   | 25.5   | 22.5   | 10.5  | 1.2 | 1.2 | -1.3 | yes |
| XLOC_001913 | KAP8          | 910.5 | 2149.2 | 1874.0 | 4648.9 | 706.0 | 1.2 | 1.1 | -3.2 | yes |
| XLOC_012225 | LOC102175613  | 50.4  | 119.5  | 132.9  | 108.1  | 33.4  | 1.2 | 1.4 | -2.0 | yes |
| XLOC_023320 | SLC39A8       | 30.8  | 69.2   | 61.2   | 71.0   | 31.8  | 1.2 | 1.0 | -1.4 | yes |
| XLOC_022616 | LOC102184693  | 49.6  | 117.1  | 101.1  | 105.1  | 49.6  | 1.2 | 1.1 | -1.7 | yes |
| XLOC_020036 | EDN2          | 3.7   | 8.7    | 12.4   | 9.2    | 0.8   | 1.2 | 1.8 | -3.2 | yes |
| XLOC_006556 | ARC           | 4.2   | 9.7    | 10.1   | 12.5   | 5.2   | 1.2 | 1.3 | -1.5 | yes |
| XLOC_015440 | GNMT          | 20.1  | 46.9   | 49.1   | 39.2   | 18.9  | 1.2 | 1.3 | -1.5 | yes |
| XLOC_000950 | PSORS1C2      | 392.9 | 917.7  | 1140.0 | 1032.9 | 315.8 | 1.2 | 1.6 | -2.1 | yes |
| XLOC_019689 | VTCN1         | 4.6   | 10.4   | 10.6   | 13.3   | 5.4   | 1.2 | 1.3 | -1.6 | yes |
| XLOC_021227 | TSPAN33       | 2.2   | 5.2    | 6.4    | 5.2    | 1.9   | 1.2 | 1.6 | -1.8 | yes |
| XLOC_020660 | CTH           | 4.8   | 10.9   | 14.7   | 13.8   | 8.1   | 1.2 | 1.7 | -1.3 | yes |
| XLOC_023354 | LAP3          | 53.6  | 122.5  | 124.3  | 152.2  | 63.5  | 1.2 | 1.3 | -1.6 | yes |
| XLOC_013652 | MSX2          | 23.5  | 53.0   | 46.1   | 40.3   | 12.8  | 1.2 | 1.0 | -2.0 | yes |
| XLOC_009050 | ATF3          | 6.0   | 13.6   | 12.4   | 18.7   | 69.4  | 1.2 | 1.1 | 1.6  | yes |
| XLOC_018022 | ERI1          | 7.2   | 16.0   | 14.2   | 18.5   | 8.4   | 1.2 | 1.0 | -1.4 | yes |
| XLOC_018184 | GSR           | 11.3  | 25.0   | 28.1   | 24.4   | 11.9  | 1.2 | 1.4 | -1.3 | yes |
| XLOC_020155 | XLOC_032338   | 1.2   | 2.7    | 2.7    | 3.4    | 0.7   | 1.2 | 1.2 | -2.4 | yes |
| XLOC_011470 | GSDMA         | 106.0 | 236.8  | 230.0  | 220.2  | 116.4 | 1.2 | 1.2 | -1.2 | yes |
| XLOC_017796 | SFRP5         | 12.9  | 28.9   | 32.1   | 22.8   | 12.9  | 1.1 | 1.4 | -1.1 | yes |
| XLOC_011239 | RAP1GAP2      | 2.3   | 5.1    | 4.5    | 4.7    | 2.4   | 1.1 | 1.0 | -1.0 | yes |
| XLOC_018375 | PPIF          | 20.5  | 44.8   | 42.8   | 58.1   | 27.8  | 1.1 | 1.1 | -1.3 | yes |
| XLOC_011412 | DLX3          | 55.8  | 123.0  | 109.9  | 118.9  | 42.3  | 1.1 | 1.0 | -1.9 | yes |
| XLOC_018577 | LOC102175746, | 9.0   | 19.9   | 19.2   | 22.4   | 9.2   | 1.1 | 1.1 | -1.5 | yes |

| MAT1A       |                            |        |         |         |         |         |      |      |      |     |
|-------------|----------------------------|--------|---------|---------|---------|---------|------|------|------|-----|
| XLOC_006989 | LOC102169313               | 10.1   | 22.2    | 27.2    | 19.5    | 8.5     | 1.1  | 1.5  | -1.4 | yes |
| XLOC_011633 | AATK                       | 2.6    | 5.9     | 5.5     | 6.0     | 2.7     | 1.1  | 1.1  | -1.2 | yes |
| XLOC_013366 | MREG                       | 8.7    | 18.6    | 20.4    | 19.4    | 9.7     | 1.1  | 1.3  | -1.2 | yes |
| XLOC_021909 | LOC102182381               | 48.2   | 104.3   | 111.3   | 130.7   | 33.8    | 1.1  | 1.3  | -2.4 | yes |
| XLOC_027864 | AWAT1                      | 7.8    | 16.5    | 15.7    | 13.8    | 6.7     | 1.1  | 1.1  | -1.0 | yes |
| XLOC_008118 | WNT11                      | 14.9   | 32.0    | 29.6    | 25.2    | 8.4     | 1.1  | 1.0  | -1.9 | yes |
| XLOC_008415 | C16H1orf95                 | 3.7    | 8.0     | 8.1     | 9.6     | 4.5     | 1.1  | 1.2  | -1.4 | yes |
| XLOC_011707 | FADS6                      | 27.7   | 58.9    | 54.4    | 77.8    | 26.5    | 1.1  | 1.0  | -1.9 | yes |
| XLOC_009661 | FAM222A                    | 2.4    | 5.2     | 5.0     | 5.4     | 1.8     | 1.1  | 1.1  | -2.0 | yes |
| XLOC_011323 | LOC102169702               | 11.9   | 24.9    | 23.9    | 21.4    | 10.8    | 1.1  | 1.1  | -1.5 | yes |
| XLOC_010973 | KLK10,KLK11,<br>KLK12,KLK9 | 444.1  | 921.4   | 1048.9  | 812.8   | 428.8   | 1.1  | 1.3  | -1.1 | yes |
| XLOC_005927 | PROCR                      | 15.6   | 32.3    | 30.9    | 29.2    | 12.1    | 1.1  | 1.0  | -1.3 | yes |
| XLOC_016139 | LOC102184572               | 12.8   | 26.5    | 27.8    | 32.0    | 11.6    | 1.1  | 1.2  | -1.7 | yes |
| XLOC_005965 | FAM83D                     | 7.1    | 14.6    | 15.7    | 16.0    | 6.8     | 1.1  | 1.2  | -1.5 | yes |
| XLOC_008156 | ELF5                       | 18.5   | 37.9    | 37.8    | 34.4    | 20.0    | 1.0  | 1.1  | -1.1 | yes |
| XLOC_003976 | PGF                        | 2.6    | 5.5     | 6.0     | 5.1     | 3.2     | 1.0  | 1.2  | -1.1 | yes |
| XLOC_010178 | DEDD2                      | 17.5   | 36.3    | 36.0    | 41.1    | 23.7    | 1.0  | 1.1  | -1.1 | yes |
| XLOC_018934 | CST6                       | 7596.4 | 15678.2 | 20700.2 | 22227.8 | 10577.5 | 1.0  | 1.5  | -1.3 | yes |
| XLOC_003330 | GATM                       | 45.9   | 92.8    | 99.3    | 76.9    | 34.8    | 1.0  | 1.2  | -1.3 | yes |
| XLOC_007041 | LOC102180609               | 692.9  | 1407.0  | 1491.2  | 1397.2  | 503.9   | 1.0  | 1.2  | -2.0 | yes |
| XLOC_005126 | SARDH                      | 5.3    | 10.9    | 10.6    | 7.2     | 3.1     | 1.0  | 1.1  | -1.5 | yes |
| XLOC_011936 | TRPV3                      | 13.4   | 27.2    | 30.3    | 32.3    | 19.0    | 1.0  | 1.2  | -1.0 | yes |
| XLOC_010277 | CCDC155                    | 5.1    | 10.2    | 10.4    | 9.8     | 4.0     | 1.0  | 1.1  | -1.5 | yes |
| XLOC_026233 | CNTFR                      | 25.0   | 50.6    | 59.0    | 55.4    | 12.9    | 1.0  | 1.3  | -2.0 | yes |
| XLOC_022191 | HMOX1                      | 24.9   | 50.1    | 49.0    | 61.9    | 27.9    | 1.0  | 1.0  | -1.2 | yes |
| XLOC_005987 | WISP2                      | 7.6    | 3.6     | 3.5     | 5.2     | 8.8     | -1.1 | -1.1 | 1.3  | yes |
| XLOC_023794 | CORIN                      | 4.6    | 2.1     | 1.9     | 0.7     | 2.4     | -1.1 | -1.3 | 1.5  | yes |
| XLOC_014466 | ANPEP                      | 76.2   | 32.5    | 26.3    | 31.9    | 80.1    | -1.2 | -1.5 | 1.3  | yes |
| XLOC_025957 | HAND2                      | 3.3    | 1.4     | 1.4     | 1.1     | 2.1     | -1.2 | -1.2 | 1.2  | yes |
| XLOC_000191 | LOC102186944               | 802.2  | 317.0   | 1983.5  | 147.6   | 899.5   | -1.3 | 1.3  | 2.0  | yes |
| XLOC_007232 | LAYN                       | 14.7   | 5.6     | 5.1     | 4.3     | 9.4     | -1.4 | -1.5 | 1.1  | yes |
| XLOC_004262 | FOXI3                      | 11.7   | 4.3     | 1.7     | 2.2     | 7.2     | -1.4 | -2.8 | 1.6  | yes |
| XLOC_007352 | LYVE1                      | 5.9    | 1.8     | 2.5     | 1.7     | 6.4     | -1.7 | -1.2 | 2.2  | yes |
| XLOC_001332 | LOC102169863               | 13.3   | 4.1     | 3.4     | 1.8     | 2.8     | -1.7 | -1.9 | 1.2  | yes |
| XLOC_005992 | PI3                        | 5.6    | 1.6     | 12.4    | 0.8     | 5.5     | -1.8 | 1.2  | 2.2  | yes |
| XLOC_021908 | KRT4                       | 7.9    | 2.1     | 22.1    | 0.2     | 29.3    | -1.9 | 1.5  | 6.3  | yes |
| XLOC_001341 | LOC102171783               | 70.2   | 17.4    | 30.5    | 44.5    | 24.6    | -2.0 | -1.2 | -1.2 | yes |
| XLOC_022573 | LOC102184404               | 1332.1 | 321.1   | 3302.7  | 9083.2  | 5120.2  | -2.0 | 1.4  | -1.6 | yes |
| XLOC_015010 | LTF                        | 12.2   | 2.3     | 31.0    | 1.4     | 17.3    | -2.4 | 1.4  | 2.9  | yes |
| XLOC_000192 | LOC102189201               | 89.3   | 14.0    | 242.4   | 15.6    | 49.2    | -2.7 | 1.5  | 1.4  | yes |
| XLOC_002916 | COL6A5                     | 34.0   | 4.2     | 2.6     | 4.2     | 31.9    | -3.0 | -3.7 | 2.1  | yes |

|             |                                 |       |        |        |        |       |            |      |      |     |
|-------------|---------------------------------|-------|--------|--------|--------|-------|------------|------|------|-----|
| XLOC_014259 | CHGA                            | 9.1   | 1.0    | 0.5    | 1.9    | 7.3   | -3.2       | -4.2 | 2.4  | yes |
| XLOC_001289 | XLOC_001381                     | 5.3   | 0.0    | 2.5    | 8.4    | 0.0   | #NA<br>ME? | -1.0 | -4.1 |     |
| XLOC_021479 | XLOC_034503                     | 0.0   | 8.2    | 6.0    | 13.8   | 3.9   | inf        | inf  | -2.0 |     |
| XLOC_016636 | LOC106503556,<br>XLOC_026962    | 0.5   | 8.2    | 6.4    | 8.0    | 0.2   | 4.1        | 3.8  | 0.6  |     |
| XLOC_010141 | LGALS15, LGAL<br>S16            | 0.4   | 4.5    | 2.2    | 5.7    | 2.7   | 3.3        | 2.4  | -1.1 |     |
| XLOC_002441 | LOC102180888                    | 0.6   | 5.0    | 2.2    | 1.3    | 1.7   | 3.1        | 2.0  | 0.0  |     |
| XLOC_002633 | LOC102170736,<br>XLOC_003920    | 0.7   | 4.4    | 2.0    | 1.6    | 0.1   | 2.7        | 1.5  | -4.2 |     |
| XLOC_001914 | LOC102179810                    | 18.4  | 114.8  | 22.9   | 437.5  | 88.7  | 2.6        | 0.4  | -2.4 |     |
| XLOC_001801 | LOC102183236                    | 0.4   | 2.7    | 2.4    | 1.8    | 0.7   | 2.6        | 2.5  | -1.3 |     |
| XLOC_001791 | XLOC_003149                     | 158.2 | 882.2  | 417.7  | 637.2  | 92.2  | 2.5        | 1.4  | -3.2 |     |
| XLOC_027952 | LOC102190867                    | 7.4   | 35.0   | 20.8   | 42.6   | 36.8  | 2.3        | 1.5  | -0.8 |     |
| XLOC_012572 | DLX2                            | 1.6   | 7.6    | 3.3    | 6.3    | 1.2   | 2.2        | 1.1  | -3.3 |     |
| XLOC_012216 | LOC102179595                    | 491.1 | 2360.1 | 1305.9 | 4434.5 | 578.1 | 2.2        | 1.5  | -3.2 |     |
| XLOC_012288 | SLC4A1                          | 0.4   | 1.9    | 1.5    | 1.5    | 0.2   | 2.2        | 1.8  | -2.8 |     |
| XLOC_026558 | ENPP3                           | 0.4   | 1.6    | 0.6    | 3.3    | 0.4   | 2.1        | 0.8  | -3.3 |     |
| XLOC_004425 | XLOC_007217                     | 1.2   | 5.0    | 3.5    | 1.0    | 0.2   | 2.1        | 1.6  | -1.2 |     |
| XLOC_000474 | LOC106501730                    | 0.5   | 2.1    | 1.4    | 3.1    | 0.5   | 2.1        | 1.5  | -3.0 |     |
| XLOC_011487 | LOC102174594                    | 93.3  | 380.5  | 230.9  | 660.0  | 87.1  | 2.0        | 1.4  | -3.3 |     |
| XLOC_010819 | LOC102174421                    | 2.5   | 9.7    | 2.7    | 11.7   | 8.3   | 2.0        | 0.1  | -0.7 |     |
| XLOC_012451 | RAB37                           | 1.2   | 4.4    | 5.7    | 3.7    | 1.7   | 1.9        | 2.3  | -0.9 |     |
| XLOC_007185 | MMP1                            | 0.5   | 2.1    | 2.3    | 1.1    | 0.9   | 1.9        | 2.1  | 0.2  |     |
| XLOC_001915 | LOC100860930                    | 242.3 | 908.1  | 361.3  | 1394.9 | 213.7 | 1.9        | 0.6  | -3.0 |     |
| XLOC_022901 | SLC5A8                          | 1.2   | 4.3    | 4.1    | 2.8    | 1.9   | 1.9        | 1.8  | -0.9 |     |
| XLOC_005127 | LOC106502673,<br>XLOC_007806    | 10.4  | 37.5   | 21.7   | 20.8   | 4.9   | 1.9        | 1.1  | -1.8 |     |
| XLOC_013010 | LOC106503219                    | 1.3   | 4.7    | 2.9    | 3.0    | 0.5   | 1.8        | 1.2  | -2.2 |     |
| XLOC_002076 | EAF2, LOC10218<br>4002, SLC15A2 | 2.1   | 7.2    | 5.7    | 5.2    | 2.1   | 1.8        | 1.5  | -1.5 |     |
| XLOC_018675 | LOC106503719,<br>XLOC_030703    | 2.1   | 7.2    | 2.9    | 4.4    | 5.0   | 1.8        | 0.5  | 0.2  |     |
| XLOC_017774 | LOC102185708                    | 0.6   | 1.9    | 1.2    | 2.7    | 0.4   | 1.7        | 1.2  | -2.3 |     |
| XLOC_010797 | LOC102168381                    | 42.6  | 141.9  | 99.5   | 53.2   | 38.0  | 1.7        | 1.3  | -0.6 |     |
| XLOC_005968 | XLOC_009994                     | 0.6   | 1.9    | 1.2    | 1.6    | 0.6   | 1.7        | 1.1  | -1.9 |     |
| XLOC_000505 | LOC102180584                    | 7.1   | 22.8   | 5.8    | 23.9   | 26.2  | 1.7        | -0.2 | 0.6  |     |
| XLOC_008544 | RNF223                          | 2.7   | 9.0    | 6.7    | 13.8   | 13.2  | 1.7        | 1.3  | -0.3 |     |
| XLOC_016977 | LOC102183754                    | 0.8   | 2.6    | 1.5    | 2.9    | 0.8   | 1.7        | 0.9  | -2.3 |     |
| XLOC_008832 | MAP1LC3C                        | 2.0   | 6.2    | 3.3    | 4.2    | 0.7   | 1.6        | 0.8  | -2.4 |     |
| XLOC_017598 | MIR146B, XLOC<br>_028934        | 0.7   | 2.1    | 1.3    | 1.4    | 0.5   | 1.6        | 1.0  | -2.0 |     |

|             |                               |        |         |        |        |       |     |      |      |
|-------------|-------------------------------|--------|---------|--------|--------|-------|-----|------|------|
| XLOC_008938 | TMEM88B                       | 1.0    | 3.2     | 1.9    | 5.2    | 2.9   | 1.6 | 1.0  | -1.1 |
| XLOC_017544 | SLC35G1                       | 9.8    | 28.8    | 15.8   | 10.6   | 6.3   | 1.6 | 0.7  | -0.7 |
| XLOC_008791 | CAPN8                         | 5.0    | 14.9    | 10.6   | 11.3   | 3.4   | 1.6 | 1.1  | -2.2 |
| XLOC_020375 | LOC102176090                  | 13.3   | 40.0    | 61.9   | 43.0   | 20.5  | 1.6 | 2.3  | -1.0 |
| XLOC_020359 | PRR9                          | 1221.6 | 3559.7  | 3163.3 | 3422.9 | 699.7 | 1.6 | 1.4  | -2.7 |
| XLOC_026095 | TRPM6                         | 0.4    | 1.0     | 1.1    | 1.2    | 0.4   | 1.6 | 1.6  | -1.7 |
| XLOC_003178 | FMN1                          | 5.8    | 16.9    | 10.5   | 12.0   | 5.9   | 1.5 | 0.9  | -1.3 |
| XLOC_016961 | MLXIPL                        | 0.4    | 1.3     | 1.4    | 0.9    | 0.2   | 1.5 | 1.7  | -1.9 |
| XLOC_021235 | LOC102182474,<br>LOC102182943 | 0.9    | 2.4     | 1.6    | 2.8    | 1.5   | 1.5 | 0.9  | -1.2 |
| XLOC_018431 | PGBD5                         | 2.8    | 8.3     | 5.5    | 5.1    | 2.2   | 1.5 | 1.0  | -1.2 |
| XLOC_002040 | PLCXD2                        | 1.9    | 5.5     | 4.2    | 6.3    | 3.7   | 1.5 | 1.2  | -1.0 |
| XLOC_026188 | LGI3                          | 1.8    | 5.1     | 2.2    | 2.4    | 2.3   | 1.5 | 0.3  | -0.4 |
| XLOC_000440 | STS                           | 4.4    | 12.5    | 9.9    | 13.5   | 22.9  | 1.5 | 1.2  | 0.7  |
| XLOC_024860 | LOC102181858,<br>LOC102182119 | 0.8    | 2.3     | 1.4    | 3.0    | 0.8   | 1.5 | 0.8  | -2.2 |
| XLOC_001166 | KRT74                         | 44.2   | 124.6   | 75.2   | 143.5  | 41.8  | 1.5 | 0.8  | -2.1 |
| XLOC_018487 | RTKN2                         | 1.1    | 3.0     | 1.8    | 1.9    | 1.1   | 1.5 | 0.8  | -1.2 |
| XLOC_007325 | ABCC8                         | 0.9    | 2.6     | 1.7    | 1.9    | 0.8   | 1.5 | 0.9  | -1.8 |
| XLOC_018708 | PTPN5                         | 1.2    | 3.2     | 2.3    | 3.2    | 2.5   | 1.5 | 1.1  | -0.8 |
| XLOC_013683 | DEPDC1B                       | 1.6    | 4.4     | 3.2    | 1.9    | 1.2   | 1.5 | 1.0  | -0.5 |
| XLOC_007326 | KCNJ11                        | 1.0    | 2.6     | 1.8    | 2.1    | 0.6   | 1.4 | 0.9  | -2.2 |
| XLOC_008104 | CHRDL2                        | 0.6    | 1.6     | 0.6    | 1.1    | 0.6   | 1.4 | 0.2  | -0.3 |
| XLOC_018627 | XLOC_030675                   | 6.9    | 18.1    | 16.7   | 17.9   | 6.4   | 1.4 | 1.3  | -2.2 |
| XLOC_009726 | LOC102175427                  | 5.1    | 13.5    | 6.3    | 10.3   | 10.7  | 1.4 | 0.3  | -0.3 |
| XLOC_003459 | LOC102187597                  | 2.3    | 6.1     | 4.1    | 3.8    | 3.3   | 1.4 | 0.9  | -0.4 |
| XLOC_012021 | RNF222                        | 3.8    | 10.1    | 9.9    | 10.9   | 8.5   | 1.4 | 1.4  | -0.6 |
| XLOC_009109 | SFRP2                         | 1.9    | 4.9     | 3.3    | 2.3    | 1.6   | 1.4 | 0.9  | -0.6 |
| XLOC_008987 | SERPINC1                      | 0.7    | 1.7     | 1.5    | 2.1    | 0.7   | 1.4 | 1.3  | -1.6 |
| XLOC_016448 | CDH20                         | 0.6    | 1.6     | 1.3    | 1.0    | 0.8   | 1.3 | 1.1  | -0.4 |
| XLOC_020831 | CTPS1                         | 13.1   | 32.8    | 24.8   | 23.1   | 9.6   | 1.3 | 1.0  | -1.5 |
| XLOC_023844 | LOC102185449                  | 3.3    | 8.2     | 7.7    | 8.8    | 8.2   | 1.3 | 1.3  | -0.3 |
| XLOC_022038 | PPM1H                         | 2.8    | 6.9     | 5.0    | 6.1    | 3.1   | 1.3 | 0.9  | -1.4 |
| XLOC_005259 | SLC7A1                        | 14.0   | 35.2    | 20.9   | 25.2   | 14.0  | 1.3 | 0.6  | -1.2 |
| XLOC_004626 | DUSP2                         | 15.7   | 39.7    | 32.0   | 53.4   | 14.4  | 1.3 | 1.1  | -2.1 |
| XLOC_015984 | XLOC_025937                   | 0.7    | 1.8     | 1.1    | 1.6    | 0.5   | 1.3 | 0.7  | -2.2 |
| XLOC_017911 | CPXM2                         | 15.2   | 38.0    | 28.4   | 21.7   | 17.1  | 1.3 | 0.9  | -0.4 |
| XLOC_004937 | EFR3B                         | 0.9    | 2.2     | 1.6    | 1.4    | 0.7   | 1.3 | 0.9  | -1.3 |
| XLOC_010594 | DOK4                          | 8.6    | 21.6    | 20.1   | 18.4   | 5.8   | 1.3 | 1.3  | -1.9 |
| XLOC_019277 | CDC42BPG                      | 6261.3 | 15608.2 | 6946.7 | 6077.6 | 141.8 | 1.3 | 0.2  | -5.6 |
| XLOC_010649 | SMPD3                         | 6.4    | 15.9    | 14.3   | 16.0   | 21.6  | 1.3 | 1.2  | 0.2  |
| XLOC_021924 | CELA1,GALNT6                  | 2.0    | 4.9     | 4.3    | 6.3    | 3.7   | 1.3 | 1.2  | -0.8 |
| XLOC_004829 | LOC102191806                  | 12.4   | 30.9    | 9.9    | 16.6   | 8.8   | 1.3 | -0.3 | -0.4 |
| XLOC_012110 | EPN3                          | 5.1    | 13.0    | 12.3   | 12.4   | 8.6   | 1.3 | 1.3  | -0.9 |

|             |              |       |        |       |        |       |     |      |      |
|-------------|--------------|-------|--------|-------|--------|-------|-----|------|------|
| XLOC_017342 | ASL          | 46.3  | 115.3  | 75.9  | 160.2  | 101.5 | 1.3 | 0.8  | -1.1 |
| XLOC_014786 | ENTPD3       | 3.3   | 8.1    | 6.3   | 6.3    | 2.4   | 1.3 | 1.0  | -1.6 |
| XLOC_022429 | SYNGR1       | 32.4  | 79.9   | 66.2  | 83.8   | 45.9  | 1.3 | 1.1  | -0.8 |
| XLOC_012711 | SLC39A10     | 33.3  | 80.0   | 52.1  | 41.7   | 20.8  | 1.3 | 0.7  | -1.3 |
| XLOC_011855 | RAB11FIP4    | 2.3   | 5.5    | 4.3   | 6.5    | 2.6   | 1.3 | 1.0  | -1.2 |
| XLOC_015727 | GFOD1        | 10.2  | 24.7   | 16.7  | 19.9   | 12.4  | 1.3 | 0.8  | -0.9 |
| XLOC_027099 | SLC6A14      | 10.8  | 25.3   | 39.0  | 27.0   | 17.1  | 1.3 | 1.9  | -0.8 |
| XLOC_008744 | YOD1         | 6.2   | 15.0   | 10.4  | 18.8   | 20.1  | 1.3 | 0.8  | 0.0  |
| XLOC_021455 | AGMO         | 3.8   | 9.0    | 6.7   | 6.8    | 6.4   | 1.3 | 0.8  | -0.4 |
| XLOC_027911 | RBM3         | 109.5 | 263.0  | 201.4 | 117.1  | 134.1 | 1.3 | 0.9  | 0.1  |
| XLOC_019664 | PDZK1        | 18.3  | 43.9   | 55.1  | 34.8   | 20.0  | 1.3 | 1.6  | -1.0 |
| XLOC_014622 | TGM7         | 18.9  | 45.8   | 34.9  | 52.6   | 12.1  | 1.3 | 0.9  | -2.5 |
| XLOC_013706 | ARL15        | 22.7  | 53.6   | 41.1  | 39.7   | 16.4  | 1.3 | 0.9  | -1.4 |
| XLOC_009431 | LRAT         | 33.2  | 77.9   | 53.3  | 51.8   | 32.7  | 1.3 | 0.7  | -1.0 |
| XLOC_014760 | DCLK3        | 1.0   | 2.3    | 1.8   | 1.4    | 0.8   | 1.2 | 0.9  | -1.1 |
| XLOC_025849 | LOC102174302 | 1.0   | 2.3    | 2.0   | 1.7    | 0.8   | 1.2 | 1.1  | -1.0 |
| XLOC_004337 | MXD1         | 10.6  | 24.8   | 20.4  | 22.8   | 11.0  | 1.2 | 1.0  | -1.3 |
| XLOC_005260 | XLOC_008923  | 15.0  | 35.2   | 25.1  | 29.7   | 14.1  | 1.2 | 0.8  | -1.4 |
| XLOC_021667 | GPR37        | 1.5   | 3.6    | 2.5   | 1.9    | 1.2   | 1.2 | 0.7  | -0.9 |
| XLOC_025977 | FZD3         | 5.9   | 13.6   | 10.7  | 9.4    | 4.5   | 1.2 | 0.9  | -1.2 |
| XLOC_025502 | LOC102191795 | 2.8   | 6.6    | 3.5   | 4.7    | 3.2   | 1.2 | 0.3  | -0.4 |
| XLOC_014494 | SH3GL3       | 5.5   | 13.0   | 9.6   | 13.8   | 5.1   | 1.2 | 0.8  | -1.7 |
| XLOC_002083 | DIRC2        | 9.7   | 22.2   | 16.4  | 22.7   | 13.4  | 1.2 | 0.8  | -1.0 |
| XLOC_001816 | LOC102185652 | 466.7 | 1082.1 | 815.1 | 1244.5 | 770.2 | 1.2 | 0.9  | -0.9 |
| XLOC_010974 | KLK13        | 11.0  | 25.2   | 24.7  | 7.5    | 11.1  | 1.2 | 1.2  | 0.3  |
| XLOC_010854 | NKPD1        | 6.2   | 14.5   | 16.5  | 20.5   | 12.3  | 1.2 | 1.4  | -1.0 |
| XLOC_026738 | FABP7        | 17.3  | 39.6   | 50.2  | 20.8   | 12.9  | 1.2 | 1.6  | -0.4 |
| XLOC_017787 | SLIT1        | 1.2   | 2.8    | 1.8   | 1.8    | 1.3   | 1.2 | 0.6  | -0.7 |
| XLOC_009038 | KCNK2        | 3.9   | 8.6    | 7.5   | 5.1    | 3.3   | 1.2 | 1.0  | -0.7 |
| XLOC_004247 | IL37         | 10.2  | 23.1   | 31.7  | 41.1   | 77.7  | 1.2 | 1.7  | 1.0  |
| XLOC_001217 | XLOC_001280  | 120.4 | 272.1  | 251.1 | 285.7  | 234.7 | 1.2 | 1.1  | -0.5 |
| XLOC_001633 | LOC106501819 | 74.5  | 168.0  | 82.1  | 207.0  | 65.7  | 1.2 | 0.2  | -1.6 |
| XLOC_013468 | SERINC2      | 69.5  | 155.9  | 142.1 | 168.2  | 96.7  | 1.2 | 1.1  | -0.9 |
| XLOC_020372 | KPRP         | 36.7  | 82.5   | 92.3  | 176.1  | 221.0 | 1.2 | 1.4  | 0.3  |
| XLOC_008644 | SLC30A1      | 22.3  | 47.9   | 38.5  | 38.0   | 16.7  | 1.2 | 0.8  | -1.5 |
| XLOC_026178 | LZTS1        | 4.1   | 9.2    | 6.8   | 5.9    | 2.9   | 1.2 | 0.8  | -1.3 |
| XLOC_011795 | RNFT1        | 49.6  | 108.7  | 92.0  | 83.7   | 57.0  | 1.2 | 0.9  | -0.8 |
| XLOC_002114 | ATP13A4      | 3.6   | 7.9    | 6.5   | 3.6    | 4.0   | 1.2 | 0.9  | -0.3 |
| XLOC_001565 | LOC102174387 | 3.7   | 8.3    | 2.9   | 2.7    | 12.1  | 1.2 | -0.3 | 1.3  |
| XLOC_026272 | CTSV         | 208.6 | 457.6  | 459.2 | 451.2  | 300.0 | 1.1 | 1.2  | -0.7 |
| XLOC_024499 | REEP6        | 10.2  | 22.4   | 16.6  | 18.0   | 17.0  | 1.1 | 0.8  | -0.4 |
| XLOC_010970 | KLK6         | 107.5 | 236.6  | 245.9 | 54.2   | 52.3  | 1.1 | 1.2  | 0.2  |
| XLOC_004718 | LOC102184252 | 10.1  | 21.7   | 18.7  | 15.9   | 7.4   | 1.1 | 0.9  | -0.8 |
| XLOC_002315 | KY           | 1.5   | 3.3    | 1.9   | 1.3    | 0.9   | 1.1 | 0.4  | -0.5 |

|             |                   |       |       |       |       |       |     |     |      |
|-------------|-------------------|-------|-------|-------|-------|-------|-----|-----|------|
| XLOC_018221 | LOC102178509      | 14.2  | 30.7  | 23.7  | 33.0  | 19.6  | 1.1 | 0.8 | -0.9 |
| XLOC_000897 | ERICH4            | 1.5   | 3.2   | 1.9   | 1.6   | 1.1   | 1.1 | 0.4 | -0.4 |
| XLOC_021789 | ATG9B             | 27.0  | 58.9  | 51.7  | 67.0  | 36.8  | 1.1 | 1.0 | -1.1 |
| XLOC_027155 | GRIA3             | 2.9   | 6.3   | 4.7   | 3.4   | 2.1   | 1.1 | 0.7 | -0.8 |
| XLOC_018220 | LOC106503679      | 14.4  | 31.3  | 22.0  | 37.0  | 22.1  | 1.1 | 0.7 | -1.0 |
| XLOC_007534 | PLEKHB1           | 1.6   | 3.4   | 3.7   | 4.1   | 2.2   | 1.1 | 1.2 | -0.9 |
| XLOC_011253 | SPNS2             | 19.3  | 41.8  | 33.8  | 43.1  | 38.5  | 1.1 | 0.9 | -0.3 |
| XLOC_024643 | SLC36A1           | 7.7   | 16.4  | 15.8  | 11.5  | 10.2  | 1.1 | 1.1 | -0.3 |
| XLOC_007853 | PPP2R1B           | 36.5  | 76.8  | 61.2  | 68.9  | 32.1  | 1.1 | 0.8 | -1.4 |
| XLOC_012707 | NABP1             | 2.3   | 4.9   | 5.0   | 4.9   | 2.6   | 1.1 | 1.2 | -1.0 |
| XLOC_009553 | FZD10             | 33.3  | 71.4  | 59.8  | 54.0  | 20.4  | 1.1 | 0.9 | -1.6 |
| XLOC_017648 | PNLIPRP3          | 2.0   | 4.1   | 2.2   | 4.0   | 2.0   | 1.1 | 0.2 | -1.5 |
| XLOC_005759 | ASB13             | 9.2   | 19.7  | 15.6  | 21.0  | 12.9  | 1.1 | 0.8 | -0.9 |
| XLOC_025562 | CDKN2B            | 11.6  | 24.7  | 20.3  | 28.2  | 13.3  | 1.1 | 0.9 | -1.4 |
| XLOC_012523 | SLC40A1           | 47.9  | 99.4  | 69.6  | 101.5 | 37.9  | 1.1 | 0.6 | -1.6 |
| XLOC_021390 | INSIG1            | 40.5  | 85.9  | 73.3  | 93.1  | 53.1  | 1.1 | 0.9 | -1.1 |
| XLOC_019775 | EXTL2             | 1.8   | 3.7   | 2.7   | 2.5   | 1.2   | 1.1 | 0.6 | -1.4 |
| XLOC_009468 | USP38             | 12.4  | 25.5  | 23.9  | 27.5  | 13.8  | 1.1 | 1.0 | -1.2 |
| XLOC_015245 | SLC38A3           | 3.1   | 6.7   | 4.9   | 8.0   | 3.2   | 1.1 | 0.7 | -1.7 |
| XLOC_027559 | CLCN4             | 1.7   | 3.5   | 2.4   | 3.4   | 2.9   | 1.1 | 0.5 | -0.5 |
| XLOC_020378 | XLOC_032500       | 293.0 | 604.5 | 530.2 | 556.5 | 155.3 | 1.1 | 0.9 | -2.3 |
| XLOC_018924 | OVOL1             | 38.7  | 80.2  | 74.9  | 99.8  | 60.0  | 1.1 | 1.0 | -1.1 |
| XLOC_019472 | IGSF9             | 6.0   | 12.1  | 10.1  | 8.8   | 4.0   | 1.0 | 0.8 | -1.4 |
| XLOC_004881 | ASPRV1            | 183.3 | 383.1 | 503.8 | 514.6 | 506.0 | 1.0 | 1.5 | -0.2 |
| XLOC_008796 | WDR26             | 40.3  | 82.1  | 71.0  | 72.5  | 43.6  | 1.0 | 0.9 | -0.9 |
| XLOC_013289 | DNAH7             | 2.7   | 5.4   | 4.4   | 3.6   | 1.6   | 1.0 | 0.8 | -1.5 |
| XLOC_004809 | IL1A              | 2.5   | 5.0   | 5.9   | 5.7   | 9.9   | 1.0 | 1.3 | 0.6  |
| XLOC_004897 | PLB1              | 11.9  | 25.7  | 27.8  | 24.0  | 15.2  | 1.0 | 1.3 | -0.7 |
| XLOC_003953 | XLOC_005940       | 1.0   | 2.1   | 1.5   | 2.3   | 2.3   | 1.0 | 0.6 | -0.3 |
| XLOC_013337 | FZD5              | 1.4   | 2.8   | 2.0   | 3.3   | 1.7   | 1.0 | 0.6 | -1.3 |
| XLOC_007545 | NEU3              | 3.8   | 7.7   | 5.2   | 4.3   | 3.9   | 1.0 | 0.5 | -0.4 |
| XLOC_026294 | S1PR3             | 7.8   | 15.9  | 10.6  | 9.6   | 5.6   | 1.0 | 0.5 | -0.9 |
| XLOC_013682 | ELOVL7            | 44.2  | 87.4  | 71.8  | 64.0  | 44.5  | 1.0 | 0.7 | -0.6 |
| XLOC_019602 | LOC102188181      | 376.2 | 768.8 | 490.1 | 451.5 | 787.5 | 1.0 | 0.4 | 0.7  |
| XLOC_026806 | PRDM1             | 13.2  | 26.8  | 24.2  | 27.7  | 22.3  | 1.0 | 0.9 | -0.5 |
| XLOC_008548 | XLOC_013679       | 27.2  | 56.1  | 50.4  | 46.7  | 32.5  | 1.0 | 0.9 | -0.8 |
| XLOC_022723 | RAB3IP            | 17.9  | 36.2  | 36.1  | 34.6  | 28.3  | 1.0 | 1.1 | -0.5 |
| XLOC_016257 | LOC106503519      | 2.1   | 4.2   | 2.5   | 1.9   | 1.7   | 1.0 | 0.3 | 0.3  |
| XLOC_012392 | ENGASE            | 8.1   | 16.5  | 13.4  | 19.6  | 8.8   | 1.0 | 0.8 | -1.4 |
| XLOC_013597 | PADI4             | 7.2   | 14.8  | 14.1  | 10.9  | 5.0   | 1.0 | 1.0 | -0.9 |
| XLOC_017744 | ANKRD22           | 12.8  | 25.4  | 24.2  | 21.5  | 16.7  | 1.0 | 1.0 | -0.7 |
| XLOC_018347 | SLC29A3,UNC5<br>B | 41.1  | 83.9  | 67.5  | 87.7  | 47.1  | 1.0 | 0.8 | -1.1 |
| XLOC_022048 | AGAP2             | 0.7   | 1.5   | 1.1   | 1.3   | 1.0   | 1.0 | 0.7 | -0.4 |



|             |              |       |       |      |      |       |      |      |      |
|-------------|--------------|-------|-------|------|------|-------|------|------|------|
| XLOC_021986 | AMIGO2       | 2.9   | 5.8   | 3.8  | 5.1  | 2.8   | 1.0  | 0.4  | -0.8 |
| XLOC_002405 | EAF1         | 29.0  | 58.9  | 50.8 | 57.7 | 37.5  | 1.0  | 0.9  | -0.9 |
| XLOC_008580 | TNN          | 2.7   | 5.5   | 4.1  | 3.2  | 1.2   | 1.0  | 0.7  | -1.3 |
| XLOC_003296 | MYO5C        | 1.2   | 2.3   | 1.8  | 1.9  | 1.1   | 1.0  | 0.6  | -1.3 |
| XLOC_017798 | CRTAC1       | 10.8  | 21.8  | 15.6 | 11.3 | 6.3   | 1.0  | 0.6  | -1.0 |
| XLOC_026152 | CORO2A       | 0.6   | 1.3   | 0.9  | 1.3  | 0.6   | 1.0  | 0.6  | -1.2 |
| XLOC_004575 | ADAMTSL2     | 5.7   | 11.5  | 9.0  | 6.2  | 2.1   | 1.0  | 0.7  | -1.5 |
| XLOC_005313 | SLAIN1       | 3.5   | 7.1   | 6.2  | 8.2  | 2.7   | 1.0  | 0.9  | -1.8 |
| XLOC_001471 | LOC106503998 | 59.0  | 118.4 | 72.2 | 88.9 | 77.5  | 1.0  | 0.3  | -0.5 |
| XLOC_002831 | LOC102172488 | 3.0   | 6.0   | 4.5  | 4.0  | 3.0   | 1.0  | 0.6  | -0.6 |
| XLOC_017329 | PRSS8        | 26.1  | 52.5  | 51.5 | 69.8 | 41.7  | 1.0  | 1.0  | -0.9 |
| XLOC_020571 | LOC102182748 | 10.1  | 19.3  | 16.7 | 17.5 | 9.8   | 1.0  | 0.8  | -1.2 |
| XLOC_004124 | TGFA         | 8.3   | 16.6  | 12.3 | 14.2 | 13.0  | 1.0  | 0.6  | -0.3 |
| XLOC_021816 | SHH          | 4.0   | 8.0   | 5.8  | 4.6  | 1.9   | 1.0  | 0.6  | -1.3 |
| XLOC_008893 | CA6          | 4.7   | 9.3   | 14.1 | 11.0 | 11.5  | 1.0  | 1.6  | -0.3 |
| XLOC_002784 | LOC102174980 | 3.3   | 1.7   | 1.0  | 1.1  | 1.6   | -1.0 | -1.7 | 0.5  |
| XLOC_016249 | LOC102178679 | 27.6  | 13.7  | 21.8 | 29.1 | 31.6  | -1.0 | -0.3 | -0.2 |
| XLOC_017310 | QPRT         | 3.0   | 1.5   | 1.8  | 1.5  | 2.4   | -1.0 | -0.7 | 0.2  |
| XLOC_025350 | XLOC_039767  | 11.0  | 5.4   | 3.5  | 5.2  | 7.0   | -1.0 | -1.6 | 0.2  |
| XLOC_020264 | ACKR1        | 4.4   | 2.1   | 2.9  | 2.3  | 5.6   | -1.0 | -0.5 | 0.8  |
| XLOC_019354 | MRGPRF       | 19.3  | 9.6   | 8.9  | 13.1 | 22.1  | -1.0 | -1.1 | 0.6  |
| XLOC_027132 | GPC3         | 240.1 | 117.0 | 90.6 | 63.7 | 129.5 | -1.0 | -1.4 | 0.9  |
| XLOC_003383 | SYNE2        | 51.5  | 24.1  | 26.2 | 40.3 | 57.5  | -1.0 | -0.9 | 0.3  |
| XLOC_011573 | LOC102171917 | 9.7   | 4.7   | 3.8  | 7.5  | 11.8  | -1.0 | -1.3 | 0.7  |
| XLOC_002594 | TCTEX1D2     | 22.6  | 11.0  | 17.4 | 12.2 | 11.5  | -1.0 | -0.3 | -0.4 |
| XLOC_023955 | FGFBP1       | 118.0 | 57.3  | 83.7 | 64.3 | 163.2 | -1.0 | -0.5 | 0.8  |
| XLOC_016816 | ACSM5        | 2.5   | 1.2   | 2.4  | 1.6  | 2.3   | -1.0 | 0.0  | -0.2 |
| XLOC_027037 | SRPX2        | 4.2   | 2.0   | 2.2  | 1.6  | 2.7   | -1.0 | -0.9 | 0.6  |
| XLOC_002574 | MYLK         | 75.9  | 36.6  | 34.6 | 38.0 | 49.5  | -1.0 | -1.1 | 0.2  |
| XLOC_021701 | PLXNA4       | 2.4   | 1.1   | 0.8  | 1.0  | 2.0   | -1.0 | -1.5 | 0.9  |
| XLOC_006976 | TOX          | 6.4   | 3.0   | 2.1  | 5.9  | 13.3  | -1.0 | -1.6 | 0.9  |
| XLOC_015288 | PTH1R        | 43.1  | 20.8  | 12.7 | 12.5 | 23.3  | -1.1 | -1.7 | 0.7  |
| XLOC_008637 | BATF3        | 6.1   | 3.0   | 8.4  | 4.1  | 9.5   | -1.1 | 0.5  | 1.0  |
| XLOC_026898 | IL20RA       | 22.9  | 11.1  | 15.3 | 23.9 | 37.1  | -1.1 | -0.5 | 0.3  |
| XLOC_023654 | SYNPO2       | 16.1  | 7.6   | 6.5  | 8.2  | 10.1  | -1.1 | -1.3 | 0.2  |
| XLOC_003564 | CILP         | 31.6  | 15.0  | 15.8 | 13.0 | 31.7  | -1.1 | -1.0 | 1.7  |
| XLOC_021181 | INHBA        | 12.3  | 5.8   | 4.7  | 5.9  | 7.6   | -1.1 | -1.3 | 0.3  |
| XLOC_006419 | WFDC5        | 10.9  | 5.1   | 14.3 | 11.0 | 24.6  | -1.1 | 0.4  | 0.8  |
| XLOC_009397 | SUSD2        | 30.6  | 14.5  | 21.0 | 16.7 | 31.8  | -1.1 | -0.5 | 0.6  |
| XLOC_017655 | EMX2         | 8.8   | 4.2   | 4.2  | 3.8  | 7.4   | -1.1 | -1.0 | 0.9  |
| XLOC_019528 | NES          | 7.1   | 3.3   | 3.3  | 2.3  | 4.1   | -1.1 | -1.1 | 0.7  |
| XLOC_008842 | SELP         | 4.1   | 1.9   | 1.7  | 2.3  | 3.4   | -1.1 | -1.3 | 0.5  |
| XLOC_005548 | UGGT2        | 3.2   | 1.5   | 1.2  | 1.2  | 1.3   | -1.1 | -1.4 | 0.1  |
| XLOC_027673 | LOC102182858 | 14.7  | 6.7   | 7.8  | 6.8  | 9.2   | -1.1 | -0.9 | 0.1  |

|             |                                                |         |        |         |        |         |      |      |      |
|-------------|------------------------------------------------|---------|--------|---------|--------|---------|------|------|------|
| XLOC_015389 | ARMC12                                         | 1.3     | 0.6    | 0.6     | 1.4    | 2.8     | -1.1 | -1.1 | 0.9  |
| XLOC_027184 | FHL1                                           | 61.4    | 28.2   | 23.2    | 27.4   | 39.1    | -1.1 | -1.4 | 0.4  |
| XLOC_025880 | XLOC_041203                                    | 3.6     | 1.6    | 0.7     | 0.5    | 1.4     | -1.1 | -0.9 | 1.4  |
| XLOC_013909 | XLOC_022649                                    | 5.4     | 2.5    | 2.9     | 3.4    | 7.9     | -1.1 | -0.8 | 1.1  |
| XLOC_018802 | TMEM45B                                        | 24.1    | 11.1   | 31.9    | 21.0   | 49.7    | -1.1 | 0.4  | 0.7  |
| XLOC_016458 | SERPINB7                                       | 16.7    | 7.7    | 13.3    | 12.9   | 34.7    | -1.1 | -0.3 | 1.1  |
| XLOC_009199 | LOC102171808                                   | 17.3    | 8.0    | 21.2    | 10.9   | 17.3    | -1.1 | 0.3  | 0.5  |
| XLOC_005235 | POSTN                                          | 581.1   | 262.7  | 285.3   | 285.6  | 841.5   | -1.1 | -1.0 | 1.2  |
| XLOC_022773 | SLC26A10                                       | 4.3     | 1.9    | 2.1     | 2.8    | 3.5     | -1.1 | -1.0 | 0.2  |
| XLOC_014651 | PRIMA1                                         | 5.3     | 2.5    | 3.0     | 5.2    | 2.7     | -1.1 | -0.8 | -0.5 |
| XLOC_013044 | LOC106503629                                   | 5.1     | 2.3    | 4.0     | 4.3    | 3.5     | -1.1 | -0.3 | 0.1  |
| XLOC_008848 | MYOC                                           | 71.1    | 32.5   | 32.3    | 38.5   | 81.4    | -1.1 | -1.1 | 1.0  |
| XLOC_009287 | LOC102186039                                   | 2.6     | 1.2    | 1.2     | 0.8    | 2.1     | -1.1 | -1.0 | 1.4  |
| XLOC_024892 | LOC102173654                                   | 4.8     | 2.2    | 4.3     | 3.9    | 5.6     | -1.1 | -0.1 | 0.3  |
| XLOC_020763 | LOC102175263                                   | 102.5   | 46.9   | 80.3    | 45.5   | 74.3    | -1.1 | -0.3 | 0.0  |
| XLOC_021222 | FLNC                                           | 16.3    | 7.3    | 5.7     | 7.4    | 12.5    | -1.1 | -1.5 | 0.5  |
| XLOC_010051 | LOC102169125                                   | 7130.3  | 3199.7 | 17381.1 | 3492.7 | 5748.4  | -1.1 | 1.3  | 0.0  |
| XLOC_020760 | LOC102172960                                   | 56.2    | 25.1   | 31.2    | 49.5   | 66.8    | -1.1 | -0.8 | 0.3  |
| XLOC_010872 | DMPK                                           | 74.0    | 32.8   | 33.4    | 50.2   | 64.5    | -1.1 | -1.1 | 0.1  |
| XLOC_007253 | ZBTB16                                         | 7.9     | 3.6    | 5.0     | 16.6   | 23.8    | -1.1 | -0.6 | 0.4  |
| XLOC_009683 | LOC102187517                                   | 3.2     | 1.4    | 1.2     | 2.0    | 2.9     | -1.2 | -1.3 | 0.5  |
| XLOC_005468 | LOC102188510                                   | 3.7     | 1.6    | 2.8     | 1.6    | 2.4     | -1.2 | -0.4 | 0.4  |
| XLOC_013944 | C7                                             | 7.1     | 3.1    | 2.7     | 3.6    | 5.3     | -1.2 | -1.3 | -0.1 |
| XLOC_011819 | LOC102179411                                   | 58.4    | 26.2   | 58.0    | 73.3   | 405.3   | -1.2 | 0.0  | 1.8  |
| XLOC_000399 | LOC106503886                                   | 3.0     | 1.3    | 1.6     | 1.5    | 1.4     | -1.2 | -0.8 | 0.4  |
| XLOC_012509 | LIMS2                                          | 26.9    | 11.9   | 14.2    | 18.8   | 28.0    | -1.2 | -0.9 | 0.3  |
| XLOC_019553 | THBS3                                          | 22.2    | 9.8    | 6.3     | 6.7    | 8.7     | -1.2 | -1.8 | 0.3  |
| XLOC_025734 | LPL                                            | 4.1     | 1.8    | 1.6     | 1.8    | 3.1     | -1.2 | -1.3 | 0.8  |
| XLOC_026583 | SLC35D3                                        | 3.0     | 1.3    | 4.5     | 0.5    | 3.3     | -1.2 | 0.6  | 2.0  |
| XLOC_018398 | SNCG                                           | 12.6    | 5.6    | 4.3     | 5.9    | 7.7     | -1.2 | -1.5 | 0.3  |
| XLOC_003613 | NFATC4                                         | 14.2    | 6.3    | 5.5     | 5.1    | 10.7    | -1.2 | -1.3 | 0.9  |
| XLOC_010694 | LOC102169411                                   | 4263.4  | 1853.2 | 13284.3 | 878.0  | 2498.9  | -1.2 | 1.7  | 0.5  |
| XLOC_011010 | SSC5D                                          | 8.7     | 3.7    | 2.9     | 2.3    | 2.3     | -1.2 | -1.6 | -0.2 |
| XLOC_025690 | HRCT1                                          | 4.1     | 1.8    | 2.8     | 2.0    | 4.4     | -1.2 | -0.5 | 1.2  |
| XLOC_012198 | LOC106503214                                   | 12104.4 | 5241.6 | 8416.7  | 7430.0 | 16937.6 | -1.2 | -0.5 | 1.0  |
| XLOC_000671 | LOC102181202,<br>XLOC_000687                   | 401.2   | 173.8  | 275.2   | 397.7  | 573.0   | -1.2 | -0.5 | 0.2  |
| XLOC_002004 | COL8A1                                         | 5.3     | 2.3    | 2.3     | 2.1    | 3.0     | -1.2 | -1.2 | 0.1  |
| XLOC_014978 | LOC102188543,<br>LOC106503435,<br>LOC106503436 | 140.6   | 59.9   | 51.4    | 66.8   | 141.5   | -1.2 | -1.4 | 0.9  |

|             |                              |       |       |        |        |        |      |      |      |
|-------------|------------------------------|-------|-------|--------|--------|--------|------|------|------|
| XLOC_026941 | SYNE1                        | 24.6  | 10.7  | 11.2   | 14.5   | 27.2   | -1.2 | -1.1 | 0.9  |
| XLOC_025906 | COL27A1                      | 9.3   | 4.0   | 3.1    | 3.5    | 6.8    | -1.2 | -1.5 | 0.7  |
| XLOC_026933 | LOC102171153                 | 20.4  | 8.8   | 12.6   | 13.8   | 39.7   | -1.2 | -0.7 | 1.2  |
| XLOC_021823 | VIPR2                        | 5.5   | 2.4   | 3.9    | 3.5    | 7.5    | -1.2 | -0.5 | 1.1  |
| XLOC_026116 | SIT1                         | 2.5   | 1.1   | 1.6    | 1.6    | 3.1    | -1.2 | -0.6 | 0.9  |
| XLOC_007616 | C15H11orf96                  | 73.6  | 31.7  | 31.5   | 36.9   | 54.3   | -1.2 | -1.2 | 0.4  |
| XLOC_026258 | FBP2                         | 2.0   | 0.8   | 3.4    | 0.7    | 4.8    | -1.2 | 0.9  | 2.0  |
| XLOC_004522 | LOC102171346,<br>XLOC_007284 | 7.8   | 3.2   | 2.8    | 2.8    | 3.8    | -1.2 | -1.4 | 0.5  |
| XLOC_005522 | MYCBP2                       | 33.4  | 14.0  | 20.6   | 21.4   | 33.9   | -1.2 | -0.7 | 0.5  |
| XLOC_001183 | LOC102180308                 | 3.9   | 1.7   | 2.6    | 1.3    | 2.7    | -1.2 | -0.5 | 0.4  |
| XLOC_025518 | XLOC_040961                  | 1.3   | 0.5   | 1.2    | 1.3    | 1.2    | -1.2 | -0.1 | -1.0 |
| XLOC_000197 | LOC102188029,<br>XLOC_000158 | 17.6  | 7.3   | 23.4   | 14.1   | 40.6   | -1.2 | 0.4  | 0.6  |
| XLOC_013838 | STC2                         | 3.0   | 1.3   | 4.3    | 1.8    | 6.0    | -1.2 | 0.5  | 1.7  |
| XLOC_003581 | CALML4                       | 11.6  | 4.8   | 6.5    | 3.7    | 6.4    | -1.3 | -0.8 | 0.8  |
| XLOC_010746 | PPP1R14A                     | 81.1  | 34.1  | 33.7   | 35.9   | 53.6   | -1.3 | -1.2 | 0.4  |
| XLOC_014407 | XLOC_023414                  | 6.4   | 2.6   | 3.7    | 6.1    | 7.3    | -1.3 | -0.7 | 0.3  |
| XLOC_010779 | FCGBP                        | 197.0 | 81.1  | 106.2  | 183.2  | 323.2  | -1.3 | -0.8 | 0.4  |
| XLOC_003722 | GREM1                        | 29.4  | 12.1  | 17.5   | 17.4   | 29.7   | -1.3 | -0.7 | 0.7  |
| XLOC_009400 | XLOC_015000                  | 5.0   | 2.1   | 4.5    | 7.8    | 12.6   | -1.3 | -0.1 | -0.3 |
| XLOC_021513 | RELN                         | 3.9   | 1.6   | 1.2    | 1.9    | 3.0    | -1.3 | -1.7 | 0.8  |
| XLOC_014021 | TPPP                         | 8.1   | 3.4   | 4.0    | 12.3   | 14.8   | -1.3 | -1.0 | 0.0  |
| XLOC_010745 | LOC106503124,<br>XLOC_016878 | 2.3   | 0.9   | 0.8    | 1.3    | 1.5    | -1.3 | -1.4 | 0.2  |
| XLOC_014405 | SYNM                         | 26.2  | 10.7  | 13.6   | 16.9   | 21.2   | -1.3 | -0.9 | 0.2  |
| XLOC_010052 | LOC102169695                 | 983.7 | 393.7 | 2006.2 | 1302.2 | 1181.3 | -1.3 | 1.1  | -0.9 |
| XLOC_024222 | CNN1                         | 135.9 | 54.8  | 72.5   | 98.6   | 129.3  | -1.3 | -0.9 | 0.0  |
| XLOC_001142 | LMOD1                        | 20.9  | 8.4   | 8.7    | 12.0   | 22.1   | -1.3 | -1.2 | 0.7  |
| XLOC_018601 | GDF10                        | 1.5   | 0.6   | 0.6    | 0.8    | 1.3    | -1.3 | -1.4 | -0.1 |
| XLOC_025800 | LOC106502433,<br>XLOC_041158 | 6.0   | 2.4   | 2.4    | 2.5    | 5.8    | -1.3 | -1.3 | 0.9  |
| XLOC_014224 | PAX9                         | 1.3   | 0.5   | 1.3    | 0.9    | 1.5    | -1.3 | 0.1  | 0.3  |
| XLOC_020403 | ADAMTSL4                     | 56.0  | 21.9  | 28.8   | 34.7   | 61.7   | -1.3 | -0.9 | 0.7  |
| XLOC_010579 | IRX3                         | 20.6  | 8.1   | 17.8   | 10.8   | 20.5   | -1.3 | -0.2 | 0.7  |
| XLOC_005074 | PTGES                        | 71.6  | 28.3  | 43.5   | 27.2   | 58.7   | -1.3 | -0.7 | 0.9  |
| XLOC_022995 | LRMP                         | 7.6   | 3.0   | 5.2    | 6.2    | 19.3   | -1.3 | -0.5 | 1.1  |
| XLOC_006407 | LOC106502799                 | 11.4  | 4.4   | 4.9    | 7.8    | 10.5   | -1.4 | -1.2 | 0.3  |
| XLOC_012583 | LRP2                         | 5.7   | 2.1   | 4.1    | 5.5    | 6.6    | -1.4 | -0.4 | -0.3 |
| XLOC_004690 | DYSF                         | 35.5  | 13.6  | 11.9   | 8.6    | 10.4   | -1.4 | -1.5 | 0.1  |
| XLOC_020640 | NEXN                         | 15.6  | 5.9   | 9.4    | 6.9    | 5.9    | -1.4 | -0.7 | -0.4 |
| XLOC_002572 | ADCY5                        | 3.1   | 1.2   | 0.9    | 1.2    | 1.9    | -1.4 | -1.7 | 0.7  |
| XLOC_006892 | LY6E                         | 35.7  | 13.6  | 6.7    | 9.3    | 17.4   | -1.4 | -2.4 | 0.7  |
| XLOC_002445 | MAP3K7CL                     | 4.5   | 1.7   | 1.6    | 2.0    | 3.9    | -1.4 | -1.4 | 0.9  |

|             |                                                |        |        |         |       |        |      |      |      |
|-------------|------------------------------------------------|--------|--------|---------|-------|--------|------|------|------|
| XLOC_004827 | XLOC_007554                                    | 10.9   | 4.1    | 2.9     | 5.5   | 9.4    | -1.4 | -1.8 | 0.9  |
| XLOC_019612 | THEM5                                          | 76.0   | 28.6   | 47.1    | 47.0  | 77.4   | -1.4 | -0.6 | 0.3  |
| XLOC_018389 | C28H10orf99                                    | 2.5    | 0.9    | 3.8     | 0.6   | 4.1    | -1.4 | 0.6  | 2.9  |
| XLOC_012067 | XLOC_019048                                    | 3.0    | 1.1    | 1.4     | 1.4   | 1.0    | -1.4 | -1.1 | -0.3 |
| XLOC_001189 | RAET1E                                         | 2.7    | 1.0    | 1.3     | 1.1   | 3.6    | -1.4 | -1.0 | 1.5  |
| XLOC_017804 | HPSE2                                          | 2.0    | 0.7    | 1.3     | 1.1   | 3.2    | -1.4 | -0.5 | 1.5  |
| XLOC_007254 | XLOC_012313                                    | 11.4   | 4.2    | 7.6     | 22.2  | 25.5   | -1.4 | -0.5 | -0.1 |
| XLOC_000660 | LOC102177708                                   | 8.9    | 3.3    | 4.0     | 2.9   | 8.2    | -1.4 | -1.1 | 0.6  |
| XLOC_017734 | DKK1                                           | 4.7    | 1.7    | 1.7     | 1.6   | 4.2    | -1.4 | -1.5 | 1.1  |
| XLOC_022312 | CLEC2A                                         | 11.6   | 4.2    | 7.8     | 4.8   | 12.0   | -1.4 | -0.5 | 1.3  |
| XLOC_002295 | RBP2                                           | 2.8    | 1.0    | 2.7     | 1.4   | 4.5    | -1.4 | 0.0  | 1.1  |
| XLOC_008851 | XLOC_013887                                    | 5.9    | 2.1    | 1.1     | 1.0   | 2.6    | -1.5 | -2.3 | 1.4  |
| XLOC_004679 | ACTG2                                          | 306.7  | 108.3  | 196.8   | 164.5 | 203.9  | -1.5 | -0.6 | 0.0  |
| XLOC_000429 | TNNI1                                          | 11.4   | 4.0    | 6.2     | 10.0  | 14.0   | -1.5 | -0.8 | 0.2  |
| XLOC_003804 | FBXL22                                         | 2.0    | 0.7    | 0.8     | 1.1   | 1.8    | -1.5 | -1.3 | 0.2  |
| XLOC_020757 | LOC102174897                                   | 137.5  | 45.4   | 314.8   | 265.7 | 301.2  | -1.5 | 1.2  | -0.8 |
| XLOC_019273 | PYGM                                           | 7.3    | 2.5    | 2.4     | 2.4   | 3.5    | -1.5 | -1.6 | 0.4  |
| XLOC_028071 | EGFL6                                          | 13.2   | 4.5    | 2.6     | 2.8   | 1.6    | -1.6 | -2.3 | 0.0  |
| XLOC_004260 | LOC102184629                                   | 17.2   | 5.8    | 23.2    | 11.0  | 12.1   | -1.6 | 0.5  | 0.0  |
| XLOC_026239 | CCL21                                          | 68.1   | 22.8   | 34.7    | 33.9  | 60.4   | -1.6 | -0.9 | 0.8  |
| XLOC_012813 | DES                                            | 179.2  | 59.4   | 69.8    | 83.9  | 128.2  | -1.6 | -1.3 | 0.2  |
| XLOC_000236 | LOC102176514                                   | 8.4    | 2.9    | 9.4     | 6.3   | 19.1   | -1.6 | 0.2  | 0.4  |
| XLOC_016948 | CALN1                                          | 3.0    | 1.0    | 1.6     | 2.1   | 3.6    | -1.6 | -0.9 | 1.0  |
| XLOC_011809 | CA4                                            | 21.6   | 7.0    | 40.9    | 25.5  | 38.0   | -1.6 | 1.0  | -0.2 |
| XLOC_001158 | LOC102173556                                   | 4078.0 | 1304.5 | 10151.0 | 14.5  | 8347.3 | -1.6 | 1.4  | 8.5  |
| XLOC_006724 | ANGPT1                                         | 3.7    | 1.2    | 1.0     | 0.6   | 1.0    | -1.6 | -1.9 | 0.8  |
| XLOC_026118 | TPM2                                           | 195.5  | 63.1   | 80.6    | 85.4  | 161.8  | -1.6 | -1.2 | 0.6  |
| XLOC_000198 | LOC102188300,<br>LOC102188576,<br>LOC102189749 | 419.6  | 133.2  | 1009.1  | 361.7 | 1346.6 | -1.6 | 1.3  | 0.9  |
| XLOC_023544 | CXCL13                                         | 55.8   | 17.1   | 2.3     | 1.4   | 1.0    | -1.6 | -4.6 | -0.7 |
| XLOC_014652 | ASB2                                           | 3.0    | 0.9    | 1.6     | 2.5   | 4.0    | -1.7 | -0.8 | 0.6  |
| XLOC_007440 | HBBC                                           | 41.6   | 12.4   | 0.8     | 0.4   | 0.2    | -1.7 | -5.6 | 0.3  |
| XLOC_010695 | LOC102168852                                   | 59.0   | 17.8   | 70.4    | 41.6  | 15.1   | -1.7 | 0.3  | -1.8 |
| XLOC_025711 | LOC102191700                                   | 1.5    | 0.5    | 0.5     | 1.0   | 2.0    | -1.7 | -1.5 | 0.5  |
| XLOC_017228 | MYH11                                          | 161.1  | 48.7   | 64.8    | 95.5  | 141.7  | -1.7 | -1.3 | 0.3  |
| XLOC_010633 | TPPP3                                          | 58.5   | 17.6   | 35.9    | 39.3  | 89.2   | -1.7 | -0.7 | 0.9  |
| XLOC_006554 | LOC102177073                                   | 50.8   | 15.1   | 46.1    | 5.6   | 59.3   | -1.8 | -0.1 | 2.9  |
| XLOC_018717 | LOC100860781                                   | 54.0   | 15.8   | 47.1    | 9.0   | 34.3   | -1.8 | -0.1 | 1.8  |
| XLOC_008837 | DPT                                            | 130.8  | 37.9   | 52.3    | 34.7  | 69.5   | -1.8 | -1.3 | 0.9  |
| XLOC_001169 | KRT2                                           | 66.3   | 19.1   | 54.1    | 25.9  | 100.5  | -1.8 | -0.3 | 1.6  |
| XLOC_001406 | LOC102186478                                   | 18.2   | 5.2    | 4.2     | 22.0  | 18.3   | -1.8 | -2.1 | -0.7 |
| XLOC_008542 | TNFRSF18                                       | 23.5   | 6.7    | 17.9    | 10.4  | 87.0   | -1.8 | -0.4 | 2.6  |

|             |                              |        |       |        |       |        |      |      |      |
|-------------|------------------------------|--------|-------|--------|-------|--------|------|------|------|
| XLOC_014575 | NOVA1                        | 8.2    | 2.3   | 1.9    | 4.0   | 6.2    | -1.8 | -2.0 | 0.3  |
| XLOC_002332 | SH3BGR                       | 10.9   | 3.0   | 4.6    | 4.0   | 6.8    | -1.9 | -1.2 | 0.4  |
| XLOC_026238 | CCL19                        | 4.1    | 1.1   | 1.9    | 2.8   | 1.6    | -1.9 | -1.1 | -1.0 |
| XLOC_000196 | LOC102187755                 | 202.5  | 53.2  | 437.0  | 366.2 | 348.3  | -1.9 | 1.2  | -0.6 |
| XLOC_021080 | LOC102177127                 | 3.4    | 0.9   | 4.3    | 2.1   | 1.5    | -1.9 | 0.4  | -0.2 |
| XLOC_014180 | LOC102170823                 | 5.1    | 1.3   | 2.7    | 0.5   | 1.6    | -1.9 | -0.9 | 4.2  |
| XLOC_018066 | IDO1                         | 1.2    | 0.3   | 0.6    | 0.6   | 1.9    | -2.0 | -1.1 | 1.0  |
| XLOC_024619 | SPINK9                       | 162.1  | 40.6  | 142.0  | 79.2  | 237.2  | -2.0 | -0.1 | 1.1  |
| XLOC_015512 | LOC102174446                 | 222.7  | 55.7  | 58.7   | 71.4  | 115.5  | -2.0 | -1.9 | 0.4  |
| XLOC_020299 | XLOC_032423                  | 8.3    | 2.0   | 3.3    | 4.5   | 9.1    | -2.0 | -1.3 | 0.5  |
| XLOC_015944 | LOC102174708                 | 8.4    | 2.0   | 13.2   | 4.8   | 7.6    | -2.1 | 0.7  | 0.0  |
| XLOC_019587 | S100A7                       | 3754.0 | 879.4 | 7238.5 | 41.6  | 5071.8 | -2.1 | 1.0  | 6.3  |
| XLOC_000119 | XLOC_000092                  | 3.0    | 0.7   | 2.4    | 1.8   | 1.6    | -2.1 | -0.3 | 0.2  |
| XLOC_000873 | LOC102171143                 | 5.7    | 1.2   | 2.5    | 1.2   | 1.1    | -2.2 | -1.1 | 0.9  |
| XLOC_008741 | PIGR                         | 3.8    | 0.8   | 2.1    | 0.7   | 8.2    | -2.3 | -0.8 | 3.0  |
| XLOC_027323 | LOC102169084,<br>XLOC_043613 | 41.8   | 9.1   | 25.6   | 38.7  | 31.6   | -2.3 | -0.7 | -0.3 |
| XLOC_019908 | LOC102191099                 | 2.4    | 0.5   | 1.8    | 1.9   | 6.0    | -2.4 | -0.3 | 0.9  |
| XLOC_017877 | LOC106503650                 | 15.3   | 2.9   | 9.6    | 4.6   | 10.4   | -2.4 | -0.6 | 1.3  |
| XLOC_002915 | COL6A6                       | 20.3   | 3.7   | 2.7    | 0.8   | 1.9    | -2.4 | -2.9 | 0.9  |
| XLOC_011157 | LOC102180344                 | 94.1   | 12.7  | 130.6  | 23.9  | 134.8  | -2.9 | 0.5  | 2.1  |
| XLOC_012847 | CCL20                        | 6.8    | 0.9   | 8.7    | 2.3   | 6.0    | -2.9 | 0.4  | 1.3  |
| XLOC_014649 | C21H14orf142                 | 46.3   | 5.7   | 23.8   | 60.0  | 79.3   | -3.1 | -0.9 | -0.7 |
| XLOC_018844 | LOC102180194                 | 20.6   | 0.9   | 38.1   | 88.4  | 22.6   | -4.6 | 0.9  | -1.9 |
| XLOC_008624 | PRG4                         | 11.5   | 0.2   | 2.0    | 1.0   | 5.4    | -6.0 | -2.5 | 1.8  |
| XLOC_011820 | LOC102169698                 | 26.4   | 0.4   | 29.5   | 32.9  | 88.2   | -6.0 | 0.2  | 0.3  |

92

93

94 **Table S7:** List of primers used in this study

| <b>goat</b>  |                       |
|--------------|-----------------------|
| primers      | Sequence (5'-3')      |
| TYR-F        | AAACCACGACAAAGCCAGGA  |
| TYR-R        | GCGGACTAGCAAATCCTTCCA |
| SFRP1_F      | AGCTGAAATCGGAAGCCATA  |
| SFRP1_R      | CTTCTTCTTCTTGGGGACGA  |
| WNT11-F      | CGCCTCTCTGGAAATGAAGT  |
| WNT11-R      | GACAGGTAGCGGGTCTTGAG  |
| KRT82_F      | ACCGCTTGTTGGGTCTTCTG  |
| KRT82_R      | TCTGCTCCTTCTCATCCCTCT |
| BAMBI_F      | GCCTTCTTTGGAGTGCTGTC  |
| BAMBI_R      | CTTTGGTGATGAGGTTTCTGC |
| MAT2A_F      | CCAAACTGGCTGAACTACGC  |
| MAT2A_R      | TGGACTCTGATGGGAAGCA   |
| ACTB_F       | TCTGGCACCACACCTTCTAC  |
| ACTB_R       | TCTTCTCACGGTTGGCCTTG  |
| DIO3_F       | GAACCAGCACATCCTCGACT  |
| DIO3_R       | TGATACTTGGTGACCAGGCG  |
| FOXN1_F      | AGCCCCAAGGGGACTTCAT   |
| FOXN1_R      | CGGGGTACTTCTCTGAGGGT  |
| FZD10_F      | GGATGATGTAGCCCACCGAG  |
| FZD10_R      | TGCTCTGCTTCTTCTCCAGC  |
| GPC3_F       | GGCAAGCTATGTGCCCATTC  |
| GPC3_R       | TGCAGATGTAGCCAGGCAAA  |
| TCEA3_F      | CCAGGAAGAAGACGGAAGGG  |
| TCEA3_R      | CGACTCCAATCCTGGTGGTC  |
| SMOX_F       | CACAGAGATGCTTCGGCAGT  |
| SMOX_R       | CTGCATAGGCGCTGTCTTGG  |
| <b>mouse</b> |                       |
| primers      | Sequence (5'-3')      |
| ACTB_F       | CAGCCTTCCTTCTTGGGTAT  |
| ACTB_R       | TGGCATAGAGGTCTTTACGG  |
| CSDC2_F      | AGGGCGTCTGTAAGCAGTTC  |
| CSDC2_R      | ACTCCCCCTCGATGTCAGAA  |
| FOXN1_F      | ACCTCTACCTGCCCACACAC  |
| FOXN1_R      | TCAGTCCCAAGGTCTCCATC  |
| NOTCH1_F_M   | ACCCACTCTGTCTCCCACAC  |
| NOTCH1_R_M   | GCTTCCTTGCTACCACAAGC  |
